# Supplementary material for: Early life-course socioeconomic position, adult work-related factors and oral health disparities: cross-sectional analysis of the J-SHINE study
Source: PubMed Central journal article supplement — BMJ Open. 2014 Oct 3;4(10):e005701. doi: 10.1136/bmjopen-2014-005701 (PMC4187658; doi:10.1136/bmjopen-2014-005701), 2014-10-03
Supplement: bmjopen-2014-005701.draft_revisions.pdf [file bmjopen-2014-005701.draft_revisions.pdf]

# BMJ Open

**Oral health disparities across socioeconomic position: the influence of economic difficulties in childhood and current work-related factors, from J-SHINE (Japanese study of Stratification, Health, Income, and Neighborhood) study**

|                                 |                                                                                                                                                                                                                                                                                                                                                                                                                                                                                                                   |
|---------------------------------|-------------------------------------------------------------------------------------------------------------------------------------------------------------------------------------------------------------------------------------------------------------------------------------------------------------------------------------------------------------------------------------------------------------------------------------------------------------------------------------------------------------------|
| Journal:                        | <i>BMJ Open</i>                                                                                                                                                                                                                                                                                                                                                                                                                                                                                                   |
| Manuscript ID:                  | bmjopen-2014-005701                                                                                                                                                                                                                                                                                                                                                                                                                                                                                               |
| Article Type:                   | Research                                                                                                                                                                                                                                                                                                                                                                                                                                                                                                          |
| Date Submitted by the Author:   | 14-May-2014                                                                                                                                                                                                                                                                                                                                                                                                                                                                                                       |
| Complete List of Authors:       | Tsuboya, Toru; Harvard School of Public Health, Social and Behavioral Science; Tohoku university, School of Dentistry<br>Aida, Jun; Tohoku University Graduate School of Dentistry, Department of International and Community Oral Health<br>Kawachi, Ichiro; Harvard School of Public Health,<br>Katase, Kazuo; Tohoku Gakuin University, Department Human Science, Faculty of Liberal Arts<br>Osaka, Ken; Tohoku University Graduate School of Dentistry, Department of International and Community Oral Health |
| <b>Primary Subject Heading</b>: | Occupational and environmental medicine                                                                                                                                                                                                                                                                                                                                                                                                                                                                           |
| Secondary Subject Heading:      | Dentistry and oral medicine                                                                                                                                                                                                                                                                                                                                                                                                                                                                                       |
| Keywords:                       | Epidemiology < TROPICAL MEDICINE, OCCUPATIONAL & INDUSTRIAL MEDICINE, PUBLIC HEALTH, SOCIAL MEDICINE                                                                                                                                                                                                                                                                                                                                                                                                              |
|                                 |                                                                                                                                                                                                                                                                                                                                                                                                                                                                                                                   |

SCHOLARONE™  
Manuscripts

**Title:**

Oral health disparities across socioeconomic position: the influence of economic difficulties in childhood and current work-related factors, from J-SHINE (Japanese study of Stratification, Health, Income, and Neighborhood) study

**Corresponding author:**

Full name: Toru Tsuboya

Postal address: 75 Saint Alphonsus Street Apt. #311, Boston, MA, 02120

Email: tsubo828@gmail.com

Tel: +1-617-283-9677

**Authors:** Toru Tsuboya<sup>1,2</sup>, Jun Aida<sup>2</sup>, Ichiro Kawachi<sup>1</sup>, Kazuo Katase<sup>3</sup>, Ken Osaka<sup>2</sup>

1: Harvard School of Public Health, Department of Social and Behavioral Sciences, Boston, USA

2: Tohoku University Graduate School of Dentistry, Department of International and Community Oral Health, Sendai, Japan

3: Tohoku Gakuin University, Department Human Science, Sendai, Japan

**Abstract**

Background. We quantified the association between socioeconomic position (SEP) and oral health, and examined the influence of economic difficulties in childhood and workplace-related factors on the association in Japan.

Methods. We cross-sectionally assessed self-rated oral health (SROH) among 3,201 workers aged 25-50 years old. Logistic regression model was used to estimate odds ratios (ORs) for the association between SROH and each indicator of SEP (annual household income, wealth, educational attainment, occupation, and economic situation in childhood).

Results. Each indicator of SEP, including childhood SEP, was significantly inversely associated with SROH, and all of the workplace-related factors (social support in the workplace, job stress, working hours, and type of employment) were also significantly associated with SROH. Compared with professionals, blue collar workers had significantly higher OR of poor SROH, and, the association was substantially explained by the workplace-related factors: ORs ranged from 1.44 in the age- and sex- adjusted model to 1.18 in the multivariate model. Poverty during childhood at age five and at age fifteen were associated with poorer SROH, and these two factors seemed to be independently associated with SROH.

Conclusion. We found oral health disparity across SEP among workers in Japan. The association between occupation and SROH was mostly explained by job-related factors.

Economic difficulties during childhood appear to affect SROH in adulthood separately from sex, age, and the current workplace-related factors. Improving childhood poverty and workplace environment may be an approach to reduce oral health disparities.

### Strengths and limitations of this study

· Previous studies have shown an association between socioeconomic positions (SEP) in adulthood and oral health, however few have examined the relation between SEP in childhood and oral health in adulthood.

· Using cross-sectional data of 3,201 workers aged 25-50 years old in Japan, we found evidence that economic difficulties during childhood as well as SEP in adulthood independently appeared to affect self-rated oral health (SROH) in adulthood among working men and women.

· Workplace-related factors (social support in the workplace, job stress, working hours, and type of employment) substantially explained the association between occupation and SROH.

· The response rate was low, however, the obtained sample was properly equivalent with respect to age, sex, and education, compared with vital statistics in Census 2010 of the target population. Therefore, it is likely that the results of the present study could be generalizable to the target population.

## Background

Oral health problems, such as dental caries, periodontal disease, and edentulism, afflict more than half of the population of the planet (3.9 billion people) and untreated dental caries is the most prevalent condition (35% across all ages) among the 291 conditions listed in the Global Burden of Disease 2010.<sup>1,2</sup> Using disability-adjusted life years (DALYs), they estimated that the global burden of oral conditions would increase by approximately 20%, from 12.4 million years in 1990 to 15.0 million years in 2010.<sup>1,2</sup> In addition to their high prevalence, oral health conditions are a major contributor to socioeconomic disparities in health.<sup>3,4</sup>

Oral health is an exquisitely sensitive “mirror” of socioeconomic conditions – e.g. nutrition, preventive practices, and access to oral health care – as well as an important marker of future physical health conditions (e.g. cardiovascular disease).<sup>5-8</sup> The major indicators of socioeconomic positions (SEP) include income, wealth, education, and occupation.<sup>9</sup> SEP is associated not only with general health, but also with oral health. Some studies examined the associations between income/education and oral health; those who had higher income, or higher educational attainment had better oral health.<sup>4, 10-13</sup> On the other hand, there are fewer studies on the association between occupational class and oral health. To our knowledge, only four previous studies examined the association between occupation and oral health.<sup>3, 14-16</sup> Poulton et al. examined the association of dental health (tooth cleanliness, gingival bleeding, periodontal disease and tooth decay) with combination of parental occupation in childhood with occupation in adulthood among 1,000 children in New Zealand; they reported clear social gradients among these oral conditions.<sup>3</sup> Morita et al. examined the association of occupations with oral conditions, based on approximately 16,000 Japanese workers; they reported that professionals had better oral conditions than

1  
2  
3  
4  
5  
6 office workers and blue collar workers in Japan.<sup>14, 15</sup> Tsakos et al. reported clear social  
7  
8 gradients in oral health, based on a sample of 6,600 community-dwelling English people  
9  
10 aged 50 years and older.<sup>16</sup> However, none of these considered workplace-related factors,  
11  
12 such as social support, working hours, type of employment or job stress, as potential  
13  
14 mediators of the association between occupations and health. Workplace-related factors  
15  
16 may be candidates for mitigating oral health disparities.

17  
18 Psychological stress is a risk factor for oral diseases, such as periodontitis, and  
19  
20 gingivitis.<sup>17-20</sup> Therefore, we hypothesized that job stress (including work hours) – as  
21  
22 well as stress-buffering factors such as workplace social support – would mediate the  
23  
24 association between occupational class and oral health.

25  
26 In this study, we first examined approximately three thousand workers aged  
27  
28 25-50 years old in Japan to elucidate the associations between indicators of SEP  
29  
30 (occupation, income wealth, education and SEP in childhood) and oral health. We then  
31  
32 examined the mediation of socioeconomic disparities by workplace-related factors  
33  
34 (social support in workplace, job stress, working hours and type of employment).  
35  
36  
37  
38  
39

## 40 **METHODS**

### 41 **Participants**

42  
43 We conducted the present study by using data from the J-SHINE (Japanese  
44  
45 study of Stratification, Health, Income, and Neighborhood), the details of which have  
46  
47 been previously described.<sup>21</sup> In brief, between October 2010 and February 2011, 13,920  
48  
49 community-dwelling residents aged 25 to 50 years were randomly selected from four  
50  
51 municipalities in and around Tokyo, Japan. Of those who were invited, 4,385 men and  
52  
53 women responded (31.6%) to the invitation; these individuals formed the baseline of the  
54  
55 J-SHINE study. The questionnaire was self-administered using a computer-assisted  
56  
57  
58  
59  
60

1  
2  
3  
4  
5  
6 personal interview format, unless the participants requested a face-to-face interview.  
7  
8 We excluded participants who did not answer the question about self-rated oral health,  
9  
10 or who responded that they were not active in the labor market (including homemakers  
11  
12 and students); this result in 3,201 eligible participants.  
13

#### 14 15 16 Measurements

17  
18 All measures in this study were obtained by self-report. Basic demographic  
19  
20 variables included sex (men/women), age (25-29, 30-34, 35-39, 40-44, and 45-50 years  
21  
22 old), and marital status (yes/no). Self-rated oral health (SROH) was used to evaluate  
23  
24 oral conditions. SROH is a screening tool that can evaluate needs of dental care among  
25  
26 people, especially those who do not usually visit dentists, and its validity and high  
27  
28 internal consistency have been confirmed.<sup>22, 23</sup> SROH was assessed by the following  
29  
30 question. *“Overall, how would you rate the health of your teeth and gums?”* Potential  
31  
32 responses ranged from *“1.excellent, 2.good, 3.fair, 4.not so good or 5.poor”*. In the  
33  
34 analysis, the outcome was dichotomized: “1.excellent and 2.good, 3.fair” as “Good SROH”,  
35  
36 and “4.not so good and 5.poor” as “Poor SROH”.  
37  
38  
39

40 As indicators of SEP, we used annual household income, wealth, educational  
41  
42 attainment, occupation, and economic situations during childhood. Annual household  
43  
44 income was divided into three categories; less than JPY 5 million (Approximately GBD  
45  
46 29,400), JPY 5 to 7.5 million (GBD 29,400-44,100), or more than JPY 7.5 million (GBD  
47  
48 44,100). Wealth was divided into three categories; less than JPY 3 million (GBD 17,600),  
49  
50 JPY 3 to 5 million (GBD 17,600-29,400), or more than JPY 5 million (GBD 29,400).  
51  
52 Educational attainment was divided into three categories; high school or less,  
53  
54 vocational/junior college, and university or more. Occupational class was divided into  
55  
56 three categories; professionals, office workers or blue collar workers. Occupations were  
57  
58  
59  
60

1  
2  
3  
4  
5  
6 self-reported, but, in addition, a sociologist on the team (K.K.) examined each response  
7  
8 to determine the correct classification based on the detailed job description provided by  
9  
10 the participants. Our method of occupational classification was previously used in “The  
11  
12 national survey of Social Stratification and social Mobility”, which has been conducted  
13  
14 in Japan every ten years since 1955 and is regarded as the most academically valid  
15  
16 classification of occupations in Japan.<sup>24</sup> Economic conditions in childhood were  
17  
18 evaluated through the following questions. *“How would you rate the economic*  
19  
20 *conditions in your household at age five (fifteen)?”* The answers were selected from  
21  
22 *“1.very difficult, 2. difficult, 3.normal, 4. well off 5. very well off”*. In the analysis, the  
23  
24 answers were divided into three groups: “1.very difficult, 2. difficult”, “3.normal” and “4.  
25  
26 well off 5. well off”. This question was derived from the Comprehensive Survey of Living  
27  
28 Conditions, which is annually conducted by the Ministry of Health, Labour, and Welfare,  
29  
30 and is regarded as a standard way to evaluate subjective economic situation in Japan.  
31  
32

33  
34 With regard to workplace-related factors, job stress, social support in  
35  
36 workplace, working hours, and type of employment were used. Job stress was evaluated  
37  
38 by seven questions, which were taken from the Brief Job Stress Questionnaire (BJSQ).  
39  
40 BJSQ has been validated for use with Japanese workers, and consists of lists the 84  
41  
42 questions which assesses job stress, social support in workplace and subjective  
43  
44 physical/mental symptoms.<sup>25</sup> BJSQ has been used in workplaces in Japan and was used  
45  
46 in previous research in Japan.<sup>25, 26</sup> One example of the seven questions on the job stress  
47  
48 was *“I have to deal with a lot of tasks”*, and the answer was chosen from *“1.yes, 2.rather*  
49  
50 *yes 3.rather no, 4.no”*. Aggregated scores for the seven questions were divided into  
51  
52 tertiles. Social support in workplace consisted of six questions, which were also taken  
53  
54 from BJSQ. One example of six questions was *“How reliable is your boss when you are*  
55  
56 *in trouble?”*, and the answer was chosen from *“1.very, 2.fairly 3.to some extent, 4.not”*.  
57  
58  
59  
60



1  
2  
3  
4  
5  
6 Aggregated scores for the six questions were divided into tertiles. Working hours were  
7  
8 divided into four groups: less than 40 hours per week, 40 to 50 hours per week, 50 to 60  
9  
10 hours per week, or more than 60 hours per week. Type of employment was divided into  
11  
12 three groups: permanent, precarious or self-employment.  
13

#### 14 15 16 Statistical analysis

17  
18 Differences in background characteristics according to SROH (good or poor)  
19  
20 were compared using the chi-square test (Table1). We estimated logistic regression  
21  
22 models for the association between poor SROH and SEP. We computed sex- and age-  
23  
24 adjusted odds ratio (OR) and 95% confidence intervals (C.I.) for poor SROH among office  
25  
26 workers and blue collar workers, compared with professionals. We also calculated the  
27  
28 ORs between each SEP and SROH (Table2), and the ORs between work-related factors  
29  
30 and SROH (Table3). Additionally, we estimated the multivariate ORs for the association  
31  
32 between occupations and SROH, adjusting for work-related factors, such as job stress  
33  
34 social support in workplace, working hours, and type of employment (Table4). Dummy  
35  
36 variables were used for missing data in all analysis. SAS 9.3 (SAS Institute, Cary, NC)  
37  
38 was used for all statistical analyses.  
39  
40  
41  
42

#### 43 44 Ethics

45  
46 The study was approved by the ethics committee of the Graduate School of  
47  
48 Medicine and Faculty of Medicine, The University of Tokyo.  
49  
50

#### 51 52 **Results**

53  
54 Table 1 describes the basic characteristics of the study participants according  
55  
56 to level of SROH. All of the characteristics except marital status were significantly  
57  
58

1  
2  
3  
4  
5 associated with SROH. Poor SROH was more prevalent in men, older age-groups, blue  
6 collar workers, precarious workers, as well as those with lower income, lower wealth,  
7  
8 lower educational attainment, higher childhood poverty, lower social support, higher  
9 stress and longer working hours.  
10  
11  
12

13  
14 Table 2 shows the sex- and age- adjusted odds ratios and 95% CI for the  
15 associations between various indicators of SEP (occupation, income, wealth, education,  
16 and two indicators of childhood SEP) and poor SROH. All indicators of SEP were  
17 inversely associated with SROH. Blue collar workers had significantly higher OR of  
18 poor SROH (1.44, 95% CI: 1.07-1.95). Educational attainment, current income, wealth  
19 and SEP during childhood were also associated with poor SROH.  
20  
21  
22  
23  
24  
25

26  
27 Table 3 describes crude ORs and 95% CI for associations between  
28 workplace-related factors (job stress, social support in workplace, working hour and  
29 type of employment) and poor SROH. All of the factors were associated with poor SROH.  
30 Workers with the most stress as well as low social support had higher odds of poor  
31 SROH compared with those with less job stress or more social support. Those who  
32 reported working more than 60 hours per week had poorer SROH than those who  
33 worked 40-50 hours per week (OR: 1.69, 95%CI 1.20-2.39). Precarious workers had  
34 higher OR for poor oral health (1.32, 95% CI: 1.11-1.57), compared with permanent  
35 workers.  
36  
37  
38  
39  
40  
41  
42  
43  
44  
45

46 Table 4 shows the multivariate ORs and 95% CI for poor SROH. The  
47 associations between occupational class and poor SROH were substantially attenuated  
48 by work-related factors. Approximately 60% of the association between occupations and  
49 poor SROH was explained by the work-related factors.<sup>27</sup> In the multivariate model, all  
50 of the workplace-related factors (social support, job stress, type of employment and  
51 working hours) were significantly associated with poor SROH.  
52  
53  
54  
55  
56  
57  
58  
59  
60

## Discussion

In the present study, we found oral health disparity across various indicators of SEP as well as childhood SEP among workers in Japan. Moreover, the association between occupations and SROH was substantially explained by job-related factors.

Our finding is notable for demonstrating oral health disparities even in a society, where citizens have access to dental services with relatively low out-of-pocket cost. Our findings are consistent with a previous study by Morita et al., which reported that there were clear oral health disparities across occupations.<sup>15</sup> We found oral health disparities across occupations as well as other indicators of SEP, including income, wealth, and childhood SEP. Tsakos, et al. reported social gradients across occupation, income, wealth and parental occupation, among older individuals in England.<sup>16</sup>

One reason why people with higher SEP had better SROH may be related to preventive practices – e.g. dental flossing or use of interdental brush (interproximal brush). Neamatol et al. reported that students with doctorate or masters degrees flossed more than those with bachelor degree or less<sup>28</sup>, while Tseveenjav et al. reported that people with higher educational attainment performed cleaning more than the others.<sup>29</sup> Another reason people in higher SEP had better SROH might be utilization of preventive dentistry. People with lower incomes tend to use preventive dental service less frequently<sup>30, 31</sup>, and the difference of use in preventive service might explain the social gradient of SROH. In fact, in the present study, approximately one in three participants (32.3%) among the richest group made a preventive dental clinic visit in the past year, whereas only one in four participants (24.7%) among the poorest group did so. On the other hand, we did not observe a big difference among rich and poor participants in the use of dental services for treatment; 42.3% for the richest group

1  
2  
3  
4  
5  
6 versus 41.4% for the poorest group. Thus, the pathway from lower household income to  
7  
8 poor SROH might be through preventive dental service utilization.  
9

10 Our findings add to the previous literature by suggesting that occupational  
11  
12 inequalities in oral health can be substantially explained by work-based factors, such as,  
13  
14 social support in the workplace, job stress, working hours, and type of employment  
15  
16 (precarious vs. permanent). These workplace-related factors might be targets for  
17  
18 interventions to mitigate oral health disparities, i.e. in addition to intervening to  
19  
20 improve socioeconomic conditions, it may be possible focus on working conditions to  
21  
22 reduce oral health disparities.  
23

24 Social support has been reported to have a “stress-buffering effect” on  
25  
26 cardiovascular diseases.<sup>32-34</sup> Stress has been reported as one of the exacerbating factors  
27  
28 for periodontitis or gingivitis. Hugo FN et al. reported that stress was a significant risk  
29  
30 factor for gingivitis<sup>19</sup>, and Krejci CB, et al. suggested that stress may hasten the  
31  
32 development and progression of periodontitis through the suppression of T-cell activity  
33  
34 or a reduction in salivary IgA.<sup>17, 18</sup> Precarious employment was also significantly  
35  
36 associated with poor SROH in the multivariate model. Previous studies on precarious  
37  
38 employment showed that this form of work is associated with job insecurity and  
39  
40 psychological distress<sup>35, 36</sup>, and, therefore, being in a precarious employment might also  
41  
42 a risk factor of developing periodontitis or gingivitis via stress. The number of  
43  
44 precarious employees has been increasing all over the world as well as in Japan. In  
45  
46 Japan 35.2% of total workers in 2012 were precarious workers, while only 16.4% were in  
47  
48 1985.<sup>37</sup>  
49  
50  
51

52 Previous studies have suggested a consistent link between early life-course  
53  
54 socioeconomic circumstances and health status in adulthood.<sup>3, 38, 39</sup> Our study is  
55  
56 consistent with previous research in showing an association between childhood SEP and  
57  
58  
59  
60

1  
2  
3  
4  
5  
6 oral health. Poulton R et al. examined 1,000 children in New Zealand and found that  
7  
8 there was a clear social gradient of dental health (tooth cleanliness, gingival bleeding,  
9  
10 periodontal disease, and tooth decay) across childhood SEP.<sup>3</sup> In our study, when poverty  
11  
12 during the childhood at age five or fifteen was added to the multivariate model, both  
13  
14 poverty during childhood at age five and at age fifteen were associated with poorer  
15  
16 SROH (OR: 1.60, 95%CI: 1.23-2.08 at age five, and OR: 1.47, 95%CI: 1.15-1.87 at age  
17  
18 fifteen, respectively, not shown in tables). These two factors seemed to be independently  
19  
20 associated with SROH, because coefficients of the other covariates in the multivariate  
21  
22 model hardly changed before and after adding the childhood poverty variables to the  
23  
24 multivariate model. Therefore, poverty during childhood appears to affect SROH in  
25  
26 adulthood separately from sex, age, and the current workplace-related factors.  
27  
28  
29  
30

### 31 · Limitations

32  
33 There are some limitations in this study. First, SROH is a subjective  
34  
35 measurement. Some might argue that this type of measurement might be invalid,  
36  
37 however, self-rated oral health has been examined and reported to be a well-validated  
38  
39 and reliable index.<sup>22, 23</sup> Jones JA et al. validated the association between a single-item  
40  
41 self-report question and oral clinical examination among two hundred thirty-two  
42  
43 community-dwelling participants. The question was *“How would you describe the*  
44  
45 *health of your teeth and gums? Would you say it is excellent, very good, good, fair or*  
46  
47 *poor?”*. They reported that the single-item self-reported question had a sensitivity of  
48  
49 0.75 and a specificity of 0.67 in identifying persons with severe need for denture care,  
50  
51 compared with the clinical examination.<sup>22</sup> Secondly, the response rate was low. However,  
52  
53 Takada et. al. compared the collected sample with the vital statistics in Census 2010 of  
54  
55 the target population and reported that the obtained sample was properly equivalent  
56  
57  
58  
59  
60

1  
2  
3  
4  
5  
6 with respect to age, sex, and education<sup>21</sup>. Therefore, it is likely that the results of the  
7  
8 present study could be generalizable to the target population. Thirdly, the data used in  
9  
10 this study was cross-sectional, not longitudinal, therefore, we cannot infer causality.  
11  
12 Thus, low SEP could cause worse oral health; but the reverse is also possible, i.e. it is  
13  
14 well described that poor dental status can lead to social stigma and adversely impact  
15  
16 people's chances of employment and success in life.<sup>40</sup> Fourthly, we did not gather data  
17  
18 on brushing frequency or use of interdental brush/dental flossing<sup>29</sup>, and we could not  
19  
20 include these factors in the analysis. Some studies reported that people with lower  
21  
22 educational attainment or low income use interdental brush/dental flossing less, and  
23  
24 this might explain the association between SEPs and poorer SROH. Finally, the  
25  
26 questions which were used to evaluate job stress or social support in workplace were not  
27  
28 validated although BJSQ, from which questions on social support and job stress were  
29  
30 derived, have been well-validated.<sup>25</sup> Future studies should employ well-validated  
31  
32 questions on job stress and social support.  
33  
34  
35  
36

### 37 **Conclusion**

38  
39 We found oral health disparities across various SEPs, and that  
40  
41 workplace-related factors substantially explained the association between occupations  
42  
43 and SROH. Improving workplace environments may present a viable solution to reduce  
44  
45 oral health disparities. Future studies on the effect of workplace-related factors on oral  
46  
47 health should use longitudinal data to elucidate the causal association between the  
48  
49 workplace-related factors and oral health.  
50  
51  
52  
53  
54  
55

### 56 **Acknowledgments**

1  
2  
3  
4  
5  
6 The authors thank Prof. Hideki Hashimoto, Prof. Norito Kawakami and their  
7  
8 team for providing us with data from the Japanese Study of Stratification, Health,  
9  
10 Income, and Neighborhood (J-SHINE). The authors also thank Dr. Akiomi Inoue and Dr.  
11  
12 Hiroshi Kanbayashi for his valuable advice.  
13

14  
15  
16  
17  
18 **Funding statement:**  
19

20 This work was supported by a Grant-in-Aid for Scientific Research on  
21  
22 Innovative Areas 2009-2013 (No. 21119002, No. 21119001 and 21119007) from the  
23  
24 Ministry of Education, Culture, Sports, Science and Technology, Japan. T Tsuboya is  
25  
26 supported by Grant-in-Aid for Epidemiological Research (St. Luke's Life Science  
27  
28 Institute). These sponsors were not involved in study design and the collection, analysis,  
29  
30 and interpretation of data and the writing of the article and the decision to submit it for  
31  
32 publication.  
33  
34  
35  
36  
37

38 **Competing interest:** None declared.  
39  
40

41  
42 **Contributorship statement:**  
43

44 All authors participated in conceptualizing the study, interpreting the data,  
45  
46 and writing and critically reviewing the article. T. Tsuboya conducted data analysis and  
47  
48 led the writing of the article.  
49  
50  
51  
52  
53  
54  
55  
56  
57  
58  
59  
60

Table 1. Characteristics of participants by status of self-rated oral health (SROH) among 3,201 men and women aged 25-50 years old in Japan during 2010-2011

| Characteristic                                                     | Poor SROH <sup>†</sup> |        | <i>p-value</i> * |
|--------------------------------------------------------------------|------------------------|--------|------------------|
|                                                                    | n                      | (%)    |                  |
| Sex                                                                |                        |        |                  |
| Men                                                                | 529                    | (29.7) | 0.0002           |
| Women                                                              | 334                    | (23.8) |                  |
| Age                                                                |                        |        |                  |
| 25-29                                                              | 132                    | (22.5) | 0.0001           |
| 30-34                                                              | 138                    | (25.0) |                  |
| 35-39                                                              | 173                    | (27.2) |                  |
| 40-44                                                              | 175                    | (25.8) |                  |
| 45-50                                                              | 225                    | (33.8) |                  |
| Marital status                                                     |                        |        |                  |
| Married                                                            | 597                    | (27.9) | 0.14             |
| Single                                                             | 269                    | (25.5) |                  |
| Occupations                                                        |                        |        |                  |
| Specialists                                                        | 83                     | (28.0) | 0.0009           |
| White collar workers                                               | 497                    | (24.9) |                  |
| Blue collar workers                                                | 287                    | (31.5) |                  |
| Annual household income                                            |                        |        |                  |
| Less than 5 million JPY (Approximately GBD 29,400) ‡               | 226                    | (32.3) | 0.0012           |
| 5-7.5 million JPY (Approximately GBD 29,400-44,100) ‡              | 179                    | (26.6) |                  |
| More than 7.5 mil JPY (Approximately GBD 44,100) ‡                 | 250                    | (24.3) |                  |
| Wealth                                                             |                        |        |                  |
| Less than 3 million JPY (Approximately GBD 17,600) ‡               | 201                    | (34.7) | <.0001           |
| 3-5 million JPY (Approximately GBD 17,600-29,400) ‡                | 169                    | (30.2) |                  |
| More than 5 million JPY (Approximately GBD 29,400) ‡               | 173                    | (22.9) |                  |
| Education                                                          |                        |        |                  |
| High school or less                                                | 263                    | (36.3) | <.0001           |
| Vocational/junior college                                          | 262                    | (26.9) |                  |
| University or more                                                 | 333                    | (22.7) |                  |
| Economic situation at home when respondents were five years old    |                        |        |                  |
| Poor, very poor                                                    | 226                    | (34.8) | <.0001           |
| Normal                                                             | 502                    | (25.7) |                  |
| Well-off, very well-off                                            | 133                    | (23.5) |                  |
| Economic situation at home when respondents were fifteen years old |                        |        |                  |
| Poor, very poor                                                    | 216                    | (35.9) | <.0001           |
| Normal                                                             | 467                    | (24.8) |                  |
| Well-off, very well-off                                            | 180                    | (25.9) |                  |



|    |                               |     |        |        |
|----|-------------------------------|-----|--------|--------|
| 1  | Job stress                    |     |        |        |
| 2  | 1st tertile(least stressful)  | 289 | (25.2) |        |
| 3  | 2nd tertile                   | 272 | (25.2) | 0.0017 |
| 4  | 3rd tertile(most stressful)   | 300 | (31.3) |        |
| 5  | Social support in workplace   |     |        |        |
| 6  | 1st tertile(most supportive)  | 266 | (23.4) |        |
| 7  | 2nd tertile                   | 278 | (29.1) | 0.0014 |
| 8  | 3rd tertile(least supportive) | 295 | (29.8) |        |
| 9  | Working hours per week        |     |        |        |
| 10 | <40                           | 360 | (26.7) |        |
| 11 | 40-50                         | 162 | (23.5) |        |
| 12 | 50-60                         | 81  | (26.3) | 0.027  |
| 13 | >60                           | 67  | (34.2) |        |
| 14 | Type of employment            |     |        |        |
| 15 | Permanent                     | 526 | (25.3) |        |
| 16 | Precarious                    | 272 | (30.9) | 0.0083 |
| 17 | Self-employed                 | 66  | (27.3) |        |

\* P-value was calculated by chi-squared test.

† The status of SROH was determined by the question: "Overall, how would you rate the health of your teeth and gums?". "Poor SROH" includes respondents of "not so good" and "poor", and "Good SROH" includes respondents of "excellent", "good" and "fair"

‡ Income and wealth were converted at 170 JPY (Japanese Yen) to 1 GBP (Great Britain Pound).

Table 2. Age- and sex- adjusted odds ratios and 95% confidence intervals for associations between socioeconomic positions and poor self-rated oral health among 3,201 men and women aged 25-50 years old in Japan during 2010-2011.

| Independent variable                                                      | odds ratio | 95% confidence interval | <i>p</i> -value |
|---------------------------------------------------------------------------|------------|-------------------------|-----------------|
| <b>Occupations</b>                                                        |            |                         |                 |
| Professionals                                                             | 1.00       |                         |                 |
| Office workers                                                            | 1.05       | ( 0.79 - 1.39 )         | 0.75            |
| Blue collar workers                                                       | 1.44       | ( 1.07 - 1.95 )         | 0.017           |
| <b>Household income</b>                                                   |            |                         |                 |
| Low                                                                       | 1.72       | ( 1.38 - 2.16 )         | <.0001          |
| Middle                                                                    | 1.18       | ( 0.94 - 1.48 )         | 0.15            |
| High                                                                      | 1.00       |                         |                 |
| <b>Wealth</b>                                                             |            |                         |                 |
| Low                                                                       | 1.93       | ( 1.51 - 2.46 )         | <.0001          |
| Middle                                                                    | 1.55       | ( 1.20 - 1.99 )         | 0.0007          |
| High                                                                      | 1.00       |                         |                 |
| <b>Educational attainment</b>                                             |            |                         |                 |
| Low                                                                       | 1.98       | ( 1.63 - 2.42 )         | <.0001          |
| Middle                                                                    | 1.38       | ( 1.14 - 1.68 )         | 0.0012          |
| High                                                                      | 1.00       |                         |                 |
| <b>Economic situation at home when respondents were five years old</b>    |            |                         |                 |
| Poor, very poor                                                           | 1.61       | ( 1.25 - 2.08 )         | 0.0003          |
| Normal                                                                    | 1.07       | ( 0.86 - 1.34 )         | 0.55            |
| Well-off, very well-off                                                   | 1.00       |                         |                 |
| <b>Economic situation at home when respondents were fifteen years old</b> |            |                         |                 |
| Poor, very poor                                                           | 1.53       | ( 1.20 - 1.95 )         | 0.0006          |
| Normal                                                                    | 0.91       | ( 0.74 - 1.11 )         | 0.33            |
| Well-off, very well-off                                                   | 1.00       |                         |                 |

Table 3. Crude odds ratios and 95% confidence intervals for associations between workplace-related factors and poor self-rated oral health among 3,201 men and women aged 25-50 years old in Japan during 2010-2011.

| Independent variable          | odds ratio | 95% confidence interval | <i>p</i> -value |
|-------------------------------|------------|-------------------------|-----------------|
| Job stress                    |            |                         |                 |
| 1st tertile(least stressful)  | 1.00       |                         |                 |
| 2nd tertile                   | 1.00       | ( 0.83 - 1.21 )         | 0.99            |
| 3rd tertile(most stressful)   | 1.36       | ( 1.12 - 1.64 )         | 0.0018          |
| Social support in workplace   |            |                         |                 |
| 1st tertile(most supportive)  | 1.00       |                         |                 |
| 2nd tertile                   | 1.34       | ( 1.10 - 1.63 )         | 0.0033          |
| 3rd tertile(least supportive) | 1.39       | ( 1.14 - 1.68 )         | 0.001           |
| Working hours per week        |            |                         |                 |
| <40                           | 1.19       | ( 0.96 - 1.47 )         | 0.12            |
| 40-50                         | 1.00       |                         |                 |
| 50-60                         | 1.16       | ( 0.85 - 1.58 )         | 0.34            |
| >60                           | 1.69       | ( 1.20 - 2.39 )         | 0.0027          |
| Type of employment            |            |                         |                 |
| Permanent                     | 1.00       |                         |                 |
| Precarious                    | 1.32       | ( 1.11 - 1.57 )         | 0.002           |
| Self-employed                 | 1.10       | ( 0.82 - 1.49 )         | 0.52            |

Table 4. Multivariate odds ratios and 95% confidence intervals for associations with poor self-rated oral health among 3,201 men and women aged 25-50 years old in Japan during 2010-2011

| Independent variable               | odds ratio | 95% confidence interval | <i>p</i> -value |
|------------------------------------|------------|-------------------------|-----------------|
| <b>Occupations</b>                 |            |                         |                 |
| Professionals                      | 1.00       |                         |                 |
| Office workers                     | 0.96       | ( 0.72 - 1.29 )         | 0.79            |
| Blue collar workers                | 1.18       | ( 0.86 - 1.61 )         | 0.31            |
| <b>Sex</b>                         |            |                         |                 |
| Men                                | 1.61       | ( 1.32 - 1.96 )         | <.0001          |
| Women                              | 1.00       |                         |                 |
| <b>Age</b>                         |            |                         |                 |
| 25-29                              | 0.86       | ( 0.65 - 1.14 )         | 0.29            |
| 30-34                              | 1.00       |                         |                 |
| 35-39                              | 1.10       | ( 0.85 - 1.44 )         | 0.46            |
| 40-44                              | 1.00       | ( 0.77 - 1.30 )         | 0.98            |
| 45-50                              | 1.52       | ( 1.17 - 1.98 )         | 0.0016          |
| <b>Marital status</b>              |            |                         |                 |
| Married                            | 1.00       |                         |                 |
| Single                             | 0.99       | ( 0.82 - 1.19 )         | 0.91            |
| <b>Job stress</b>                  |            |                         |                 |
| 1st tertile(least stressful)       | 1.00       |                         |                 |
| 2nd tertile                        | 0.96       | ( 0.79 - 1.17 )         | 0.66            |
| 3rd tertile(most stressful)        | 1.25       | ( 1.02 - 1.54 )         | 0.03            |
| <b>Social support in workplace</b> |            |                         |                 |
| 1st tertile(most supportive)       | 1.00       |                         |                 |
| 2nd tertile                        | 1.25       | ( 1.02 - 1.52 )         | 0.031           |
| 3rd tertile(least supportive)      | 1.24       | ( 1.01 - 1.51 )         | 0.039           |
| <b>Working hours per week</b>      |            |                         |                 |
| <40                                | 1.15       | ( 0.92 - 1.45 )         | 0.23            |
| 40-50                              | 1.00       |                         |                 |
| 50-60                              | 1.05       | ( 0.76 - 1.44 )         | 0.78            |
| >60                                | 1.48       | ( 1.04 - 2.11 )         | 0.031           |
| <b>Type of employment</b>          |            |                         |                 |
| Permanent                          | 1.00       |                         |                 |
| Precarious                         | 1.52       | ( 1.22 - 1.90 )         | 0.0002          |
| Self-employed                      | 1.11       | ( 0.80 - 1.54 )         | 0.53            |

## References

1. Murray CJ, Vos T, Lozano R, et al. Disability-adjusted life years (DALYs) for 291 diseases and injuries in 21 regions, 1990-2010: a systematic analysis for the Global Burden of Disease Study 2010. *Lancet* 2012; **380**(9859): 2197-223.
2. Marcenes W, Kassebaum NJ, Bernabe E, et al. Global burden of oral conditions in 1990-2010: a systematic analysis. *Journal of dental research* 2013; **92**(7): 592-7.
3. Poulton R, Caspi A, Milne BJ, et al. Association between children's experience of socioeconomic disadvantage and adult health: a life-course study. *Lancet* 2002; **360**(9346): 1640-5.
4. Sabbah W, Tsakos G, Chandola T, et al. Social gradients in oral and general health. *Journal of dental research* 2007; **86**(10): 992-6.
5. Sabbah W, Watt RG, Sheiham A, et al. Effects of allostatic load on the social gradient in ischaemic heart disease and periodontal disease: evidence from the Third National Health and Nutrition Examination Survey. *Journal of epidemiology and community health* 2008; **62**(5): 415-20.
6. Sabbah W, Tsakos G, Sheiham A, et al. The role of health-related behaviors in the socioeconomic disparities in oral health. *Social science & medicine* 2009; **68**(2): 298-303.
7. Aida J, Kondo K, Yamamoto T, et al. Oral health and cancer, cardiovascular, and respiratory mortality of Japanese. *Journal of dental research* 2011; **90**(9): 1129-35.

- 1  
2  
3  
4  
5  
6 8. Polzer I, Schwahn C, Volzke H, et al. The association of tooth loss with all-cause  
7  
8 and circulatory mortality. Is there a benefit of replaced teeth? A systematic review and  
9  
10 meta-analysis. *Clinical oral investigations* 2012; **16**(2): 333-51.  
11  
12  
13  
14 9. Berkman LF, Kawachi I. Social Epidemiology. 1st edition ed ed: Oxford University  
15  
16 Press, USA; 2000.  
17  
18  
19 10. Drury TF, Garcia I, Adesanya M. Socioeconomic disparities in adult oral health in  
20  
21 the United States. *Annals of the New York Academy of Sciences* 1999; **896**: 322-4.  
22  
23  
24 11. Astrom AN, Haugejorden O, Skaret E, et al. Oral Impacts on Daily Performance in  
25  
26 Norwegian adults: the influence of age, number of missing teeth, and socio-demographic  
27  
28 factors. *European journal of oral sciences* 2006; **114**(2): 115-21.  
29  
30  
31  
32 12. Lopez R, Fernandez O, Baelum V. Social gradients in periodontal diseases among  
33  
34 adolescents. *Community dentistry and oral epidemiology* 2006; **34**(3): 184-96.  
35  
36  
37  
38 13. Tsakos G, Sheiham A, Iliffe S, et al. The impact of educational level on oral  
39  
40 health-related quality of life in older people in London. *European journal of oral sciences*  
41  
42 2009; **117**(3): 286-92.  
43  
44  
45  
46 14. Morita I, Nakagaki H, Yoshii S, et al. Gradients in periodontal status in Japanese  
47  
48 employed males. *Journal of clinical periodontology* 2007; **34**(11): 952-6.  
49  
50  
51  
52 15. Morita I, Nakagaki H, Yoshii S, et al. Is there a gradient by job classification in  
53  
54 dental status in Japanese men? *European journal of oral sciences* 2007; **115**(4): 275-9.  
55  
56  
57  
58 16. Tsakos G, Demakakos P, Breeze E, et al. Social gradients in oral health in older  
59  
60

adults: findings from the English longitudinal survey of aging. *American journal of public health* 2011; **101**(10): 1892-9.

17. Seymour GJ. Importance of the host response in the periodontium. *Journal of clinical periodontology* 1991; **18**(6): 421-6.

18. Krejci CB, Bissada NF. Periodontitis--the risks for its development. *General dentistry* 2000; **48**(4): 430-6; quiz 7-8.

19. Hugo FN, Hilgert JB, Bozzetti MC, et al. Chronic stress, depression, and cortisol levels as risk indicators of elevated plaque and gingivitis levels in individuals aged 50 years and older. *Journal of periodontology* 2006; **77**(6): 1008-14.

20. Doyle CJ, Bartold PM. How does stress influence periodontitis? *Journal of the International Academy of Periodontology* 2012; **14**(2): 42-9.

21. Takada M Kondo N, Hashimoto H, for the J-SHINE Data Management Committee. Japanese Study on Stratification, Health, Income, and Neighborhood: Study Protocol and Profiles of Participants. *Journal of Epidemiology* 2014.(accepted)

22. Jones JA, Spiro A, 3rd, Miller DR, et al. Need for dental care in older veterans: assessment of patient-based measures. *Journal of the American Geriatrics Society* 2002; **50**(1): 163-8.

23. Jones JA, Kressin NR, Miller DR, et al. Comparison of patient-based oral health outcome measures. *Quality of life research : an international journal of quality of life aspects of treatment, care and rehabilitation* 2004; **13**(5): 975-85.

- 1  
2  
3  
4  
5  
6 24. Grusky DB, Yoshimichi Sato, Jan O. Jonsson, et al. Social Mobility in Japan: A  
7  
8 New Approach to Modeling Trend in Mobility. 2008.  
9  
10 [http://www.stanford.edu/group/scspi/grusky/article\\_files/social\\_mobility\\_japan.pdf](http://www.stanford.edu/group/scspi/grusky/article_files/social_mobility_japan.pdf) Accessed  
11  
12 Apr 15th 2014.  
13  
14  
15  
16 25. Inoue A, Kawakami N, Shimomitsu T, et al. Development of a Short Questionnaire  
17  
18 to Measure an Extended Set of Job Demands, Job Resources, and Positive Health Outcomes:  
19  
20 The New Brief Job Stress Questionnaire. *Industrial health* 2014.(epub ahead)  
21  
22  
23  
24 26. Kato S, Doi Y, Tsutsui S, et al. [Job stress among Japan Overseas Cooperation  
25  
26 volunteers--using the Brief Job Stress Questionnaire]. *Sangyo eiseigaku zasshi = Journal of*  
27  
28 *occupational health* 2004; **46**(6): 191-200.  
29  
30  
31  
32 27. Szklo M, Nieto FJ. *Epidemiology: beyond the basics*: Aspen Publishers, Inc;  
33  
34 2000:186.  
35  
36  
37 28. Neamatollahi H, Ebrahimi M. Oral health behavior and its determinants in a  
38  
39 group of Iranian students. *Indian journal of dental research : official publication of Indian*  
40  
41 *Society for Dental Research* 2010; **21**(1): 84-8.  
42  
43  
44  
45 29. Tseveenjav B, Suominen-Taipale L, Varsio S, et al. Patterns of oral cleaning habits  
46  
47 and use of fluoride among dentate adults in Finland. *Oral health & preventive dentistry*  
48  
49 2010; **8**(3): 287-94.  
50  
51  
52  
53 30. Pizarro V, Ferrer M, Domingo-Salvany A, et al. The utilization of dental care  
54  
55 services according to health insurance coverage in Catalonia (Spain). *Community dentistry*  
56  
57  
58  
59  
60



1  
2  
3  
4  
5  
6  
7  
8  
9  
10  
11  
12  
13  
14  
15  
16  
17  
18  
19  
20  
21  
22  
23  
24  
25  
26  
27  
28  
29  
30  
31  
32  
33  
34  
35  
36  
37  
38  
39  
40  
41  
42  
43  
44  
45  
46  
47  
48  
49  
50  
51  
52  
53  
54  
55  
56  
57  
58  
59  
60

*and oral epidemiology* 2009; **37**(1): 78-84.

31. Chi DL, Rossitch KC, Beeles EM. Developmental delays and dental caries in low-income preschoolers in the USA: a pilot cross-sectional study and preliminary explanatory model. *BMC oral health* 2013; **13**: 53.

32. Gerin W, Milner D, Chawla S, et al. Social support as a moderator of cardiovascular reactivity in women: a test of the direct effects and buffering hypotheses. *Psychosomatic medicine* 1995; **57**(1): 16-22.

33. Uchino BN, Cacioppo JT, Kiecolt-Glaser JK. The relationship between social support and physiological processes: a review with emphasis on underlying mechanisms and implications for health. *Psychological bulletin* 1996; **119**(3): 488-531.

34. Uchino BN. Social support and health: a review of physiological processes potentially underlying links to disease outcomes. *Journal of behavioral medicine* 2006; **29**(4): 377-87.

35. Tsurugano S, Inoue M, Yano E. Precarious employment and health: analysis of the Comprehensive National Survey in Japan. *Industrial health* 2012; **50**(3): 223-35.

36. Vives A, Amable M, Ferrer M, et al. Employment precariousness and poor mental health: evidence from Spain on a new social determinant of health. *Journal of environmental and public health* 2013; **2013**: 978656.

37. Ministry of Health, Labour and Welfare. Current situation on precarious workers (in Japanese).

[http://www.mhlw.go.jp/seisakunitsuite/bunya/koyou\\_roudou/part\\_haken/genjou/](http://www.mhlw.go.jp/seisakunitsuite/bunya/koyou_roudou/part_haken/genjou/) Accessed

Apr 15th 2014.

38. Lynch JW, Kaplan GA, Cohen RD, et al. Childhood and adult socioeconomic status as predictors of mortality in Finland. *Lancet* 1994; **343**(8896): 524-7.

39. Black RE, Victora CG, Walker SP, et al. Maternal and child undernutrition and overweight in low-income and middle-income countries. *Lancet* 2013; **382**(9890): 427-51.

40. Horton S, Barker JC. Stigmatized biologies: Examining the cumulative effects of oral health disparities for Mexican American farmworker children. *Medical anthropology quarterly* 2010; **24**(2): 199-219.

STROBE 2007 (v4) Statement—Checklist of items that should be included in reports of *cross-sectional studies*

| Section/Topic                | Item # | Recommendation                                                                                                                                                                       | Reported on page # |
|------------------------------|--------|--------------------------------------------------------------------------------------------------------------------------------------------------------------------------------------|--------------------|
| Title and abstract           | 1      | (a) Indicate the study's design with a commonly used term in the title or the abstract                                                                                               | #2                 |
|                              |        | (b) Provide in the abstract an informative and balanced summary of what was done and what was found                                                                                  | #2                 |
| <b>Introduction</b>          |        |                                                                                                                                                                                      |                    |
| Background/rationale         | 2      | Explain the scientific background and rationale for the investigation being reported                                                                                                 | #4-5               |
| Objectives                   | 3      | State specific objectives, including any prespecified hypotheses                                                                                                                     | #5                 |
| <b>Methods</b>               |        |                                                                                                                                                                                      |                    |
| Study design                 | 4      | Present key elements of study design early in the paper                                                                                                                              | #6                 |
| Setting                      | 5      | Describe the setting, locations, and relevant dates, including periods of recruitment, exposure, follow-up, and data collection                                                      | #6                 |
| Participants                 | 6      | (a) Give the eligibility criteria, and the sources and methods of selection of participants                                                                                          | #6                 |
| Variables                    | 7      | Clearly define all outcomes, exposures, predictors, potential confounders, and effect modifiers. Give diagnostic criteria, if applicable                                             | #6-9               |
| Data sources/<br>measurement | 8*     | For each variable of interest, give sources of data and details of methods of assessment (measurement). Describe comparability of assessment methods if there is more than one group | #6-9               |
| Bias                         | 9      | Describe any efforts to address potential sources of bias                                                                                                                            | #6                 |
| Study size                   | 10     | Explain how the study size was arrived at                                                                                                                                            | #6                 |
| Quantitative variables       | 11     | Explain how quantitative variables were handled in the analyses. If applicable, describe which groupings were chosen and why                                                         | #6-9               |
| Statistical methods          | 12     | (a) Describe all statistical methods, including those used to control for confounding                                                                                                | #9                 |
|                              |        | (b) Describe any methods used to examine subgroups and interactions                                                                                                                  | not applicable     |
|                              |        | (c) Explain how missing data were addressed                                                                                                                                          | #9                 |
|                              |        | (d) If applicable, describe analytical methods taking account of sampling strategy                                                                                                   | not applicable     |
|                              |        | (e) Describe any sensitivity analyses                                                                                                                                                | not applicable     |
| <b>Results</b>               |        |                                                                                                                                                                                      |                    |

|                          |     |                                                                                                                                                                                                              |                |
|--------------------------|-----|--------------------------------------------------------------------------------------------------------------------------------------------------------------------------------------------------------------|----------------|
| Participants             | 13* | (a) Report numbers of individuals at each stage of study—eg numbers potentially eligible, examined for eligibility, confirmed eligible, included in the study, completing follow-up, and analysed            | #11            |
|                          |     | (b) Give reasons for non-participation at each stage                                                                                                                                                         | #6             |
|                          |     | (c) Consider use of a flow diagram                                                                                                                                                                           | not applicable |
| Descriptive data         | 14* | (a) Give characteristics of study participants (eg demographic, clinical, social) and information on exposures and potential confounders                                                                     | #11            |
|                          |     | (b) Indicate number of participants with missing data for each variable of interest                                                                                                                          | #11            |
| Outcome data             | 15* | Report numbers of outcome events or summary measures                                                                                                                                                         | #11            |
| Main results             | 16  | (a) Give unadjusted estimates and, if applicable, confounder-adjusted estimates and their precision (eg, 95% confidence interval). Make clear which confounders were adjusted for and why they were included | #11-12         |
|                          |     | (b) Report category boundaries when continuous variables were categorized                                                                                                                                    | not applicable |
|                          |     | (c) If relevant, consider translating estimates of relative risk into absolute risk for a meaningful time period                                                                                             | not applicable |
| Other analyses           | 17  | Report other analyses done—eg analyses of subgroups and interactions, and sensitivity analyses                                                                                                               | not applicable |
| <b>Discussion</b>        |     |                                                                                                                                                                                                              |                |
| Key results              | 18  | Summarise key results with reference to study objectives                                                                                                                                                     | #13            |
| Limitations              | 19  | Discuss limitations of the study, taking into account sources of potential bias or imprecision. Discuss both direction and magnitude of any potential bias                                                   | #13-16         |
| Interpretation           | 20  | Give a cautious overall interpretation of results considering objectives, limitations, multiplicity of analyses, results from similar studies, and other relevant evidence                                   | #15-16         |
| Generalisability         | 21  | Discuss the generalisability (external validity) of the study results                                                                                                                                        | #16            |
| <b>Other information</b> |     |                                                                                                                                                                                                              |                |
| Funding                  | 22  | Give the source of funding and the role of the funders for the present study and, if applicable, for the original study on which the present article is based                                                | #18            |

\*Give information separately for cases and controls in case-control studies and, if applicable, for exposed and unexposed groups in cohort and cross-sectional studies.

**Note:** An Explanation and Elaboration article discusses each checklist item and gives methodological background and published examples of transparent reporting. The STROBE checklist is best used in conjunction with this article (freely available on the Web sites of PLoS Medicine at <http://www.plosmedicine.org/>, Annals of Internal Medicine at <http://www.annals.org/>, and Epidemiology at <http://www.epidem.com/>). Information on the STROBE Initiative is available at [www.strobe-statement.org](http://www.strobe-statement.org).

# BMJ Open

## Oral health disparities across socioeconomic position: the influence of economic difficulties in childhood and current work-related factors, from J-SHINE study

|                                 |                                                                                                                                                                                                                                                                                                                                                                                                                                                                                                                   |
|---------------------------------|-------------------------------------------------------------------------------------------------------------------------------------------------------------------------------------------------------------------------------------------------------------------------------------------------------------------------------------------------------------------------------------------------------------------------------------------------------------------------------------------------------------------|
| Journal:                        | <i>BMJ Open</i>                                                                                                                                                                                                                                                                                                                                                                                                                                                                                                   |
| Manuscript ID:                  | bmjopen-2014-005701.R1                                                                                                                                                                                                                                                                                                                                                                                                                                                                                            |
| Article Type:                   | Research                                                                                                                                                                                                                                                                                                                                                                                                                                                                                                          |
| Date Submitted by the Author:   | 19-Aug-2014                                                                                                                                                                                                                                                                                                                                                                                                                                                                                                       |
| Complete List of Authors:       | Tsuboya, Toru; Harvard School of Public Health, Social and Behavioral Science; Tohoku university, School of Dentistry<br>Aida, Jun; Tohoku University Graduate School of Dentistry, Department of International and Community Oral Health<br>Kawachi, Ichiro; Harvard School of Public Health,<br>Katase, Kazuo; Tohoku Gakuin University, Department Human Science, Faculty of Liberal Arts<br>Osaka, Ken; Tohoku University Graduate School of Dentistry, Department of International and Community Oral Health |
| <b>Primary Subject Heading</b>: | Occupational and environmental medicine                                                                                                                                                                                                                                                                                                                                                                                                                                                                           |
| Secondary Subject Heading:      | Dentistry and oral medicine                                                                                                                                                                                                                                                                                                                                                                                                                                                                                       |
| Keywords:                       | Epidemiology < TROPICAL MEDICINE, OCCUPATIONAL & INDUSTRIAL MEDICINE, PUBLIC HEALTH, SOCIAL MEDICINE                                                                                                                                                                                                                                                                                                                                                                                                              |
|                                 |                                                                                                                                                                                                                                                                                                                                                                                                                                                                                                                   |

SCHOLARONE™  
Manuscripts

only

**Title:**

Oral health disparities across socioeconomic position: the influence of economic difficulties in childhood and current work-related factors, from J-SHINE study

**Corresponding author:**

Full name: Toru Tsuboya

Postal address: 75 Saint Alphonsus Street Apt. #311, Boston, MA, 02120

Email: tsubo828@gmail.com

Tel: +1-617-283-9677

**Authors:** Toru Tsuboya<sup>1,2</sup>, Jun Aida<sup>2</sup>, Ichiro Kawachi<sup>1</sup>, Kazuo Katase<sup>3</sup>, Ken Osaka<sup>2</sup>

1: Harvard School of Public Health, Department of Social and Behavioral Sciences, Boston, USA

2: Tohoku University Graduate School of Dentistry, Department of International and Community Oral Health, Sendai, Japan

3: Tohoku Gakuin University, Department Human Science, Sendai, Japan

1  
2  
3  
4  
5  
6  
7  
8  
9  
10  
11  
12  
13  
14  
15  
16  
17  
18  
19  
20  
21  
22  
23  
24  
25  
26  
27  
28  
29  
30  
31  
32  
33  
34  
35  
36  
37  
38  
39  
40  
41  
42  
43  
44  
45  
46  
47  
48  
49  
50  
51  
52  
53  
54  
55  
56  
57  
58  
59  
60

1   **Abstract**

2   Objectives: We investigated the association between socioeconomic position (SEP) and  
3   oral health, and examined the associations of economic difficulties in childhood and  
4   workplace-related factors on the association.

5   Design: Cross-sectional study

6   Participants: A total of 3,201 workers aged 25-50 years old, living in and around Tokyo,  
7   Japan

8   Outcome measures: Self-rated oral health (SROH). A logistic regression model was used  
9   to estimate odds ratios (ORs) for the association between poor SROH and each indicator  
10   of SEP (annual household income, wealth, educational attainment, occupation, and  
11   economic situation in childhood). Multiple imputation was used to address missing  
12   values.

13   Results: Each indicator of SEP, including childhood SEP, was significantly inversely  
14   associated with SROH, and all of the workplace-related factors (social support in the  
15   workplace, job stress, working hours, and type of employment) were also significantly  
16   associated with SROH. Compared with professionals, blue collar workers had  
17   significantly higher OR of poor SROH, and, the association was substantially explained  
18   by the workplace-related factors; ORs ranged from 1.44 in the age- and sex- adjusted  
19   model to 1.18 in the multivariate model. Poverty during childhood at age five and at age  
20   fifteen were associated with poorer SROH, and these two factors seemed to be  
21   independently associated with SROH

22   Conclusions: We found oral health disparity across SEP among workers in Japan.  
23   Approximately 60% of the association between occupation and SROH was explained by  
24   job-related factors. Economic difficulties during childhood appear to affect SROH in  
25   adulthood separately from sex, age, and the current workplace-related factors.

1  
2  
3  
4  
5  
6 26 **Strengths and limitations of this study**  
7

8 27 · Previous studies have shown an association between socioeconomic positions  
9  
10 28 (SEP) in adulthood and oral health, however few have examined the relation between  
11  
12 29 SEP in childhood and oral health in adulthood.

13  
14 30 · Using cross-sectional data of 3,201 workers aged 25-50 years old in Japan, we  
15  
16 31 found evidence that economic difficulties during childhood as well as SEP in adulthood  
17  
18 32 independently appeared to affect self-rated oral health (SROH) in adulthood among  
19  
20 33 working men and women.

21  
22 34 · Workplace-related factors (social support in the workplace, job stress, working  
23  
24 35 hours, and type of employment) substantially explained the association between  
25  
26 36 occupation and SROH.

27  
28 37 · The response rate was low, however, the obtained sample was properly  
29  
30 38 equivalent with respect to age, sex, and education, compared with vital statistics in  
31  
32 39 Census 2010 of the target population.  
33  
34

35 40

36 41

37 42  
38  
39  
40  
41  
42  
43  
44  
45  
46  
47  
48  
49  
50  
51  
52  
53  
54  
55  
56  
57  
58  
59  
60



## 43 **Background**

44 Oral health problems, such as dental caries, periodontal disease, and  
45 edentulism, afflict more than half of the population of the planet (3.9 billion people) and  
46 untreated dental caries is the most prevalent condition (35% across all ages) among the  
47 291 conditions listed in the Global Burden of Disease 2010.<sup>1,2</sup> Using disability-adjusted  
48 life years (DALYs), which is an index of measuring disease burden in society, and is  
49 calculated as sum of years of life lost due to premature mortality and years lived with  
50 disability, Marcenes W, et al estimated that the global burden of oral conditions would  
51 increase by approximately 20% from 1990 to 2010.<sup>1,2</sup> In addition to their high  
52 prevalence, oral health conditions are a major contributor to socioeconomic disparities  
53 in health.<sup>3,4</sup>

54 Oral health reflects individuals' socioeconomic conditions as well as an  
55 important marker of future physical health conditions (e.g. cardiovascular disease).<sup>4-8</sup>  
56 The major indicators of socioeconomic positions (SEP) include income, wealth, education,  
57 and occupation.<sup>9</sup> SEP is associated not only with general health, but also with oral  
58 health. Some studies examined the associations between income/education and oral  
59 health; those who had higher income, or higher educational attainment had better oral  
60 health.<sup>10-14</sup> On the other hand, there are fewer studies on the association between  
61 occupational class and oral health. To our knowledge, only five previous studies  
62 examined the association between occupation and oral health.<sup>3, 15-18</sup> Poulton et al.  
63 examined the association of dental health (tooth cleanliness, gingival bleeding,  
64 periodontal disease and tooth decay) with combination of parental occupation in  
65 childhood with occupation in adulthood among 1,000 children in New Zealand; they  
66 reported significant social gradients among these oral conditions.<sup>3</sup> Sanders et al.  
67 examined data of 3,678 adults in Australia and reported that upper white collar

1  
2  
3  
4  
5  
6 68 workers reported less social impact, measured by the 14-item Oral Health Impact  
7  
8 69 Profile, than did workers in lower white-collar or blue-collar occupations.<sup>18</sup> Morita et al.  
9  
10 70 examined the association of occupations with oral conditions, based on approximately  
11  
12 71 16,000 Japanese workers; they reported that professionals had better oral conditions  
13  
14 72 than office workers and blue collar workers in Japan.<sup>15 16</sup> Tsakos et al. reported  
15  
16 73 significant social gradients in oral health, based on a sample of 6,600  
17  
18 74 community-dwelling English people aged 50 years and older.<sup>17</sup> However, none of these  
19  
20 75 considered workplace-related factors, such as social support, working hours, type of  
21  
22 76 employment or job stress, as potential mediators of the association between occupations  
23  
24 77 and oral health. Psychological stress is associated with the workplace-related factors as  
25  
26 78 well as occupations, and, on the other hand, oral diseases, such as periodontitis and  
27  
28 79 gingivitis, are also associated with psychological stress.<sup>19-22</sup> Therefore,  
29  
30 80 workplace-related factors may be candidates for mitigating oral health disparities. and,  
31  
32 81 we hypothesized that job stress (including work hours) – as well as stress-buffering  
33  
34 82 factors such as workplace social support – would mediate the association between  
35  
36 83 occupational class and oral health.

37  
38  
39 84 In this study, we first examined data of 3,201 workers aged 25-50 years old in  
40  
41 85 Japan to elucidate the associations between indicators of SEP (occupation, income  
42  
43 86 wealth, education and SEP in childhood) and oral health. We then examined the  
44  
45 87 mediation of socioeconomic disparities by workplace-related factors (social support in  
46  
47 88 workplace, job stress, working hours and type of employment).

48  
49  
50 89

## 51 52 90 **METHODS**

### 53 54 91 **Participants**

55  
56 92 We conducted the present study by using data from the J-SHINE (Japanese  
57  
58  
59  
60

1  
2  
3  
4  
5  
6 93 study of Stratification, Health, Income, and Neighborhood), the details of which have  
7  
8 94 been previously described.<sup>23</sup> In brief, between October 2010 and February 2011, 13,920  
9  
10 95 community-dwelling residents aged 25 to 50 years were probabilistically and randomly  
11  
12 96 selected from four municipalities in and around Tokyo, Japan, with using the Basic  
13  
14 97 Resident Registration System. Independent survey agencies were contracted to conduct  
15  
16 98 the surveys, and the professional surveyors who had more than three years of  
17  
18 99 experience in conducting interview-based social surveys made contacts with the eligible  
19  
20 100 individuals after attending training sessions to conduct the J-SHINE study. The main  
21  
22 101 reasons the surveyors were not able to receive responses from the eligible participants  
23  
24 102 were as follows: “inaccessible contact (n=4371)” and “refusal of invitation (n=3677)”. Of  
25  
26 103 those who were invited, 4,385 men and women responded (31.6%) to the invitation;  
27  
28 104 these individuals formed the baseline of the J-SHINE study. A questionnaire was  
29  
30 105 self-administered using a computer-assisted personal interview format, unless the  
31  
32 106 participants requested a face-to-face interview. We excluded participants who did not  
33  
34 107 answer the question about self-rated oral health, or who responded that they were not  
35  
36 108 active in the labor market (including homemakers and students); this result in 3,201  
37  
38 109 eligible participants.  
39  
40  
41  
42  
43

#### 44 111 Measurements

45  
46 112 All measures in this study were obtained by self-report. Basic demographic  
47  
48 113 variables included sex (men/women), age (categorized as 25-29, 30-34, 35-39, 40-44, and  
49  
50 114 45-50 years old), and marital status (categorized as married/not married). Self-rated  
51  
52 115 oral health (SROH) was used to evaluate oral conditions. SROH is a screening tool that  
53  
54 116 can evaluate needs of dental care among people, especially those who do not usually  
55  
56 117 visit dentists, and its validity and high internal consistency have been confirmed.<sup>24 25</sup>  
57  
58  
59  
60

1  
2  
3  
4  
5  
6 118 SROH was assessed by the following question. *“Overall, how would you rate the health*  
7  
8 119 *of your teeth and gums?”* Potential responses ranged from *“1.excellent, 2.good, 3.fair,*  
9  
10 120 *4.not so good or 5.poor”*. In the analysis, the outcome was dichotomized:”1.excellent and  
11  
12 121 2.good, 3.fair” as “Good SROH”, and “4.not so good and 5.poor” as “Poor SROH”.

14 122 As indicators of SEP, we used annual household income, wealth, educational  
15  
16 123 attainment, occupation, and economic situations during childhood. Annual household  
17  
18 124 income was divided into tertiles; less than JPY 5 million (Approximately GBP 29,400),  
19  
20 125 JPY 5 to 7.5 million (GBP 29,400-44,100), or more than JPY 7.5 million (GBP 44,100).  
21  
22 126 Wealth was based on household financial and other assets (e.g. stock, bond, and so on)  
23  
24 127 and was divided into tertiles; less than JPY 3 million (GBP 17,600), JPY 3 to 5 million  
25  
26 128 (GBP 17,600-29,400), or more than JPY 5 million (GBP 29,400). Educational attainment  
27  
28 129 was divided into three categories; high school or less, vocational/junior college, and  
29  
30 130 university or more. Occupational class was divided into three categories; professionals,  
31  
32 131 office workers or blue collar workers. Occupations were self-reported, but, in addition, a  
33  
34 132 sociologist on the team (K.K.) examined each response to determine the correct  
35  
36 133 classification based on the detailed job description provided by the participants. Our  
37  
38 134 method of occupational classification was previously used in “The national survey of  
39  
40 135 Social Stratification and social Mobility”, which has been conducted in Japan every ten  
41  
42 136 years since 1955 and is regarded as the most valid classification of occupations in  
43  
44 137 Japan.<sup>26</sup> Economic conditions in childhood were evaluated through the following  
45  
46 138 questions. *“How would you rate the economic conditions in your household at age five?”*  
47  
48 139 and *“How would you rate the economic conditions in your household at age fifteen?”* The  
49  
50 140 answers were selected from *“1.very difficult, 2. difficult, 3.normal, 4. well off 5. very well*  
51  
52 141 *off”*. In the analysis, the answers were divided into three groups: “1.very difficult, 2.  
53  
54 142 difficult”, “3.normal” and “4. well off 5. very well off”. This question was derived from  
55  
56  
57  
58  
59  
60

1  
2  
3  
4  
5  
6 143 the Comprehensive Survey of Living Conditions, which is annually conducted by the  
7  
8 144 Ministry of Health, Labour, and Welfare, and is regarded as a standard way to evaluate  
9  
10 145 subjective economic situation in Japan.

11  
12  
13 146 With regard to workplace-related factors, job stress, social support in  
14  
15 147 workplace, working hours, and type of employment were used. Job stress was evaluated  
16  
17 148 by seven questions, which were taken from the Brief Job Stress Questionnaire (BJSQ).  
18  
19 149 BJSQ has been validated for use with Japanese workers, and consists of lists the 84  
20  
21 150 questions which assesses job stress, social support in workplace and subjective  
22  
23 151 physical/mental symptoms.<sup>27</sup> BJSQ has been used in workplaces in Japan and was used  
24  
25 152 in previous research in Japan.<sup>27 28</sup> One example of the seven questions on the job stress  
26  
27 153 was *"I have to deal with a lot of tasks"*, and the answer was chosen from *"1.yes, 2.rather*  
28  
29 154 *yes 3.rather no, 4.no"*. Aggregated scores for the seven questions were divided into  
30  
31 155 tertiles. Social support in workplace consisted of six questions, which were also taken  
32  
33 156 from BJSQ. One example of six questions was *"How reliable is your boss when you are*  
34  
35 157 *in trouble?"*, and the answer was chosen from *"1.very, 2.fairly 3.to some extent, 4.not"*.  
36  
37 158 Aggregated scores for the six questions were divided into tertiles. Working hours were  
38  
39 159 divided into four groups: less than 40 hours per week, 40 to 50 hours per week, 50 to 60  
40  
41 160 hours per week, or more than 60 hours per week. Type of employment was divided into  
42  
43 161 three groups: permanent, precarious or self-employment.  
44  
45

46 162

47  
48 163 Statistical analysis

49  
50 164 Differences in background characteristics according to SROH (good or poor)  
51  
52 165 were compared using the chi-square test (Table1). We estimated logistic regression  
53  
54 166 models for the association between poor SROH and SEP. We computed sex- and age-  
55  
56 167 adjusted odds ratio (OR) and 95% confidence intervals (C.I.) for poor SROH among office  
57  
58  
59  
60

1  
2  
3  
4  
5  
6 168 workers and blue collar workers, compared with professionals. We also calculated the  
7  
8 169 ORs between each SEP and SROH (Table2), and the ORs between work-related factors  
9  
10 170 and SROH (Table3). Additionally, we estimated the multivariate ORs for the association  
11  
12 171 between occupations and SROH, adjusting for work-related factors, such as job stress  
13  
14 172 social support in workplace, working hours, and type of employment (Table4). With  
15  
16 173 regard to missing data on explanatory variables, we carried out 2 separate analyses. In  
17  
18 174 the first analysis, dummy variables were used for missing data, with creation of a  
19  
20 175 categorical indicator for missing responses (missing category) (Appendix Table1). In the  
21  
22 176 second analysis, we conducted multiple imputations for the missing data, included all  
23  
24 177 variables shown in Table1. Interactions between sex and the other variables  
25  
26 178 (age/marital status/job stress/social support in the workplace/working hour/type of  
27  
28 179 employment) were tested by entering multiplicative interaction terms into the  
29  
30 180 multivariate adjusted model, because employment situation in Japan is highly different  
31  
32 181 in men and women. SAS 9.3 (SAS Institute, Cary, NC) was used for all statistical  
33  
34 182 analyses, and “Proc MI” and “Proc MIANALYZE” were used for the multiple  
35  
36 183 imputations  
37  
38  
39  
40  
41

## 42 185 Ethics

43  
44 186 The study was approved by the ethics committee of the Graduate School of  
45  
46 187 Medicine and Faculty of Medicine, The University of Tokyo.  
47

48 188

## 49 189 Results

50  
51  
52 190 The distribution of answers for the SROH was as follows; 1.excellent (N of 407),  
53  
54 191 2.good (N of 772), 3.fair (N of 1155), 4.not so good (N of 738) and 5.poor (N of 129). Table  
55  
56 192 1 describes the basic characteristics of the study participants according to level of SROH.  
57  
58  
59  
60

1  
2  
3  
4  
5  
6 193 All of the characteristics except marital status were significantly associated with SROH.  
7  
8 194 Poor SROH was more prevalent in men, older age-groups, blue collar workers,  
9  
10 195 precarious workers, as well as those with lower income, lower wealth, lower educational  
11  
12 196 attainment, higher childhood poverty, lower social support, higher stress and longer  
13  
14 197 working hours.

15  
16 198 Table 2 shows the sex- and age- adjusted odds ratios and 95% CI for the  
17  
18 199 associations between various indicators of SEP (occupation, income, wealth, education,  
19  
20 200 and two indicators of childhood SEP) and poor SROH. All indicators of SEP were  
21  
22 201 inversely associated with SROH. The association with SROH was significant only for  
23  
24 202 the lowest levels in occupation, income and childhood SEP, while the association was  
25  
26 203 comparatively larger in magnitude and significant for the intermediate levels as well as  
27  
28 204 for the lowest levels in education and wealth. Blue collar workers had significantly  
29  
30 205 higher OR of poor SROH (1.44, 95% CI: 1.07-1.95). Educational attainment, current  
31  
32 206 income, wealth and SEP during childhood were also associated with poor SROH.

33  
34  
35 207 Table 3 describes crude ORs and 95% CI for associations between  
36  
37 208 workplace-related factors (job stress, social support in workplace, working hour and  
38  
39 209 type of employment) and poor SROH. All of the factors were associated with poor SROH.  
40  
41 210 Workers with the most stress as well as low social support had higher odds of poor  
42  
43 211 SROH compared with those with less job stress or more social support. Those who  
44  
45 212 reported working more than 60 hours per week had poorer SROH than those who  
46  
47 213 worked 40-50 hours per week (OR: 1.69, 95%CI 1.20-2.39). Precarious workers had  
48  
49 214 higher OR for poor oral health (1.32, 95% CI: 1.11-1.57), compared with permanent  
50  
51 215 workers.

52  
53  
54 216 Table 4 shows the multivariate ORs and 95% CI for poor SROH from the  
55  
56 217 multiple imputation models. The associations between occupational class and poor  
57  
58  
59  
60

1  
2  
3  
4  
5  
6 218 SROH were substantially attenuated by work-related factors. Approximately 60% of the  
7  
8 219 association between occupations and poor SROH was explained by the work-related  
9  
10 220 factors.<sup>28</sup> In the multivariate model, all of the workplace-related factors (social support,  
11  
12 221 job stress, type of employment and working hours) were significantly associated with  
13  
14 222 poor SROH. Compared with the analysis that employed dummy categories for missing  
15  
16 223 values (Appendix Table1), we found similar results after accounting for missing values  
17  
18 224 using multiple imputations. None of the interactions were significant; occupation  
19  
20 225 (p=0.19), age (p=0.74), marital status (p=0.44), job stress (p=0.25), job support (p=0.50),  
21  
22 226 working hours (p=0.83), and type and employment (p=0.73).  
23  
24  
25  
26

## 27 228 **Discussion**

29 229 In the present study, we found oral health disparity across various indicators of  
30  
31 230 SEP as well as childhood SEP among workers in Japan. Moreover, the association  
32  
33 231 between occupations and SROH was substantially explained by job-related factors. Our  
34  
35 232 finding is notable for demonstrating oral health disparities even in Japan, where the  
36  
37 233 citizens, including children, have access to dental services with relatively low  
38  
39 234 out-of-pocket cost. Our findings are consistent with a previous study by Morita et al.,  
40  
41 235 which reported that there were significant oral health disparities across occupations.<sup>16</sup>  
42  
43 236 We found oral health disparities across occupations as well as other indicators of SEP,  
44  
45 237 including income, wealth, and childhood SEP. Tsakos, et al. reported social gradients  
46  
47 238 across occupation, income, wealth and parental occupation, among older individuals in  
48  
49 239 England.<sup>17</sup>  
50  
51

52 240 One reason why people with higher SEP had better SROH may be related to  
53  
54 241 preventive practices – e.g. dental flossing or use of interdental brush (interproximal  
55  
56 242 brush). Neamatol et al. reported that students with doctorate or masters degrees flossed  
57  
58  
59  
60



1  
2  
3  
4  
5  
6 243 more than those with bachelor degree or less<sup>29</sup>, while Tseveenjav et al. reported that  
7  
8 244 people with higher educational attainment performed cleaning more than the others.<sup>30</sup>  
9  
10 245 Another reason people in higher SEP had better SROH might be utilization of  
11  
12 246 preventive dentistry. People with lower incomes tend to use preventive dental service  
13  
14 247 less frequently<sup>31 32</sup>, and the difference of use in preventive service might explain the  
15  
16 248 social gradient of SROH. In fact, in the present study, approximately one in three  
17  
18 249 participants (32.3%) among the richest group made a preventive dental clinic visit in  
19  
20 250 the past year, whereas only one in four participants (24.7%) among the poorest group  
21  
22 251 did so. On the other hand, we did not observe a big difference among rich and poor  
23  
24 252 participants in the use of dental services for treatment; 42.3% for the richest group  
25  
26 253 versus 41.4% for the poorest group. Thus, the pathway from lower household income to  
27  
28 254 poor SROH might be through preventive dental service utilization.

29  
30  
31 255 Another explanation for the relationship between SEP and SROH might be  
32  
33 256 through psychosocial factors. Baker et al reported that greater sense of coherence and  
34  
35 257 higher self-esteem were linked to better oral health perceptions.<sup>33</sup> Therefore, these  
36  
37 258 factors might be mediators between SEP and SROH because those who are in higher  
38  
39 259 SEP, including occupations, have, in general, higher self-esteem and sense of coherence.

40  
41 260 Our findings add to the previous literature by suggesting that occupational  
42  
43 261 inequalities in oral health can be substantially explained by work-based factors, such as,  
44  
45 262 social support in the workplace, job stress, working hours, and type of employment  
46  
47 263 (precarious vs. permanent). These workplace-related factors might be targets for  
48  
49 264 interventions to mitigate oral health disparities, i.e. in addition to intervening to  
50  
51 265 improve socioeconomic conditions, it may be possible focus on working conditions to  
52  
53 266 reduce oral health disparities.

54  
55  
56 267 Social support has been reported to have a “stress-buffering effect” on  
57  
58  
59  
60

1  
2  
3  
4  
5  
6 268 cardiovascular diseases.<sup>34-36</sup> Stress has been reported as one of the exacerbating factors  
7  
8 269 for periodontitis or gingivitis. Hugo FN et al. reported that stress was a significant risk  
9  
10 270 factor for gingivitis<sup>21</sup>, and Krejci CB, et al. suggested that stress may hasten the  
11  
12 271 development and progression of periodontitis through the suppression of T-cell activity  
13  
14 272 or a reduction in salivary IgA.<sup>19 20</sup> Precarious employment was also significantly  
15  
16 273 associated with poor SROH in the multivariate model. Previous studies on precarious  
17  
18 274 employment showed that this form of work is associated with job insecurity and  
19  
20 275 psychological distress<sup>37 38</sup>, and, therefore, being in a precarious employment might also  
21  
22 276 a risk factor of developing periodontitis or gingivitis via stress. The number of  
23  
24 277 precarious employees has been increasing all over the world as well as in Japan. In  
25  
26 278 Japan 35.2% of total workers in 2012 were precarious workers, while only 16.4% were in  
27  
28 279 1985.<sup>39</sup>

30  
31 280 Previous studies have suggested a consistent link between early life-course  
32  
33 281 socioeconomic circumstances and health status in adulthood.<sup>3 5 40 41</sup> Our study is  
34  
35 282 consistent with previous research in showing an association between childhood SEP and  
36  
37 283 oral health. Poulton R et al. examined 1,000 children in New Zealand and found that  
38  
39 284 there was a significant social gradient of dental health (tooth cleanliness, gingival  
40  
41 285 bleeding, periodontal disease, and tooth decay) across childhood SEP.<sup>3</sup> Thomson et al.  
42  
43 286 examined 789 individuals and revealed that those who were in low socioeconomic status  
44  
45 287 at age 5 years were more likely to have lost a tooth in adulthood because of caries and  
46  
47 288 had greater prevalence and extent of periodontitis.<sup>5</sup> In our study, when poverty during  
48  
49 289 the childhood at age five or fifteen was added to the multivariate model, both poverty  
50  
51 290 during childhood at age five and at age fifteen were associated with poorer SROH (OR:  
52  
53 291 1.60, 95%CI: 1.23-2.08 at age five, and OR: 1.47, 95%CI: 1.15-1.87 at age fifteen,  
54  
55 292 respectively, not shown in tables). These two factors seemed to be independently  
56  
57  
58  
59  
60

1  
2  
3  
4  
5  
6 293 associated with SROH, because coefficients of the other covariates in the multivariate  
7  
8 294 model hardly changed before and after adding the childhood poverty variables to the  
9  
10 295 multivariate model. Therefore, poverty during childhood appears to affect SROH in  
11  
12 296 adulthood separately from sex, age, and the current workplace-related factors.  
13

14 297

15  
16 298 · Limitations

17  
18 299 There are some limitations in this study. First, SROH is a subjective  
19  
20 300 measurement. Some might argue that this type of measurement might be invalid,  
21  
22 301 however, self-rated oral health has been examined and reported to be a well-validated  
23  
24 302 and reliable index.<sup>24 25</sup> Jones JA et al. validated the association between a single-item  
25  
26 303 self-report question and oral clinical examination among two hundred thirty-two  
27  
28 304 community-dwelling participants. The question was *“How would you describe the*  
29  
30 305 *health of your teeth and gums? Would you say it is excellent, very good, good, fair or*  
31  
32 306 *poor?”* They reported that the single-item self-reported question had a sensitivity of 0.75  
33  
34 307 and a specificity of 0.67 in identifying persons with severe need for denture care,  
35  
36 308 compared with the clinical examination.<sup>24</sup> The validation studies were conducted in  
37  
38 309 English, and the present study was conducted in Japanese. As far as we know, no  
39  
40 310 previous studies have validated the scale in Japanese yet. However, we have confirmed  
41  
42 311 that poor SROH was significantly associated with number of removed tooth in the  
43  
44 312 sample (Appendix Table2). Ando et al confirmed the validity of self-reported number of  
45  
46 313 remaining teeth and clinical examination in Japanese.<sup>42</sup> Therefore, this might support  
47  
48 314 that the scale in Japanese is also valid. Future studies are needed to clarify the validity  
49  
50 315 of the scale in Japanese. Secondly, the response rate was low. However, Takada et. al.  
51  
52 316 compared the collected sample with the vital statistics in Census 2010 of the target  
53  
54 317 population and reported that the obtained sample was properly equivalent with respect  
55  
56  
57  
58  
59  
60

1  
2  
3  
4  
5  
6 318 to age, sex, and education.<sup>23</sup> Therefore, it is likely that the selection bias does not matter  
7  
8 319 in terms of age, sex and education. We are not able to discuss selection bias precisely  
9  
10 320 because we do not have other information among non-responders, such as smoking  
11  
12 321 habit, income and so on. Thirdly, the data used in this study was cross-sectional, not  
13  
14 322 longitudinal, therefore, we cannot infer causality. Thus, low SEP could cause worse oral  
15  
16 323 health; but the reverse is also possible, i.e. it is well described that poor dental status  
17  
18 324 can lead to social stigma and adversely impact people's chances of employment and  
19  
20 325 success in life.<sup>43</sup> Attention should be given to the positive association between current  
21  
22 326 poor SROH and economic disadvantage in childhood, because the assessments of  
23  
24 327 economic disadvantage in childhood were based on the participants' recall (recall bias).  
25  
26  
27 328 Fourth, we did not gather data on brushing frequency or use of interdental brush/dental  
28  
29 329 flossing<sup>30</sup>, and we could not include these factors in the analysis. Some studies reported  
30  
31 330 that people with lower educational attainment or low income use interdental  
32  
33 331 brush/dental flossing less, and this might explain the association between SEPs and  
34  
35 332 poorer SROH. Finally, the 7 items for job stress and the 6 items for social support at  
36  
37 333 workplace were not validated. However, both have been used in practice in Japan, and  
38  
39 334 the internal consistency of the scale in the present participants was acceptably high:  
40  
41 335 Cronbach's alpha coefficient was 0.90 for the 7 items for job stress, and 0.91 for the 6  
42  
43 336 items for social support. Future studies should employ well-validated questions on job  
44  
45 337 stress and social support.  
46  
47  
48 338

### 339 **Conclusion**

340 We found oral health disparities across various SEPs, and that work-related  
341 factors could account for more than half the association between occupation and SROH .  
342 Improving workplace environments may present a viable solution to reduce oral health

1  
2  
3  
4  
5  
6 343 disparities. Future studies on the effect of workplace-related factors on oral health  
7  
8 344 should use longitudinal data to elucidate the causal association between the  
9  
10 345 workplace-related factors and oral health.  
11

12 346

13  
14 347

15  
16 348 **Acknowledgments**

17  
18 349 The authors thank Prof. Hideki Hashimoto, Prof. Norito Kawakami and their  
19  
20 350 team for providing us with data from the Japanese Study of Stratification, Health,  
21  
22 351 Income, and Neighborhood (J-SHINE). The authors also thank Dr. Akiomi Inoue and Dr.  
23  
24 352 Hiroshi Kanbayashi for his valuable advice.  
25

26  
27 353

28  
29 354

30  
31 355 **Contributors:** TT, JA, IK, KK, and KO made substantial contribution to the concept and  
32  
33 356 design of the study. TT drafted the manuscript and JA, IK, KK, and KO revised it  
34  
35 357 critically for important intellectual content. TT, JA, IK, KK, and KO approved the final  
36  
37 358 version of the manuscript.  
38

39  
40 359

41 360 **Competing interest:** None declared.  
42

43  
44 361

45  
46 362 **Funding:** This work was supported by a Grant-in-Aid for Scientific Research on  
47  
48 363 Innovative Areas 2009-2013 (No. 21119002, No. 21119001 and 21119007) from the  
49  
50 364 Ministry of Education, Culture, Sports, Science and Technology, Japan. T Tsuboya is  
51  
52 365 supported by Grant-in-Aid for Epidemiological Research (St. Luke's Life Science  
53  
54 366 Institute). These sponsors were not involved in study design and the collection, analysis,  
55  
56 367 and interpretation of data and the writing of the article and the decision to submit it for  
57  
58

1  
2  
3  
4  
5  
6  
7  
8  
9  
10  
11  
12  
13  
14  
15  
16  
17  
18  
19  
20  
21  
22  
23  
24  
25  
26  
27  
28  
29  
30  
31  
32  
33  
34  
35  
36  
37  
38  
39  
40  
41  
42  
43  
44  
45  
46  
47  
48  
49  
50  
51  
52  
53  
54  
55  
56  
57  
58  
59  
60

368 publication.

369

370 **Data sharing:** No additional data are available.

371

372

373

374

375

376

377

378

379

380

381

382

383

384

385

386

387

388

389

390

391

392

For peer review only

393

394 **REFERENCES**

- 395 1. Murray CJ, Vos T, Lozano R, et al. Disability-adjusted life years (DALYs) for 291 diseases  
396 and injuries in 21 regions, 1990-2010: a systematic analysis for the Global Burden of  
397 Disease Study 2010. *Lancet* 2012;**380**(9859):2197-223.
- 398 2. Marcenes W, Kassebaum NJ, Bernabe E, et al. Global burden of oral conditions in  
399 1990-2010: a systematic analysis. *Journal of dental research* 2013;**92**(7):592-7.
- 400 3. Poulton R, Caspi A, Milne BJ, et al. Association between children's experience of  
401 socioeconomic disadvantage and adult health: a life-course study. *Lancet*  
402 2002;**360**(9346):1640-5.
- 403 4. Sabbah W, Watt RG, Sheiham A, et al. Effects of allostatic load on the social gradient in  
404 ischaemic heart disease and periodontal disease: evidence from the Third National  
405 Health and Nutrition Examination Survey. *Journal of epidemiology and community*  
406 *health* 2008;**62**(5):415-20.
- 407 5. Thomson WM, Poulton R, Milne BJ, et al. Socioeconomic inequalities in oral health in  
408 childhood and adulthood in a birth cohort. *Community dentistry and oral*  
409 *epidemiology* 2004;**32**(5):345-53.
- 410 6. Sabbah W, Tsakos G, Sheiham A, et al. The role of health-related behaviors in the  
411 socioeconomic disparities in oral health. *Social science & medicine*  
412 2009;**68**(2):298-303.
- 413 7. Aida J, Kondo K, Yamamoto T, et al. Oral health and cancer, cardiovascular, and  
414 respiratory mortality of Japanese. *Journal of dental research* 2011;**90**(9):1129-35.
- 415 8. Polzer I, Schwahn C, Volzke H, et al. The association of tooth loss with all-cause and  
416 circulatory mortality. Is there a benefit of replaced teeth? A systematic review and  
417 meta-analysis. *Clinical oral investigations* 2012;**16**(2):333-51.

- 1  
2  
3  
4  
5  
6 418 9. Kawachi I, Berkman L. *Social Epidemiology*. 1st edition: Oxford University Press, USA,  
7  
8 419 2000.  
9  
10 420 10. Drury TF, Garcia I, Adesanya M. Socioeconomic disparities in adult oral health in the  
11  
12 421 United States. *Annals of the New York Academy of Sciences* 1999;**896**:322-4.  
13  
14 422 11. Astrom AN, Haugejorden O, Skaret E, et al. Oral Impacts on Daily Performance in  
15  
16 423 Norwegian adults: the influence of age, number of missing teeth, and  
17  
18 424 socio-demographic factors. *European journal of oral sciences* 2006;**114**(2):115-21.  
19  
20 425 12. Lopez R, Fernandez O, Baelum V. Social gradients in periodontal diseases among  
21  
22 426 adolescents. *Community dentistry and oral epidemiology* 2006;**34**(3):184-96.  
23  
24 427 13. Sabbah W, Tsakos G, Chandola T, et al. Social gradients in oral and general health.  
25  
26 428 *Journal of dental research* 2007;**86**(10):992-6.  
27  
28 429 14. Tsakos G, Sheiham A, Iliffe S, et al. The impact of educational level on oral  
29  
30 430 health-related quality of life in older people in London. *European journal of oral*  
31  
32 431 *sciences* 2009;**117**(3):286-92.  
33  
34 432 15. Morita I, Nakagaki H, Yoshii S, et al. Gradients in periodontal status in Japanese  
35  
36 433 employed males. *Journal of clinical periodontology* 2007;**34**(11):952-6.  
37  
38 434 16. Morita I, Nakagaki H, Yoshii S, et al. Is there a gradient by job classification in dental  
39  
40 435 status in Japanese men? *European journal of oral sciences* 2007;**115**(4):275-9.  
41  
42 436 17. Tsakos G, Demakakos P, Breeze E, et al. Social gradients in oral health in older adults:  
43  
44 437 findings from the English longitudinal survey of aging. *American journal of public*  
45  
46 438 *health* 2011;**101**(10):1892-9.  
47  
48 439 18. Sanders AE, Spencer AJ. Social inequality in perceived oral health among adults in  
49  
50 440 Australia. *Australian and New Zealand journal of public health* 2004;**28**(2):159-66.  
51  
52 441 19. Seymour GJ. Importance of the host response in the periodontium. *Journal of clinical*  
53  
54 442 *periodontology* 1991;**18**(6):421-6.  
55  
56  
57  
58  
59  
60



- 1  
2  
3  
4  
5  
6 443 20. Krejci CB, Bissada NF. Periodontitis--the risks for its development. *General dentistry*  
7  
8 444 2000;**48**(4):430-6; quiz 37-8.
- 9  
10 445 21. Hugo FN, Hilgert JB, Bozzetti MC, et al. Chronic stress, depression, and cortisol levels  
11  
12 446 as risk indicators of elevated plaque and gingivitis levels in individuals aged 50  
13  
14 447 years and older. *Journal of periodontology* 2006;**77**(6):1008-14.
- 15  
16 448 22. Doyle CJ, Bartold PM. How does stress influence periodontitis? *Journal of the*  
17  
18 449 *International Academy of Periodontology* 2012;**14**(2):42-9.
- 19  
20 450 23. Takada M, Kondo N, Hashimoto H. Japanese study on stratification, health, income, and  
21  
22 451 neighborhood: study protocol and profiles of participants. *Journal of epidemiology /*  
23  
24 452 *Japan Epidemiological Association* 2014;**24**(4):334-44.
- 25  
26 453 24. Jones JA, Spiro A, 3rd, Miller DR, et al. Need for dental care in older veterans:  
27  
28 454 assessment of patient-based measures. *Journal of the American Geriatrics Society*  
29  
30 455 2002;**50**(1):163-8.
- 31  
32 456 25. Jones JA, Kressin NR, Miller DR, et al. Comparison of patient-based oral health outcome  
33  
34 457 measures. *Quality of life research : an international journal of quality of life aspects*  
35  
36 458 of treatment, care and rehabilitation 2004;**13**(5):975-85.
- 37  
38 459 26. Grusky DB, Sato Y, Jan O, et al. Social Mobility in Japan: A New Approach to Modeling  
39  
40 460 Trend in Mobility. 2008.  
41  
42 461 [http://www.stanford.edu/group/scspi/grusky/article\\_files/social\\_mobility\\_japan.pdf](http://www.stanford.edu/group/scspi/grusky/article_files/social_mobility_japan.pdf).  
43  
44 462 Accessed Apr. 15<sup>th</sup> 2014.
- 45  
46 463 27. Inoue A, Kawakami N, Shimomitsu T, et al. Development of a short questionnaire to  
47  
48 464 measure an extended set of job demands, job resources, and positive health  
49  
50 465 outcomes: the new brief job stress questionnaire. *Industrial health*  
51  
52 466 2014;**52**(3):175-89.
- 53  
54 467 28. Kato S, Doi Y, Tsutsui S, et al. [Job stress among Japan Overseas Cooperation  
55  
56  
57  
58  
59  
60

- 1  
2  
3  
4  
5  
6 468 volunteers--using the Brief Job Stress Questionnaire]. *Sangyo eiseigaku zasshi =*  
7  
8 469 *Journal of occupational health* 2004;**46**(6):191-200.  
9  
10 470 29. Neamatollahi H, Ebrahimi M. Oral health behavior and its determinants in a group of  
11  
12 471 Iranian students. *Indian journal of dental research : official publication of Indian*  
13  
14 472 *Society for Dental Research* 2010;**21**(1):84-8.  
15  
16 473 30. Tseveenjav B, Suominen-Taipale L, Varsio S, et al. Patterns of oral cleaning habits and  
17  
18 474 use of fluoride among dentate adults in Finland. *Oral health & preventive dentistry*  
19  
20 475 2010;**8**(3):287-94.  
21  
22 476 31. Pizarro V, Ferrer M, Domingo-Salvany A, et al. The utilization of dental care services  
23  
24 477 according to health insurance coverage in Catalonia (Spain). *Community dentistry*  
25  
26 478 *and oral epidemiology* 2009;**37**(1):78-84.  
27  
28  
29 479 32. Chi DL, Rossitch KC, Beeles EM. Developmental delays and dental caries in low-income  
30  
31 480 preschoolers in the USA: a pilot cross-sectional study and preliminary explanatory  
32  
33 481 model. *BMC oral health* 2013;**13**:53.  
34  
35 482 33. Baker SR, Mat A, Robinson PG. What psychosocial factors influence adolescents' oral  
36  
37 483 health? *Journal of dental research* 2010;**89**(11):1230-5.  
38  
39 484 34. Gerin W, Milner D, Chawla S, et al. Social support as a moderator of cardiovascular  
40  
41 485 reactivity in women: a test of the direct effects and buffering hypotheses.  
42  
43 486 *Psychosomatic medicine* 1995;**57**(1):16-22.  
44  
45 487 35. Uchino BN, Cacioppo JT, Kiecolt-Glaser JK. The relationship between social support and  
46  
47 488 physiological processes: a review with emphasis on underlying mechanisms and  
48  
49 489 implications for health. *Psychological bulletin* 1996;**119**(3):488-531.  
50  
51 490 36. Uchino BN. Social support and health: a review of physiological processes potentially  
52  
53 491 underlying links to disease outcomes. *Journal of behavioral medicine*  
54  
55 492 2006;**29**(4):377-87.  
56  
57  
58  
59  
60

- 1  
2  
3  
4  
5  
6 493 37. Tsurugano S, Inoue M, Yano E. Precarious employment and health: analysis of the  
7  
8 494 Comprehensive National Survey in Japan. *Industrial health* 2012;**50**(3):223-35.  
9  
10 495 38. Vives A, Amable M, Ferrer M, et al. Employment precariousness and poor mental health:  
11  
12 496 evidence from Spain on a new social determinant of health. *Journal of*  
13  
14 497 *environmental and public health* 2013;**2013**:978656.  
15  
16 498 39. Ministry of Health, Labour and Welfare. Current situation on precarious workers (in  
17  
18 499 Japanese).  
19  
20 500 [http://www.mhlw.go.jp/seisakunitsuite/bunya/koyou\\_roudou/part\\_haken/genjou/](http://www.mhlw.go.jp/seisakunitsuite/bunya/koyou_roudou/part_haken/genjou/)  
21  
22 501 Accessed Apr. 15<sup>th</sup> 2014.  
23  
24 502 40. Lynch JW, Kaplan GA, Cohen RD, et al. Childhood and adult socioeconomic status as  
25  
26 503 predictors of mortality in Finland. *Lancet* 1994;**343**(8896):524-7.  
27  
28 504 41. Black RE, Victora CG, Walker SP, et al. Maternal and child undernutrition and  
29  
30 505 overweight in low-income and middle-income countries. *Lancet*  
31  
32 506 2013;**382**(9890):427-51.  
33  
34 507 42. Ando Y, Ikeda S, and Yoshihara A. The reliability of self-assessment of number of  
35  
36 508 remaining teeth using questionnaires. *Journal of Dental Health* 1997(47):657-62.  
37  
38 509 43. Horton S, Barker JC. Stigmatized biologies: Examining the cumulative effects of oral  
39  
40 510 health disparities for Mexican American farmworker children. *Medical anthropology*  
41  
42 511 *quarterly* 2010;**24**(2):199-219.  
43  
44 512  
45  
46 513  
47  
48 514  
49  
50 515  
51  
52  
53  
54  
55  
56  
57  
58  
59  
60

Table 1. Characteristics of participants by status of self-rated oral health (SROH) among 3,201 men and women aged 25-50 years old in Japan during 2010-2011

| Characteristic                                                     | Poor SROH <sup>a</sup> |        | <i>p-value</i> <sup>b</sup> |
|--------------------------------------------------------------------|------------------------|--------|-----------------------------|
|                                                                    | n                      | (%)    |                             |
| Sex                                                                |                        |        |                             |
| Men                                                                | 529                    | (29.7) | 0.0002                      |
| Women                                                              | 334                    | (23.8) |                             |
| Age                                                                |                        |        |                             |
| 25-29                                                              | 132                    | (22.5) | 0.0001                      |
| 30-34                                                              | 138                    | (25.0) |                             |
| 35-39                                                              | 173                    | (27.2) |                             |
| 40-44                                                              | 175                    | (25.8) |                             |
| 45-50                                                              | 225                    | (33.8) |                             |
| Marital status                                                     |                        |        |                             |
| Married                                                            | 597                    | (27.9) | 0.14                        |
| Not married <sup>c</sup>                                           | 269                    | (25.5) |                             |
| Occupations                                                        |                        |        |                             |
| Specialists                                                        | 83                     | (28.0) | 0.0009                      |
| White collar workers                                               | 497                    | (24.9) |                             |
| Blue collar workers                                                | 287                    | (31.5) |                             |
| Annual household income                                            |                        |        |                             |
| Less than 5 million JPY (Approximately GBP 29,400) <sup>d</sup>    | 226                    | (32.3) | 0.0012                      |
| 5-7.5 million JPY (Approximately GBP 29,400-44,100) <sup>d</sup>   | 179                    | (26.6) |                             |
| More than 7.5 mil JPY (Approximately GBP 44,100) <sup>d</sup>      | 250                    | (24.3) |                             |
| Wealth (Household financial and other assets)                      |                        |        |                             |
| Less than 3 million JPY (Approximately GBP 17,600) <sup>d</sup>    | 201                    | (34.7) | <.0001                      |
| 3-5 million JPY (Approximately GBP 17,600-29,400) <sup>d</sup>     | 169                    | (30.2) |                             |
| More than 5 million JPY (Approximately GBP 29,400) <sup>d</sup>    | 173                    | (22.9) |                             |
| Education                                                          |                        |        |                             |
| High school or less                                                | 263                    | (36.3) | <.0001                      |
| Vocational/junior college                                          | 262                    | (26.9) |                             |
| University or more                                                 | 333                    | (22.7) |                             |
| Economic situation at home when respondents were five years old    |                        |        |                             |
| Poor, very poor                                                    | 226                    | (34.8) | <.0001                      |
| Normal                                                             | 502                    | (25.7) |                             |
| Well-off, very well-off                                            | 133                    | (23.5) |                             |
| Economic situation at home when respondents were fifteen years old |                        |        |                             |
| Poor, very poor                                                    | 216                    | (35.9) | <.0001                      |
| Normal                                                             | 467                    | (24.8) |                             |
| Well-off, very well-off                                            | 180                    | (25.9) |                             |

|    |                               |     |        |        |
|----|-------------------------------|-----|--------|--------|
| 1  | Job stress                    |     |        |        |
| 2  | 1st tertile(least stressful)  | 289 | (25.2) |        |
| 3  | 2nd tertile                   | 272 | (25.2) | 0.0017 |
| 4  | 3rd tertile(most stressful)   | 300 | (31.3) |        |
| 5  | Social support in workplace   |     |        |        |
| 6  | 1st tertile(most supportive)  | 266 | (23.4) |        |
| 7  | 2nd tertile                   | 278 | (29.1) | 0.0014 |
| 8  | 3rd tertile(least supportive) | 295 | (29.8) |        |
| 9  | Working hours per week        |     |        |        |
| 10 | <40                           | 360 | (26.7) |        |
| 11 | 40-50                         | 162 | (23.5) |        |
| 12 | 50-60                         | 81  | (26.3) | 0.027  |
| 13 | >60                           | 67  | (34.2) |        |
| 14 | Type of employment            |     |        |        |
| 15 | Permanent                     | 526 | (25.3) |        |
| 16 | Precarious                    | 272 | (30.9) | 0.0083 |
| 17 | Self-employed                 | 66  | (27.3) |        |

<sup>a</sup> The status of SROH was determined by the question: "Overall, how would you rate the health of your teeth and gums?". "Poor SROH" includes respondents of "not so good" and "poor", and "Good SROH" includes respondents of "excellent", "good" and "fair"

<sup>b</sup> P-value was calculated by chi-squared test.

<sup>c</sup> Divorced/separated and widow people were classified into "not married".

<sup>d</sup> Income and wealth were converted at 170 JPY (Japanese Yen) to 1 GBP (Great Britain Pound).

Table 2. Age- and sex- adjusted odds ratios and 95% confidence intervals for associations between socioeconomic positions and poor self-rated oral health among 3,201 men and women aged 25-50 years old in Japan during 2010-2011.

| Independent variable                                                      | odds ratio | 95% confidence interval | <i>p</i> -value |
|---------------------------------------------------------------------------|------------|-------------------------|-----------------|
| <b>Occupations</b>                                                        |            |                         |                 |
| Professionals                                                             | 1.00       |                         |                 |
| Office workers                                                            | 1.05       | ( 0.79 - 1.39 )         | 0.75            |
| Blue collar workers                                                       | 1.44       | ( 1.07 - 1.95 )         | 0.017           |
| <b>Household income</b>                                                   |            |                         |                 |
| Lowest tertile                                                            | 1.72       | ( 1.38 - 2.16 )         | <.0001          |
| Second tertile                                                            | 1.18       | ( 0.94 - 1.48 )         | 0.15            |
| Highest tertile (richest)                                                 | 1.00       |                         |                 |
| <b>Wealth (Household financial and other assets)</b>                      |            |                         |                 |
| Lowest tertile                                                            | 1.93       | ( 1.51 - 2.46 )         | <.0001          |
| Second tertile                                                            | 1.55       | ( 1.20 - 1.99 )         | 0.0007          |
| Highest tertile (richest)                                                 | 1.00       |                         |                 |
| <b>Educational attainment</b>                                             |            |                         |                 |
| High school or less                                                       | 1.98       | ( 1.63 - 2.42 )         | <.0001          |
| Vocational/junior college                                                 | 1.38       | ( 1.14 - 1.68 )         | 0.0012          |
| University or more                                                        | 1.00       |                         |                 |
| <b>Economic situation at home when respondents were five years old</b>    |            |                         |                 |
| Poor, very poor                                                           | 1.61       | ( 1.25 - 2.08 )         | 0.0003          |
| Normal                                                                    | 1.07       | ( 0.86 - 1.34 )         | 0.55            |
| Well-off, very well-off                                                   | 1.00       |                         |                 |
| <b>Economic situation at home when respondents were fifteen years old</b> |            |                         |                 |
| Poor, very poor                                                           | 1.53       | ( 1.20 - 1.95 )         | 0.0006          |
| Normal                                                                    | 0.91       | ( 0.74 - 1.11 )         | 0.33            |
| Well-off, very well-off                                                   | 1.00       |                         |                 |

SROH was assessed by the following question. "Overall, how would you rate the health of your teeth and gums?" Potential responses ranged from "1.excellent, 2.good, 3.fair, 4.not so good or 5.poor". In the analysis, the outcome was dichotomized: "1.excellent and 2.good, 3.fair" as "Good SROH", and "4.not so good and 5.poor" as "Poor SROH".

Table 3. Crude odds ratios and 95% confidence intervals for associations between workplace-related factors and poor self-rated oral health among 3,201 men and women aged 25-50 years old in Japan during 2010-2011.

| Independent variable          | odds ratio | 95% confidence interval | <i>p</i> -value |
|-------------------------------|------------|-------------------------|-----------------|
| Job stress                    |            |                         |                 |
| 1st tertile(least stressful)  | 1.00       |                         |                 |
| 2nd tertile                   | 1.00       | ( 0.83 - 1.21 )         | 0.99            |
| 3rd tertile(most stressful)   | 1.36       | ( 1.12 - 1.64 )         | 0.0018          |
| Social support in workplace   |            |                         |                 |
| 1st tertile(most supportive)  | 1.00       |                         |                 |
| 2nd tertile                   | 1.34       | ( 1.10 - 1.63 )         | 0.0033          |
| 3rd tertile(least supportive) | 1.39       | ( 1.14 - 1.68 )         | 0.001           |
| Working hours per week        |            |                         |                 |
| <40                           | 1.19       | ( 0.96 - 1.47 )         | 0.12            |
| 40-50                         | 1.00       |                         |                 |
| 50-60                         | 1.16       | ( 0.85 - 1.58 )         | 0.34            |
| >60                           | 1.69       | ( 1.20 - 2.39 )         | 0.0027          |
| Type of employment            |            |                         |                 |
| Permanent                     | 1.00       |                         |                 |
| Precarious                    | 1.32       | ( 1.11 - 1.57 )         | 0.002           |
| Self-employed                 | 1.10       | ( 0.82 - 1.49 )         | 0.52            |

SROH was assessed by the following question. "Overall, how would you rate the health of your teeth and gums?" Potential responses ranged from "1.excellent, 2.good, 3.fair, 4.not so good or 5.poor". In the analysis, the outcome was dichotomized:"1.excellent and 2.good, 3.fair" as "Good SROH", and "4.not so good and 5.poor" as "Poor SROH".

Table 4. Multivariate odds ratios and 95% confidence intervals from multiple imputation analysis for associations with poor self-rated oral health among 3,201 men and women aged 25-50 years old in Japan during 2010-2011

| Independent variable               | odds ratio | 95% confidence interval | <i>p</i> -value |
|------------------------------------|------------|-------------------------|-----------------|
| <b>Occupations</b>                 |            |                         |                 |
| Professionals                      | 1.00       |                         |                 |
| Office workers                     | 0.97       | ( 0.73 - 1.29 )         | 0.82            |
| Blue collar workers                | 1.18       | ( 0.86 - 1.61 )         | 0.29            |
| <b>Sex</b>                         |            |                         |                 |
| Men                                | 1.61       | ( 1.33 - 1.96 )         | <.0001          |
| Women                              | 1.00       |                         |                 |
| <b>Age</b>                         |            |                         |                 |
| 25-29                              | 0.88       | ( 0.66 - 1.16 )         | 0.36            |
| 30-34                              | 1.00       |                         |                 |
| 35-39                              | 1.10       | ( 0.85 - 1.44 )         | 0.45            |
| 40-44                              | 0.99       | ( 0.76 - 1.30 )         | 0.96            |
| 45-50                              | 1.49       | ( 1.14 - 1.93 )         | 0.0033          |
| <b>Marital status</b>              |            |                         |                 |
| Married                            | 1.00       |                         |                 |
| Not married <sup>b</sup>           | 1.01       | ( 0.84 - 1.22 )         | 0.89            |
| <b>Job stress</b>                  |            |                         |                 |
| 1st tertile(least stressful)       | 1.00       |                         |                 |
| 2nd tertile                        | 0.96       | ( 0.79 - 1.17 )         | 0.71            |
| 3rd tertile(most stressful)        | 1.26       | ( 1.03 - 1.54 )         | 0.025           |
| <b>Social support in workplace</b> |            |                         |                 |
| 1st tertile(most supportive)       | 1.00       |                         |                 |
| 2nd tertile                        | 1.25       | ( 1.02 - 1.52 )         | 0.029           |
| 3rd tertile(least supportive)      | 1.23       | ( 1.01 - 1.5 )          | 0.042           |
| <b>Working hours per week</b>      |            |                         |                 |
| <40                                | 1.12       | ( 0.88 - 1.43 )         | 0.35            |
| 40-50                              | 1.00       |                         |                 |
| 50-60                              | 1.06       | ( 0.72 - 1.57 )         | 0.75            |
| >60                                | 1.41       | ( 0.99 - 2.01 )         | 0.06            |
| <b>Type of employment</b>          |            |                         |                 |
| Permanent                          | 1.00       |                         |                 |
| Precarious                         | 1.57       | ( 1.26 - 1.96 )         | <.0001          |
| Self-employed                      | 1.12       | ( 0.82 - 1.53 )         | 0.49            |



1  
2  
3  
4  
5 a. SROH was assessed by the following question. “Overall, how would you rate the health of your  
6 teeth and gums?” Potential responses ranged from “1.excellent, 2.good, 3.fair, 4.not so good or  
7 5.poor”. In the analysis, the outcome was dichotomized:”1.excellent and 2.good, 3.fair” as “Good  
8 SROH”, and “4.not so good and 5.poor” as “Poor SROH”.  
9

10  
11  
12 b. Divorced/separated and widow people were classified into “not married”.  
13  
14  
15  
16  
17  
18  
19  
20  
21  
22  
23  
24  
25  
26  
27  
28  
29  
30  
31  
32  
33  
34  
35  
36  
37  
38  
39  
40  
41  
42  
43  
44  
45  
46  
47  
48  
49  
50  
51  
52  
53  
54  
55  
56  
57  
58  
59  
60

For peer review only

1  
2  
3  
4  
5  
6  
7  
8  
9  
10  
11  
12  
13  
14  
15  
16  
17  
18  
19  
20  
21  
22  
23  
24  
25  
26  
27  
28  
29  
30  
31  
32  
33  
34  
35  
36  
37  
38  
39  
40  
41  
42  
43  
44  
45  
46  
47  
48  
49  
50  
51  
52  
53  
54  
55  
56  
57  
58  
59  
60

For peer review only

**Title:**

Oral health disparities across socioeconomic position: the influence of economic difficulties in childhood and current work-related factors, from J-SHINE study

**Corresponding author:**

Full name: Toru Tsuboya

Postal address: 75 Saint Alphonsus Street Apt. #311, Boston, MA, 02120

Email: tsubo828@gmail.com

Tel: +1-617-283-9677

**Authors:** Toru Tsuboya<sup>1,2</sup>, Jun Aida<sup>2</sup>, Ichiro Kawachi<sup>1</sup>, Kazuo Katase<sup>3</sup>, Ken Osaka<sup>2</sup>

1: Harvard School of Public Health, Department of Social and Behavioral Sciences, Boston, USA

2: Tohoku University Graduate School of Dentistry, Department of International and Community Oral Health, Sendai, Japan

3: Tohoku Gakuin University, Department Human Science, Sendai, Japan

## Abstract

**Objectives:** We investigated the association between socioeconomic position (SEP) and oral health, and examined the associations of economic difficulties in childhood and workplace-related factors on the association.

**Design:** Cross-sectional study

**Participants:** A total of 3,201 workers aged 25-50 years old, living in and around Tokyo, Japan

**Outcome measures:** Self-rated oral health (SROH). A logistic regression model was used to estimate odds ratios (ORs) for the association between poor SROH and each indicator of SEP (annual household income, wealth, educational attainment, occupation, and economic situation in childhood). Multiple imputation was used to address missing values.

**Results:** Each indicator of SEP, including childhood SEP, was significantly inversely associated with SROH, and all of the workplace-related factors (social support in the workplace, job stress, working hours, and type of employment) were also significantly associated with SROH. Compared with professionals, blue collar workers had significantly higher OR of poor SROH, and, the association was substantially explained by the workplace-related factors; ORs ranged from 1.44 in the age- and sex- adjusted model to 1.18 in the multivariate model. Poverty during childhood at age five and at age fifteen were associated with poorer SROH, and these two factors seemed to be independently associated with SROH

**Conclusions:** We found oral health disparity across SEP among workers in Japan.

Approximately 60% of the association between occupation and SROH was explained by job-related factors. Economic difficulties during childhood appear to affect SROH in adulthood separately from sex, age, and the current workplace-related factors.

1  
2  
3  
4  
5  
6  
7  
8  
9  
10  
11  
12  
13  
14  
15  
16  
17  
18  
19  
20  
21  
22  
23  
24  
25  
26  
27  
28  
29  
30  
31  
32  
33  
34  
35  
36  
37  
38  
39  
40  
41  
42  
43  
44  
45  
46  
47  
48  
49  
50  
51  
52  
53  
54  
55  
56  
57  
58  
59  
60

26 **Strengths and limitations of this study**

27 · Previous studies have shown an association between socioeconomic positions  
28 (SEP) in adulthood and oral health, however few have examined the relation between  
29 SEP in childhood and oral health in adulthood.

30 · Using cross-sectional data of 3,201 workers aged 25-50 years old in Japan, we  
31 found evidence that economic difficulties during childhood as well as SEP in adulthood  
32 independently appeared to affect self-rated oral health (SROH) in adulthood among  
33 working men and women.

34 · Workplace-related factors (social support in the workplace, job stress, working  
35 hours, and type of employment) substantially explained the association between  
36 occupation and SROH.

37 · The response rate was low, however, the obtained sample was properly  
38 equivalent with respect to age, sex, and education, compared with vital statistics in  
39 Census 2010 of the target population.

## 43 Background

44 Oral health problems, such as dental caries, periodontal disease, and  
45 edentulism, afflict more than half of the population of the planet (3.9 billion people) and  
46 untreated dental caries is the most prevalent condition (35% across all ages) among the  
47 291 conditions listed in the Global Burden of Disease 2010.<sup>1,2</sup> Using disability-adjusted  
48 life years (DALYs), which is an index of measuring disease burden in society, and is  
49 calculated as sum of years of life lost due to premature mortality and years lived with  
50 disability, Marcenes W, et al estimated that the global burden of oral conditions would  
51 increase by approximately 20% from 1990 to 2010.<sup>1,2</sup> In addition to their high  
52 prevalence, oral health conditions are a major contributor to socioeconomic disparities  
53 in health.<sup>3,4</sup>

54 Oral health reflects individuals' socioeconomic conditions as well as an  
55 important marker of future physical health conditions (e.g. cardiovascular disease).<sup>4-8</sup>  
56 The major indicators of socioeconomic positions (SEP) include income, wealth, education,  
57 and occupation.<sup>9</sup> SEP is associated not only with general health, but also with oral  
58 health. Some studies examined the associations between income/education and oral  
59 health; those who had higher income, or higher educational attainment had better oral  
60 health.<sup>10-14</sup> On the other hand, there are fewer studies on the association between  
61 occupational class and oral health. To our knowledge, only five previous studies  
62 examined the association between occupation and oral health.<sup>3, 15-18</sup> Poulton et al.  
63 examined the association of dental health (tooth cleanliness, gingival bleeding,  
64 periodontal disease and tooth decay) with combination of parental occupation in  
65 childhood with occupation in adulthood among 1,000 children in New Zealand; they  
66 reported significant social gradients among these oral conditions.<sup>3</sup> Sanders et al.  
67 examined data of 3,678 adults in Australia and reported that upper white collar

1  
2  
3  
4  
5  
6 68 workers reported less social impact, measured by the 14-item Oral Health Impact  
7  
8 69 Profile, than did workers in lower white-collar or blue-collar occupations.<sup>18</sup> Morita et al.  
9  
10 70 examined the association of occupations with oral conditions, based on approximately  
11  
12 71 16,000 Japanese workers; they reported that professionals had better oral conditions  
13  
14 72 than office workers and blue collar workers in Japan.<sup>15 16</sup> Tsakos et al. reported  
15  
16 73 significant social gradients in oral health, based on a sample of 6,600  
17  
18 74 community-dwelling English people aged 50 years and older.<sup>17</sup> However, none of these  
19  
20 75 considered workplace-related factors, such as social support, working hours, type of  
21  
22 76 employment or job stress, as potential mediators of the association between occupations  
23  
24 77 and oral health. Psychological stress is associated with the workplace-related factors as  
25  
26 78 well as occupations, and, on the other hand, oral diseases, such as periodontitis and  
27  
28 79 gingivitis, are also associated with psychological stress.<sup>19-22</sup> Therefore,  
29  
30 80 workplace-related factors may be candidates for mitigating oral health disparities. and,  
31  
32  
33 81 we hypothesized that job stress (including work hours) – as well as stress-buffering  
34  
35 82 factors such as workplace social support – would mediate the association between  
36  
37 83 occupational class and oral health.

38  
39 84 In this study, we first examined data of 3,201 workers aged 25-50 years old in  
40  
41 85 Japan to elucidate the associations between indicators of SEP (occupation, income  
42  
43 86 wealth, education and SEP in childhood) and oral health. We then examined the  
44  
45 87 mediation of socioeconomic disparities by workplace-related factors (social support in  
46  
47 88 workplace, job stress, working hours and type of employment).

48  
49  
50 89

## 51 52 90 **METHODS**

### 53 54 91 **Participants**

55  
56 92 We conducted the present study by using data from the J-SHINE (Japanese  
57  
58  
59  
60

1  
2  
3  
4  
5  
6 93 study of Stratification, Health, Income, and Neighborhood), the details of which have  
7  
8 94 been previously described.<sup>23</sup> In brief, between October 2010 and February 2011, 13,920  
9  
10 95 community-dwelling residents aged 25 to 50 years were probabilistically and randomly  
11  
12 96 selected from four municipalities in and around Tokyo, Japan, with using the Basic  
13  
14 97 Resident Registration System. Independent survey agencies were contracted to conduct  
15  
16 98 the surveys, and the professional surveyors who had more than three years of  
17  
18 99 experience in conducting interview-based social surveys made contacts with the eligible  
19  
20 100 individuals after attending training sessions to conduct the J-SHINE study. The main  
21  
22 101 reasons the surveyors were not able to receive responses from the eligible participants  
23  
24 102 were as follows: “inaccessible contact (n=4371)” and “refusal of invitation (n=3677)”. Of  
25  
26  
27 103 those who were invited, 4,385 men and women responded (31.6%) to the invitation;  
28  
29 104 these individuals formed the baseline of the J-SHINE study. A questionnaire was  
30  
31 105 self-administered using a computer-assisted personal interview format, unless the  
32  
33 106 participants requested a face-to-face interview. We excluded participants who did not  
34  
35 107 answer the question about self-rated oral health, or who responded that they were not  
36  
37 108 active in the labor market (including homemakers and students); this result in 3,201  
38  
39 109 eligible participants.

40  
41  
42 110

#### 43 111 Measurements

44  
45  
46 112 All measures in this study were obtained by self-report. Basic demographic  
47  
48 113 variables included sex (men/women), age (categorized as 25-29, 30-34, 35-39, 40-44, and  
49  
50 114 45-50 years old), and marital status (categorized as married/not married). Self-rated  
51  
52 115 oral health (SROH) was used to evaluate oral conditions. SROH is a screening tool that  
53  
54 116 can evaluate needs of dental care among people, especially those who do not usually  
55  
56 117 visit dentists, and its validity and high internal consistency have been confirmed.<sup>24 25</sup>  
57  
58  
59  
60



1  
2  
3  
4  
5  
6 118 SROH was assessed by the following question. *“Overall, how would you rate the health*  
7  
8 119 *of your teeth and gums?”* Potential responses ranged from *“1.excellent, 2.good, 3.fair,*  
9  
10 120 *4.not so good or 5.poor”*. In the analysis, the outcome was dichotomized:”1.excellent and  
11  
12 121 2.good, 3.fair” as “Good SROH”, and “4.not so good and 5.poor” as “Poor SROH”.

13  
14 122 As indicators of SEP, we used annual household income, wealth, educational  
15  
16 123 attainment, occupation, and economic situations during childhood. Annual household  
17  
18 124 income was divided into tertiles; less than JPY 5 million (Approximately GBP 29,400),  
19  
20 125 JPY 5 to 7.5 million (GBP 29,400-44,100), or more than JPY 7.5 million (GBP 44,100).  
21  
22 126 Wealth was based on household financial and other assets (e.g. stock, bond, and so on)  
23  
24 127 and was divided into tertiles; less than JPY 3 million (GBP 17,600), JPY 3 to 5 million  
25  
26 128 (GBP 17,600-29,400), or more than JPY 5 million (GBP 29,400). Educational attainment  
27  
28 129 was divided into three categories; high school or less, vocational/junior college, and  
29  
30 130 university or more. Occupational class was divided into three categories; professionals,  
31  
32 131 office workers or blue collar workers. Occupations were self-reported, but, in addition, a  
33  
34 132 sociologist on the team (K.K.) examined each response to determine the correct  
35  
36 133 classification based on the detailed job description provided by the participants. Our  
37  
38 134 method of occupational classification was previously used in “The national survey of  
39  
40 135 Social Stratification and social Mobility”, which has been conducted in Japan every ten  
41  
42 136 years since 1955 and is regarded as the most valid classification of occupations in  
43  
44 137 Japan.<sup>26</sup> Economic conditions in childhood were evaluated through the following  
45  
46 138 questions. *“How would you rate the economic conditions in your household at age five?”*  
47  
48 139 *and “How would you rate the economic conditions in your household at age fifteen?”*The  
49  
50 140 answers were selected from *“1.very difficult, 2. difficult, 3.normal, 4. well off 5. very well*  
51  
52 141 *off”*. In the analysis, the answers were divided into three groups: “1.very difficult, 2.  
53  
54 142 difficult”, “3.normal” and “4. well off 5. very well off”. This question was derived from  
55  
56  
57  
58  
59  
60

1  
2  
3  
4  
5  
6 143 the Comprehensive Survey of Living Conditions, which is annually conducted by the  
7  
8 144 Ministry of Health, Labour, and Welfare, and is regarded as a standard way to evaluate  
9  
10 145 subjective economic situation in Japan.

11  
12  
13  
14 146 With regard to workplace-related factors, job stress, social support in  
15  
16 147 workplace, working hours, and type of employment were used. Job stress was evaluated  
17  
18 148 by seven questions, which were taken from the Brief Job Stress Questionnaire (BJSQ).  
19  
20 149 BJSQ has been validated for use with Japanese workers, and consists of lists the 84  
21  
22 150 questions which assesses job stress, social support in workplace and subjective  
23  
24 151 physical/mental symptoms.<sup>27</sup> BJSQ has been used in workplaces in Japan and was used  
25  
26 152 in previous research in Japan.<sup>27 28</sup> One example of the seven questions on the job stress  
27  
28 153 was *"I have to deal with a lot of tasks"*, and the answer was chosen from *"1.yes, 2.rather*  
29  
30 154 *yes 3.rather no, 4.no"*. Aggregated scores for the seven questions were divided into  
31  
32 155 tertiles. Social support in workplace consisted of six questions, which were also taken  
33  
34 156 from BJSQ. One example of six questions was *"How reliable is your boss when you are*  
35  
36 157 *in trouble?"*, and the answer was chosen from *"1.very, 2.fairly 3.to some extent, 4.not"*.  
37  
38 158 Aggregated scores for the six questions were divided into tertiles. Working hours were  
39  
40 159 divided into four groups: less than 40 hours per week, 40 to 50 hours per week, 50 to 60  
41  
42 160 hours per week, or more than 60 hours per week. Type of employment was divided into  
43  
44 161 three groups: permanent, precarious or self-employment.

45  
46 162

47  
48 163 Statistical analysis

49  
50 164 Differences in background characteristics according to SROH (good or poor)  
51  
52 165 were compared using the chi-square test (Table1). We estimated logistic regression  
53  
54 166 models for the association between poor SROH and SEP. We computed sex- and age-  
55  
56 167 adjusted odds ratio (OR) and 95% confidence intervals (C.I.) for poor SROH among office  
57  
58  
59  
60

1  
2  
3  
4  
5  
6 168 workers and blue collar workers, compared with professionals. We also calculated the  
7  
8 169 ORs between each SEP and SROH (Table2), and the ORs between work-related factors  
9  
10 170 and SROH (Table3). Additionally, we estimated the multivariate ORs for the association  
11  
12 171 between occupations and SROH, adjusting for work-related factors, such as job stress  
13  
14 172 social support in workplace, working hours, and type of employment (Table4). With  
15  
16 173 regard to missing data on explanatory variables, we carried out 2 separate analyses. In  
17  
18 174 the first analysis, dummy variables were used for missing data, with creation of a  
19  
20 175 categorical indicator for missing responses (missing category) (Appendix Table1). In the  
21  
22 176 second analysis, we conducted multiple imputations for the missing data, included all  
23  
24 177 variables shown in Table1. Interactions between sex and the other variables  
25  
26 178 (age/marital status/job stress/social support in the workplace/working hour/type of  
27  
28 179 employment) were tested by entering multiplicative interaction terms into the  
29  
30 180 multivariate adjusted model, because employment situation in Japan is highly different  
31  
32 181 in men and women. SAS 9.3 (SAS Institute, Cary, NC) was used for all statistical  
33  
34 182 analyses, and “Proc MI” and “Proc MIANALYZE” were used for the multiple  
35  
36 183 imputations  
37  
38  
39  
40  
41  
42

## 185 Ethics

186 The study was approved by the ethics committee of the Graduate School of  
187 Medicine and Faculty of Medicine, The University of Tokyo.  
188

## 189 Results

190 The distribution of answers for the SROH was as follows; 1.excellent (N of 407),  
191 2.good (N of 772), 3.fair (N of 1155), 4.not so good (N of 738) and 5.poor (N of 129). Table  
192 1 describes the basic characteristics of the study participants according to level of SROH.

1  
2  
3  
4  
5  
6 193 All of the characteristics except marital status were significantly associated with SROH.  
7  
8 194 Poor SROH was more prevalent in men, older age-groups, blue collar workers,  
9  
10 195 precarious workers, as well as those with lower income, lower wealth, lower educational  
11  
12 196 attainment, higher childhood poverty, lower social support, higher stress and longer  
13  
14 197 working hours.

15  
16 198 Table 2 shows the sex- and age- adjusted odds ratios and 95% CI for the  
17  
18 199 associations between various indicators of SEP (occupation, income, wealth, education,  
19  
20 200 and two indicators of childhood SEP) and poor SROH. All indicators of SEP were  
21  
22 201 inversely associated with SROH. The association with SROH was significant only for  
23  
24 202 the lowest levels in occupation, income and childhood SEP, while the association was  
25  
26 203 comparatively larger in magnitude and significant for the intermediate levels as well as  
27  
28 204 for the lowest levels in education and wealth. Blue collar workers had significantly  
29  
30 205 higher OR of poor SROH (1.44, 95% CI: 1.07-1.95). Educational attainment, current  
31  
32 206 income, wealth and SEP during childhood were also associated with poor SROH.

33  
34 207 Table 3 describes crude ORs and 95% CI for associations between  
35  
36 208 workplace-related factors (job stress, social support in workplace, working hour and  
37  
38 209 type of employment) and poor SROH. All of the factors were associated with poor SROH.  
39  
40 210 Workers with the most stress as well as low social support had higher odds of poor  
41  
42 211 SROH compared with those with less job stress or more social support. Those who  
43  
44 212 reported working more than 60 hours per week had poorer SROH than those who  
45  
46 213 worked 40-50 hours per week (OR: 1.69, 95%CI 1.20-2.39). Precarious workers had  
47  
48 214 higher OR for poor oral health (1.32, 95% CI: 1.11-1.57), compared with permanent  
49  
50 215 workers.

51  
52 216 Table 4 shows the multivariate ORs and 95% CI for poor SROH from the  
53  
54 217 multiple imputation models. The associations between occupational class and poor  
55  
56  
57  
58  
59  
60

1  
2  
3  
4  
5  
6 218 SROH were substantially attenuated by work-related factors. Approximately 60% of the  
7  
8 219 association between occupations and poor SROH was explained by the work-related  
9  
10 220 factors.<sup>28</sup> In the multivariate model, all of the workplace-related factors (social support,  
11  
12 221 job stress, type of employment and working hours) were significantly associated with  
13  
14 222 poor SROH. Compared with the analysis that employed dummy categories for missing  
15  
16 223 values (Appendix Table1), we found similar results after accounting for missing values  
17  
18 224 using multiple imputations. None of the interactions were significant: occupation  
19  
20 225 (p=0.19), age (p=0.74), marital status (p=0.44), job stress (p=0.25), job support (p=0.50),  
21  
22 226 working hours (p=0.83), and type and employment (p=0.73).  
23  
24  
25  
26

## 27 228 **Discussion**

29  
30 229 In the present study, we found oral health disparity across various indicators of  
31  
32 230 SEP as well as childhood SEP among workers in Japan. Moreover, the association  
33  
34 231 between occupations and SROH was substantially explained by job-related factors. Our  
35  
36 232 finding is notable for demonstrating oral health disparities even in Japan, where the  
37  
38 233 citizens, including children, have access to dental services with relatively low  
39  
40 234 out-of-pocket cost. Our findings are consistent with a previous study by Morita et al.,  
41  
42 235 which reported that there were significant oral health disparities across occupations.<sup>16</sup>  
43  
44 236 We found oral health disparities across occupations as well as other indicators of SEP,  
45  
46 237 including income, wealth, and childhood SEP. Tsakos, et al. reported social gradients  
47  
48 238 across occupation, income, wealth and parental occupation, among older individuals in  
49  
50 239 England.<sup>17</sup>  
51

52  
53 240 One reason why people with higher SEP had better SROH may be related to  
54  
55 241 preventive practices – e.g. dental flossing or use of interdental brush (interproximal  
56  
57 242 brush). Neamatol et al. reported that students with doctorate or masters degrees flossed  
58  
59  
60

1  
2  
3  
4  
5  
6 243 more than those with bachelor degree or less<sup>29</sup>, while Tseveenjav et al. reported that  
7  
8 244 people with higher educational attainment performed cleaning more than the others.<sup>30</sup>  
9  
10 245 Another reason people in higher SEP had better SROH might be utilization of  
11  
12 246 preventive dentistry. People with lower incomes tend to use preventive dental service  
13  
14 247 less frequently<sup>31 32</sup>, and the difference of use in preventive service might explain the  
15  
16 248 social gradient of SROH. In fact, in the present study, approximately one in three  
17  
18 249 participants (32.3%) among the richest group made a preventive dental clinic visit in  
19  
20 250 the past year, whereas only one in four participants (24.7%) among the poorest group  
21  
22 251 did so. On the other hand, we did not observe a big difference among rich and poor  
23  
24 252 participants in the use of dental services for treatment; 42.3% for the richest group  
25  
26 253 versus 41.4% for the poorest group. Thus, the pathway from lower household income to  
27  
28 254 poor SROH might be through preventive dental service utilization.

29  
30  
31 255 Another explanation for the relationship between SEP and SROH might be  
32  
33 256 through psychosocial factors. Baker et al reported that greater sense of coherence and  
34  
35 257 higher self-esteem were linked to better oral health perceptions.<sup>33</sup> Therefore, these  
36  
37 258 factors might be mediators between SEP and SROH because those who are in higher  
38  
39 259 SEP, including occupations, have, in general, higher self-esteem and sense of coherence.

40  
41  
42 260 Our findings add to the previous literature by suggesting that occupational  
43  
44 261 inequalities in oral health can be substantially explained by work-based factors, such as,  
45  
46 262 social support in the workplace, job stress, working hours, and type of employment  
47  
48 263 (precarious vs. permanent). These workplace-related factors might be targets for  
49  
50 264 interventions to mitigate oral health disparities, i.e. in addition to intervening to  
51  
52 265 improve socioeconomic conditions, it may be possible focus on working conditions to  
53  
54 266 reduce oral health disparities.

55  
56  
57 267 Social support has been reported to have a “stress-buffering effect” on  
58  
59  
60

1  
2  
3  
4  
5  
6 268 cardiovascular diseases.<sup>34-36</sup> Stress has been reported as one of the exacerbating factors  
7  
8 269 for periodontitis or gingivitis. Hugo FN et al. reported that stress was a significant risk  
9  
10 270 factor for gingivitis<sup>21</sup>, and Krejci CB, et al. suggested that stress may hasten the  
11  
12 271 development and progression of periodontitis through the suppression of T-cell activity  
13  
14 272 or a reduction in salivary IgA.<sup>19 20</sup> Precarious employment was also significantly  
15  
16 273 associated with poor SROH in the multivariate model. Previous studies on precarious  
17  
18 274 employment showed that this form of work is associated with job insecurity and  
19  
20 275 psychological distress<sup>37 38</sup>, and, therefore, being in a precarious employment might also  
21  
22 276 a risk factor of developing periodontitis or gingivitis via stress. The number of  
23  
24 277 precarious employees has been increasing all over the world as well as in Japan. In  
25  
26 278 Japan 35.2% of total workers in 2012 were precarious workers, while only 16.4% were in  
27  
28 279 1985.<sup>39</sup>

30  
31 280 Previous studies have suggested a consistent link between early life-course  
32  
33 281 socioeconomic circumstances and health status in adulthood.<sup>3 5 40 41</sup> Our study is  
34  
35 282 consistent with previous research in showing an association between childhood SEP and  
36  
37 283 oral health. Poulton R et al. examined 1,000 children in New Zealand and found that  
38  
39 284 there was a **significant** social gradient of dental health (tooth cleanliness, gingival  
40  
41 285 bleeding, periodontal disease, and tooth decay) across childhood SEP.<sup>3</sup> **Thomson et al.**  
42  
43 286 **examined 789 individuals and revealed that those who were in low socioeconomic status**  
44  
45 287 **at age 5 years were more likely to have lost a tooth in adulthood because of caries and**  
46  
47 288 **had greater prevalence and extent of periodontitis.**<sup>5</sup> In our study, when poverty during  
48  
49 289 the childhood at age five or fifteen was added to the multivariate model, both poverty  
50  
51 290 during childhood at age five and at age fifteen were associated with poorer SROH (OR:  
52  
53 291 1.60, 95%CI: 1.23-2.08 at age five, and OR: 1.47, 95%CI: 1.15-1.87 at age fifteen,  
54  
55 292 respectively, not shown in tables). These two factors seemed to be independently  
56  
57  
58  
59  
60

1  
2  
3  
4  
5  
6 293 associated with SROH, because coefficients of the other covariates in the multivariate  
7  
8 294 model hardly changed before and after adding the childhood poverty variables to the  
9  
10 295 multivariate model. Therefore, poverty during childhood appears to affect SROH in  
11  
12 296 adulthood separately from sex, age, and the current workplace-related factors.  
13

14 297

15  
16 298 · Limitations

17  
18 299 There are some limitations in this study. First, SROH is a subjective  
19  
20 300 measurement. Some might argue that this type of measurement might be invalid,  
21  
22 301 however, self-rated oral health has been examined and reported to be a well-validated  
23  
24 302 and reliable index.<sup>24 25</sup> Jones JA et al. validated the association between a single-item  
25  
26 303 self-report question and oral clinical examination among two hundred thirty-two  
27  
28 304 community-dwelling participants. The question was “*How would you describe the*  
29  
30 305 *health of your teeth and gums? Would you say it is excellent, very good, good, fair or*  
31  
32 306 *poor?*” They reported that the single-item self-reported question had a sensitivity of 0.75  
33  
34 307 and a specificity of 0.67 in identifying persons with severe need for denture care,  
35  
36 308 compared with the clinical examination.<sup>24</sup> The validation studies were conducted in  
37  
38 309 English, and the present study was conducted in Japanese. As far as we know, no  
39  
40 310 previous studies have validated the scale in Japanese yet. However, we have confirmed  
41  
42 311 that poor SROH was significantly associated with number of removed tooth in the  
43  
44 312 sample (Appendix Table2). Ando et al confirmed the validity of self-reported number of  
45  
46 313 remaining teeth and clinical examination in Japanese.<sup>42</sup> Therefore, this might support  
47  
48 314 that the scale in Japanese is also valid. Future studies are needed to clarify the validity  
49  
50 315 of the scale in Japanese. Secondly, the response rate was low. However, Takada et. al.  
51  
52 316 compared the collected sample with the vital statistics in Census 2010 of the target  
53  
54 317 population and reported that the obtained sample was properly equivalent with respect  
55  
56  
57  
58  
59  
60



1  
2  
3  
4  
5  
6 318 to age, sex, and education.<sup>23</sup> Therefore, it is likely that the selection bias does not matter  
7  
8 319 in terms of age, sex and education. We are not able to discuss selection bias precisely  
9  
10 320 because we do not have other information among non-responders, such as smoking  
11  
12 321 habit, income and so on. Thirdly, the data used in this study was cross-sectional, not  
13  
14 322 longitudinal, therefore, we cannot infer causality. Thus, low SEP could cause worse oral  
15  
16 323 health; but the reverse is also possible, i.e. it is well described that poor dental status  
17  
18 324 can lead to social stigma and adversely impact people's chances of employment and  
19  
20 325 success in life.<sup>43</sup> Attention should be given to the positive association between current  
21  
22 326 poor SROH and economic disadvantage in childhood, because the assessments of  
23  
24 327 economic disadvantage in childhood were based on the participants' recall (recall bias).  
25  
26  
27 328 Fourth, we did not gather data on brushing frequency or use of interdental brush/dental  
28  
29 329 flossing<sup>30</sup>, and we could not include these factors in the analysis. Some studies reported  
30  
31 330 that people with lower educational attainment or low income use interdental  
32  
33 331 brush/dental flossing less, and this might explain the association between SEPs and  
34  
35 332 poorer SROH. Finally, the 7 items for job stress and the 6 items for social support at  
36  
37 333 workplace were not validated. However, both have been used in practice in Japan, and  
38  
39 334 the internal consistency of the scale in the present participants was acceptably high:  
40  
41 335 Cronbach's alpha coefficient was 0.90 for the 7 items for job stress, and 0.91 for the 6  
42  
43 336 items for social support. Future studies should employ well-validated questions on job  
44  
45 337 stress and social support.  
46  
47  
48 338

## 339 Conclusion

340 We found oral health disparities across various SEPs, and that work-related  
341 factors could account for more than half the association between occupation and SROH.  
342 Improving workplace environments may present a viable solution to reduce oral health

1  
2  
3  
4  
5  
6 343 disparities. Future studies on the effect of workplace-related factors on oral health  
7  
8 344 should use longitudinal data to elucidate the causal association between the  
9  
10 345 workplace-related factors and oral health.  
11

12 346

13  
14 347

15  
16 348 **Acknowledgments**

17  
18 349 The authors thank Prof. Hideki Hashimoto, Prof. Norito Kawakami and their  
19  
20 350 team for providing us with data from the Japanese Study of Stratification, Health,  
21  
22 351 Income, and Neighborhood (J-SHINE). The authors also thank Dr. Akiomi Inoue and Dr.  
23  
24 352 Hiroshi Kanbayashi for his valuable advice.  
25

26  
27 353

28  
29 354

30  
31 355 **Contributors:** TT, JA, IK, KK, and KO made substantial contribution to the concept and  
32  
33 356 design of the study. TT drafted the manuscript and JA, IK, KK, and KO revised it  
34  
35 357 critically for important intellectual content. TT, JA, IK, KK, and KO approved the final  
36  
37 358 version of the manuscript.  
38

39 359

40  
41 360 **Competing interest:** None declared.  
42

43  
44 361

45  
46 362 **Funding:** This work was supported by a Grant-in-Aid for Scientific Research on  
47  
48 363 Innovative Areas 2009-2013 (No. 21119002, No. 21119001 and 21119007) from the  
49  
50 364 Ministry of Education, Culture, Sports, Science and Technology, Japan. T Tsuboya is  
51  
52 365 supported by Grant-in-Aid for Epidemiological Research (St. Luke's Life Science  
53  
54 366 Institute). These sponsors were not involved in study design and the collection, analysis,  
55  
56 367 and interpretation of data and the writing of the article and the decision to submit it for  
57  
58

1  
2  
3  
4  
5  
6 368 publication.  
7

8 369

9  
10 370 **Data sharing:** No additional data are available.  
11

12 371

13  
14 372  
15  
16  
17  
18  
19  
20  
21  
22  
23  
24  
25  
26  
27  
28  
29  
30  
31  
32  
33  
34  
35  
36  
37  
38  
39  
40  
41  
42  
43  
44  
45  
46  
47  
48  
49  
50  
51  
52  
53  
54  
55  
56  
57  
58  
59  
60

For peer review only

Table 1. Characteristics of participants by status of self-rated oral health (SROH) among 3,201 men and women aged 25-50 years old in Japan during 2010-2011

| Characteristic                                                     | Poor SROH <sup>a</sup> |        | <i>p-value</i> <sup>b</sup> |
|--------------------------------------------------------------------|------------------------|--------|-----------------------------|
|                                                                    | n                      | (%)    |                             |
| Sex                                                                |                        |        |                             |
| Men                                                                | 529                    | (29.7) | 0.0002                      |
| Women                                                              | 334                    | (23.8) |                             |
| Age                                                                |                        |        |                             |
| 25-29                                                              | 132                    | (22.5) | 0.0001                      |
| 30-34                                                              | 138                    | (25.0) |                             |
| 35-39                                                              | 173                    | (27.2) |                             |
| 40-44                                                              | 175                    | (25.8) |                             |
| 45-50                                                              | 225                    | (33.8) |                             |
| Marital status                                                     |                        |        |                             |
| Married                                                            | 597                    | (27.9) | 0.14                        |
| Not married <sup>c</sup>                                           | 269                    | (25.5) |                             |
| Occupations                                                        |                        |        |                             |
| Specialists                                                        | 83                     | (28.0) | 0.0009                      |
| White collar workers                                               | 497                    | (24.9) |                             |
| Blue collar workers                                                | 287                    | (31.5) |                             |
| Annual household income                                            |                        |        |                             |
| Less than 5 million JPY (Approximately GBP 29,400) <sup>d</sup>    | 226                    | (32.3) | 0.0012                      |
| 5-7.5 million JPY (Approximately GBP 29,400-44,100) <sup>d</sup>   | 179                    | (26.6) |                             |
| More than 7.5 mil JPY (Approximately GBP 44,100) <sup>d</sup>      | 250                    | (24.3) |                             |
| Wealth (Household financial and other assets)                      |                        |        |                             |
| Less than 3 million JPY (Approximately GBP 17,600) <sup>d</sup>    | 201                    | (34.7) | <.0001                      |
| 3-5 million JPY (Approximately GBP 17,600-29,400) <sup>d</sup>     | 169                    | (30.2) |                             |
| More than 5 million JPY (Approximately GBP 29,400) <sup>d</sup>    | 173                    | (22.9) |                             |
| Education                                                          |                        |        |                             |
| High school or less                                                | 263                    | (36.3) | <.0001                      |
| Vocational/junior college                                          | 262                    | (26.9) |                             |
| University or more                                                 | 333                    | (22.7) |                             |
| Economic situation at home when respondents were five years old    |                        |        |                             |
| Poor, very poor                                                    | 226                    | (34.8) | <.0001                      |
| Normal                                                             | 502                    | (25.7) |                             |
| Well-off, very well-off                                            | 133                    | (23.5) |                             |
| Economic situation at home when respondents were fifteen years old |                        |        |                             |
| Poor, very poor                                                    | 216                    | (35.9) | <.0001                      |
| Normal                                                             | 467                    | (24.8) |                             |
| Well-off, very well-off                                            | 180                    | (25.9) |                             |

|    |                               |     |        |        |
|----|-------------------------------|-----|--------|--------|
| 1  | Job stress                    |     |        |        |
| 2  | 1st tertile(least stressful)  | 289 | (25.2) |        |
| 3  | 2nd tertile                   | 272 | (25.2) | 0.0017 |
| 4  | 3rd tertile(most stressful)   | 300 | (31.3) |        |
| 5  | Social support in workplace   |     |        |        |
| 6  | 1st tertile(most supportive)  | 266 | (23.4) |        |
| 7  | 2nd tertile                   | 278 | (29.1) | 0.0014 |
| 8  | 3rd tertile(least supportive) | 295 | (29.8) |        |
| 9  | Working hours per week        |     |        |        |
| 10 | <40                           | 360 | (26.7) |        |
| 11 | 40-50                         | 162 | (23.5) |        |
| 12 | 50-60                         | 81  | (26.3) | 0.027  |
| 13 | >60                           | 67  | (34.2) |        |
| 14 | Type of employment            |     |        |        |
| 15 | Permanent                     | 526 | (25.3) |        |
| 16 | Precarious                    | 272 | (30.9) | 0.0083 |
| 17 | Self-employed                 | 66  | (27.3) |        |

<sup>a</sup> The status of SROH was determined by the question: "Overall, how would you rate the health of your teeth and gums?". "Poor SROH" includes respondents of "not so good" and "poor", and "Good SROH" includes respondents of "excellent", "good" and "fair"

<sup>b</sup> P-value was calculated by chi-squared test.

<sup>c</sup> Divorced/separated and widow people were classified into "not married".

<sup>d</sup> Income and wealth were converted at 170 JPY (Japanese Yen) to 1 GBP (Great Britain Pound).

Table 2. Age- and sex- adjusted odds ratios and 95% confidence intervals for associations between socioeconomic positions and poor self-rated oral health among 3,201 men and women aged 25-50 years old in Japan during 2010-2011.

| Independent variable                                                      | odds ratio | 95% confidence interval | <i>p</i> -value |
|---------------------------------------------------------------------------|------------|-------------------------|-----------------|
| <b>Occupations</b>                                                        |            |                         |                 |
| Professionals                                                             | 1.00       |                         |                 |
| Office workers                                                            | 1.05       | ( 0.79 - 1.39 )         | 0.75            |
| Blue collar workers                                                       | 1.44       | ( 1.07 - 1.95 )         | 0.017           |
| <b>Household income</b>                                                   |            |                         |                 |
| Lowest tertile                                                            | 1.72       | ( 1.38 - 2.16 )         | <.0001          |
| Second tertile                                                            | 1.18       | ( 0.94 - 1.48 )         | 0.15            |
| Highest tertile (richest)                                                 | 1.00       |                         |                 |
| <b>Wealth (Household financial and other assets)</b>                      |            |                         |                 |
| Lowest tertile                                                            | 1.93       | ( 1.51 - 2.46 )         | <.0001          |
| Second tertile                                                            | 1.55       | ( 1.20 - 1.99 )         | 0.0007          |
| Highest tertile (richest)                                                 | 1.00       |                         |                 |
| <b>Educational attainment</b>                                             |            |                         |                 |
| High school or less                                                       | 1.98       | ( 1.63 - 2.42 )         | <.0001          |
| Vocational/junior college                                                 | 1.38       | ( 1.14 - 1.68 )         | 0.0012          |
| University or more                                                        | 1.00       |                         |                 |
| <b>Economic situation at home when respondents were five years old</b>    |            |                         |                 |
| Poor, very poor                                                           | 1.61       | ( 1.25 - 2.08 )         | 0.0003          |
| Normal                                                                    | 1.07       | ( 0.86 - 1.34 )         | 0.55            |
| Well-off, very well-off                                                   | 1.00       |                         |                 |
| <b>Economic situation at home when respondents were fifteen years old</b> |            |                         |                 |
| Poor, very poor                                                           | 1.53       | ( 1.20 - 1.95 )         | 0.0006          |
| Normal                                                                    | 0.91       | ( 0.74 - 1.11 )         | 0.33            |
| Well-off, very well-off                                                   | 1.00       |                         |                 |

SROH was assessed by the following question. "Overall, how would you rate the health of your teeth and gums?" Potential responses ranged from "1.excellent, 2.good, 3.fair, 4.not so good or 5.poor". In the analysis, the outcome was dichotomized: "1.excellent and 2.good, 3.fair" as "Good SROH", and "4.not so good and 5.poor" as "Poor SROH".

Table 3. Crude odds ratios and 95% confidence intervals for associations between workplace-related factors and poor self-rated oral health among 3,201 men and women aged 25-50 years old in Japan during 2010-2011.

| Independent variable          | odds ratio | 95% confidence interval | <i>p</i> -value |
|-------------------------------|------------|-------------------------|-----------------|
| Job stress                    |            |                         |                 |
| 1st tertile(least stressful)  | 1.00       |                         |                 |
| 2nd tertile                   | 1.00       | ( 0.83 - 1.21 )         | 0.99            |
| 3rd tertile(most stressful)   | 1.36       | ( 1.12 - 1.64 )         | 0.0018          |
| Social support in workplace   |            |                         |                 |
| 1st tertile(most supportive)  | 1.00       |                         |                 |
| 2nd tertile                   | 1.34       | ( 1.10 - 1.63 )         | 0.0033          |
| 3rd tertile(least supportive) | 1.39       | ( 1.14 - 1.68 )         | 0.001           |
| Working hours per week        |            |                         |                 |
| <40                           | 1.19       | ( 0.96 - 1.47 )         | 0.12            |
| 40-50                         | 1.00       |                         |                 |
| 50-60                         | 1.16       | ( 0.85 - 1.58 )         | 0.34            |
| >60                           | 1.69       | ( 1.20 - 2.39 )         | 0.0027          |
| Type of employment            |            |                         |                 |
| Permanent                     | 1.00       |                         |                 |
| Precarious                    | 1.32       | ( 1.11 - 1.57 )         | 0.002           |
| Self-employed                 | 1.10       | ( 0.82 - 1.49 )         | 0.52            |

SROH was assessed by the following question. “Overall, how would you rate the health of your teeth and gums?” Potential responses ranged from “1.excellent, 2.good, 3.fair, 4.not so good or 5.poor”. In the analysis, the outcome was dichotomized: “1.excellent and 2.good, 3.fair” as “Good SROH”, and “4.not so good and 5.poor” as “Poor SROH”.

Table 4. Multivariate odds ratios and 95% confidence intervals from multiple imputation analysis for associations with poor self-rated oral health among 3,201 men and women aged 25-50 years old in Japan during 2010-2011

| Independent variable               | odds ratio | 95%<br>confidence<br>interval | <i>p-value</i> |
|------------------------------------|------------|-------------------------------|----------------|
| <b>Occupations</b>                 |            |                               |                |
| Professionals                      | 1.00       |                               |                |
| Office workers                     | 0.97       | ( 0.73 - 1.29 )               | 0.82           |
| Blue collar workers                | 1.18       | ( 0.86 - 1.61 )               | 0.29           |
| <b>Sex</b>                         |            |                               |                |
| Men                                | 1.61       | ( 1.33 - 1.96 )               | <.0001         |
| Women                              | 1.00       |                               |                |
| <b>Age</b>                         |            |                               |                |
| 25-29                              | 0.88       | ( 0.66 - 1.16 )               | 0.36           |
| 30-34                              | 1.00       |                               |                |
| 35-39                              | 1.10       | ( 0.85 - 1.44 )               | 0.45           |
| 40-44                              | 0.99       | ( 0.76 - 1.30 )               | 0.96           |
| 45-50                              | 1.49       | ( 1.14 - 1.93 )               | 0.0033         |
| <b>Marital status</b>              |            |                               |                |
| Married                            | 1.00       |                               |                |
| Not married <sup>b</sup>           | 1.01       | ( 0.84 - 1.22 )               | 0.89           |
| <b>Job stress</b>                  |            |                               |                |
| 1st tertile(least stressful)       | 1.00       |                               |                |
| 2nd tertile                        | 0.96       | ( 0.79 - 1.17 )               | 0.71           |
| 3rd tertile(most stressful)        | 1.26       | ( 1.03 - 1.54 )               | 0.025          |
| <b>Social support in workplace</b> |            |                               |                |
| 1st tertile(most supportive)       | 1.00       |                               |                |
| 2nd tertile                        | 1.25       | ( 1.02 - 1.52 )               | 0.029          |
| 3rd tertile(least supportive)      | 1.23       | ( 1.01 - 1.5 )                | 0.042          |
| <b>Working hours per week</b>      |            |                               |                |
| <40                                | 1.12       | ( 0.88 - 1.43 )               | 0.35           |
| 40-50                              | 1.00       |                               |                |
| 50-60                              | 1.06       | ( 0.72 - 1.57 )               | 0.75           |
| >60                                | 1.41       | ( 0.99 - 2.01 )               | 0.06           |
| <b>Type of employment</b>          |            |                               |                |
| Permanent                          | 1.00       |                               |                |
| Precarious                         | 1.57       | ( 1.26 - 1.96 )               | <.0001         |
| Self-employed                      | 1.12       | ( 0.82 - 1.53 )               | 0.49           |



1  
2  
3  
4  
5 a. SROH was assessed by the following question. “Overall, how would you rate the health of your  
6 teeth and gums?” Potential responses ranged from “1.excellent, 2.good, 3.fair, 4.not so good or  
7 5.poor”. In the analysis, the outcome was dichotomized:”1.excellent and 2.good, 3.fair” as “Good  
8 SROH”, and “4.not so good and 5.poor” as “Poor SROH”.  
9

10  
11  
12 b. Divorced/separated and widow people were classified into “not married”.  
13  
14  
15  
16  
17  
18  
19  
20  
21  
22  
23  
24  
25  
26  
27  
28  
29  
30  
31  
32  
33  
34  
35  
36  
37  
38  
39  
40  
41  
42  
43  
44  
45  
46  
47  
48  
49  
50  
51  
52  
53  
54  
55  
56  
57  
58  
59  
60

For peer review only

## References

1. Murray CJ, Vos T, Lozano R, et al. Disability-adjusted life years (DALYs) for 291 diseases and injuries in 21 regions, 1990-2010: a systematic analysis for the Global Burden of Disease Study 2010. *Lancet* 2012;**380**(9859):2197-223.
2. Marcenes W, Kassebaum NJ, Bernabe E, et al. Global burden of oral conditions in 1990-2010: a systematic analysis. *Journal of dental research* 2013;**92**(7):592-7.
3. Poulton R, Caspi A, Milne BJ, et al. Association between children's experience of socioeconomic disadvantage and adult health: a life-course study. *Lancet* 2002;**360**(9346):1640-5.
4. Sabbah W, Watt RG, Sheiham A, et al. Effects of allostatic load on the social gradient in ischaemic heart disease and periodontal disease: evidence from the Third National Health and Nutrition Examination Survey. *Journal of epidemiology and community health* 2008;**62**(5):415-20.
5. Thomson WM, Poulton R, Milne BJ, et al. Socioeconomic inequalities in oral health in childhood and adulthood in a birth cohort. *Community dentistry and oral epidemiology* 2004;**32**(5):345-53.
6. Sabbah W, Tsakos G, Sheiham A, et al. The role of health-related behaviors in the socioeconomic disparities in oral health. *Social science & medicine* 2009;**68**(2):298-303.

- 1  
2  
3  
4  
5  
6 7. Aida J, Kondo K, Yamamoto T, et al. Oral health and cancer, cardiovascular, and  
7  
8 respiratory mortality of Japanese. *Journal of dental research* 2011;**90**(9):1129-35.  
9  
10  
11 8. Polzer I, Schwahn C, Volzke H, et al. The association of tooth loss with all-cause and  
12  
13 circulatory mortality. Is there a benefit of replaced teeth? A systematic review and  
14  
15 meta-analysis. *Clinical oral investigations* 2012;**16**(2):333-51.  
16  
17  
18 9. Kawachi I, Berkman L. *Social Epidemiology*. 1st edition: Oxford University Press, USA,  
19  
20 2000.  
21  
22  
23 10. Drury TF, Garcia I, Adesanya M. Socioeconomic disparities in adult oral health in the  
24  
25 United States. *Annals of the New York Academy of Sciences* 1999;**896**:322-4.  
26  
27  
28 11. Astrom AN, Haugejorden O, Skaret E, et al. Oral Impacts on Daily Performance in  
29  
30 Norwegian adults: the influence of age, number of missing teeth, and  
31  
32 socio-demographic factors. *European journal of oral sciences* 2006;**114**(2):115-21.  
33  
34  
35 12. Lopez R, Fernandez O, Baelum V. Social gradients in periodontal diseases among  
36  
37 adolescents. *Community dentistry and oral epidemiology* 2006;**34**(3):184-96.  
38  
39  
40 13. Sabbah W, Tsakos G, Chandola T, et al. Social gradients in oral and general health.  
41  
42 *Journal of dental research* 2007;**86**(10):992-6.  
43  
44  
45 14. Tsakos G, Sheiham A, Iliffe S, et al. The impact of educational level on oral  
46  
47 health-related quality of life in older people in London. *European journal of oral*  
48  
49 *sciences* 2009;**117**(3):286-92.  
50  
51  
52 15. Morita I, Nakagaki H, Yoshii S, et al. Gradients in periodontal status in Japanese  
53  
54  
55  
56  
57  
58  
59  
60

- 1  
2  
3  
4  
5  
6 employed males. *Journal of clinical periodontology* 2007;**34**(11):952-6.  
7  
8  
9 16. Morita I, Nakagaki H, Yoshii S, et al. Is there a gradient by job classification in dental  
10  
11 status in Japanese men? *European journal of oral sciences* 2007;**115**(4):275-9.  
12  
13  
14 17. Tsakos G, Demakakos P, Breeze E, et al. Social gradients in oral health in older adults:  
15  
16 findings from the English longitudinal survey of aging. *American journal of public*  
17  
18 *health* 2011;**101**(10):1892-9.  
19  
20  
21 18. Sanders AE, Spencer AJ. Social inequality in perceived oral health among adults in  
22  
23 Australia. *Australian and New Zealand journal of public health* 2004;**28**(2):159-66.  
24  
25  
26 19. Seymour GJ. Importance of the host response in the periodontium. *Journal of clinical*  
27  
28 *periodontology* 1991;**18**(6):421-6.  
29  
30  
31 20. Krejci CB, Bissada NF. Periodontitis--the risks for its development. *General dentistry*  
32  
33 2000;**48**(4):430-6; quiz 37-8.  
34  
35  
36 21. Hugo FN, Hilgert JB, Bozzetti MC, et al. Chronic stress, depression, and cortisol levels  
37  
38 as risk indicators of elevated plaque and gingivitis levels in individuals aged 50  
39  
40  
41  
42  
43 years and older. *Journal of periodontology* 2006;**77**(6):1008-14.  
44  
45  
46 22. Doyle CJ, Bartold PM. How does stress influence periodontitis? *Journal of the*  
47  
48 *International Academy of Periodontology* 2012;**14**(2):42-9.  
49  
50  
51 23. Takada M, Kondo N, Hashimoto H. Japanese study on stratification, health, income, and  
52  
53  
54 neighborhood: study protocol and profiles of participants. *Journal of epidemiology /*  
55  
56 *Japan Epidemiological Association* 2014;**24**(4):334-44.  
57  
58  
59  
60

- 1  
2  
3  
4  
5  
6 24. Jones JA, Spiro A, 3rd, Miller DR, et al. Need for dental care in older veterans:  
7  
8 assessment of patient-based measures. Journal of the American Geriatrics Society  
9  
10 2002;**50**(1):163-8.  
11  
12
- 13 25. Jones JA, Kressin NR, Miller DR, et al. Comparison of patient-based oral health outcome  
14  
15 measures. Quality of life research : an international journal of quality of life aspects  
16  
17 of treatment, care and rehabilitation 2004;**13**(5):975-85.  
18  
19
- 20 26. Grusky DB, Sato Y, Jan O, et al. Social Mobility in Japan: A New Approach to Modeling  
21  
22 Trend in Mobility. 2008.  
23  
24 [http://www.stanford.edu/group/scspi/grusky/article\\_files/social\\_mobility\\_japan.pdf](http://www.stanford.edu/group/scspi/grusky/article_files/social_mobility_japan.pdf).  
25  
26  
27 Accessed Apr. 15<sup>th</sup> 2014.  
28  
29
- 30 27. Inoue A, Kawakami N, Shimomitsu T, et al. Development of a short questionnaire to  
31  
32 measure an extended set of job demands, job resources, and positive health  
33  
34 outcomes: the new brief job stress questionnaire. Industrial health  
35  
36 2014;**52**(3):175-89.  
37  
38
- 39 28. Kato S, Doi Y, Tsutsui S, et al. [Job stress among Japan Overseas Cooperation  
40  
41 volunteers--using the Brief Job Stress Questionnaire]. Sangyo eiseigaku zasshi =  
42  
43 Journal of occupational health 2004;**46**(6):191-200.  
44  
45  
46  
47  
48  
49
- 50 29. Neamatollahi H, Ebrahimi M. Oral health behavior and its determinants in a group of  
51  
52 Iranian students. Indian journal of dental research : official publication of Indian  
53  
54 Society for Dental Research 2010;**21**(1):84-8.  
55  
56  
57  
58  
59  
60

- 1  
2  
3  
4  
5  
6 30. Tseveenjav B, Suominen-Taipale L, Varsio S, et al. Patterns of oral cleaning habits and  
7  
8 use of fluoride among dentate adults in Finland. *Oral health & preventive dentistry*  
9  
10 2010;**8**(3):287-94.  
11  
12  
13  
14 31. Pizarro V, Ferrer M, Domingo-Salvany A, et al. The utilization of dental care services  
15  
16 according to health insurance coverage in Catalonia (Spain). *Community dentistry*  
17  
18 and oral epidemiology 2009;**37**(1):78-84.  
19  
20  
21  
22 32. Chi DL, Rossitch KC, Beeles EM. Developmental delays and dental caries in low-income  
23  
24 preschoolers in the USA: a pilot cross-sectional study and preliminary explanatory  
25  
26 model. *BMC oral health* 2013;**13**:53.  
27  
28  
29  
30 33. Baker SR, Mat A, Robinson PG. What psychosocial factors influence adolescents' oral  
31  
32 health? *Journal of dental research* 2010;**89**(11):1230-5.  
33  
34  
35 34. Gerin W, Milner D, Chawla S, et al. Social support as a moderator of cardiovascular  
36  
37 reactivity in women: a test of the direct effects and buffering hypotheses.  
38  
39 *Psychosomatic medicine* 1995;**57**(1):16-22.  
40  
41  
42  
43 35. Uchino BN, Cacioppo JT, Kiecolt-Glaser JK. The relationship between social support and  
44  
45 physiological processes: a review with emphasis on underlying mechanisms and  
46  
47 implications for health. *Psychological bulletin* 1996;**119**(3):488-531.  
48  
49  
50  
51 36. Uchino BN. Social support and health: a review of physiological processes potentially  
52  
53 underlying links to disease outcomes. *Journal of behavioral medicine*  
54  
55 2006;**29**(4):377-87.  
56  
57  
58  
59  
60

- 1  
2  
3  
4  
5  
6 37. Tsurugano S, Inoue M, Yano E. Precarious employment and health: analysis of the  
7  
8 Comprehensive National Survey in Japan. *Industrial health* 2012;**50**(3):223-35.  
9  
10  
11 38. Vives A, Amable M, Ferrer M, et al. Employment precariousness and poor mental health:  
12  
13 evidence from Spain on a new social determinant of health. *Journal of*  
14  
15 *environmental and public health* 2013;**2013**:978656.  
16  
17  
18 39. Ministry of Health, Labour and Welfare. Current situation on precarious workers (in  
19  
20 Japanese).  
21  
22 [http://www.mhlw.go.jp/seisakunitsuite/bunya/koyou\\_roudou/part\\_haken/genjou/](http://www.mhlw.go.jp/seisakunitsuite/bunya/koyou_roudou/part_haken/genjou/)  
23  
24  
25 Accessed Apr. 15<sup>th</sup> 2014.  
26  
27  
28  
29 40. Lynch JW, Kaplan GA, Cohen RD, et al. Childhood and adult socioeconomic status as  
30  
31 predictors of mortality in Finland. *Lancet* 1994;**343**(8896):524-7.  
32  
33  
34 41. Black RE, Victora CG, Walker SP, et al. Maternal and child undernutrition and  
35  
36 overweight in low-income and middle-income countries. *Lancet*  
37  
38 2013;**382**(9890):427-51.  
39  
40  
41 42. Ando Y, Ikeda S, and Yoshihara A. The reliability of self-assessment of number of  
42  
43 remaining teeth using questionnaires. *Journal of Dental Health* 1997(47):657-62.  
44  
45  
46 43. Horton S, Barker JC. Stigmatized biologies: Examining the cumulative effects of oral  
47  
48 health disparities for Mexican American farmworker children. *Medical anthropology*  
49  
50 quarterly 2010;**24**(2):199-219.  
51  
52  
53  
54  
55  
56  
57  
58  
59  
60

1  
2  
3  
4  
5  
6  
7  
8  
9  
10  
11  
12  
13  
14  
15  
16  
17  
18  
19  
20  
21  
22  
23  
24  
25  
26  
27  
28  
29  
30  
31  
32  
33  
34  
35  
36  
37  
38  
39  
40  
41  
42  
43  
44  
45  
46  
47  
48  
49

Appendix Table1. Multivariate odds ratios and 95% confidence intervals for associations with poor self-rated oral health among 3,201 men and women aged 25-50 years old in Japan during 2010-2011

| Independent variable  | odds ratio | 95% confidence interval | <i>p-value</i> |
|-----------------------|------------|-------------------------|----------------|
| <b>Occupations</b>    |            |                         |                |
| Professionals         | 1.00       |                         |                |
| Office workers        | 0.96       | ( 0.72 - 1.29 )         | 0.79           |
| Blue collar workers   | 1.18       | ( 0.86 - 1.61 )         | 0.31           |
| <b>Sex</b>            |            |                         |                |
| Men                   | 1.61       | ( 1.32 - 1.96 )         | <.0001         |
| Women                 | 1.00       |                         |                |
| <b>Age</b>            |            |                         |                |
| 25-29                 | 0.86       | ( 0.65 - 1.14 )         | 0.29           |
| 30-34                 | 1.00       |                         |                |
| 35-39                 | 1.10       | ( 0.85 - 1.44 )         | 0.46           |
| 40-44                 | 1.00       | ( 0.77 - 1.30 )         | 0.98           |
| 45-50                 | 1.52       | ( 1.17 - 1.98 )         | 0.0016         |
| <b>Marital status</b> |            |                         |                |
| Married               | 1.00       |                         |                |
| Not married           | 0.99       | ( 0.82 - 1.19 )         | 0.91           |



|                               |      |                 |  |        |
|-------------------------------|------|-----------------|--|--------|
| Job stress                    |      |                 |  |        |
| 1st tertile(least stressful)  | 1.00 |                 |  |        |
| 2nd tertile                   | 0.96 | ( 0.79 - 1.17 ) |  | 0.66   |
| 3rd tertile(most stressful)   | 1.25 | ( 1.02 - 1.54 ) |  | 0.03   |
| Social support in workplace   |      |                 |  |        |
| 1st tertile(most supportive)  | 1.00 |                 |  |        |
| 2nd tertile                   | 1.25 | ( 1.02 - 1.52 ) |  | 0.031  |
| 3rd tertile(least supportive) | 1.24 | ( 1.01 - 1.51 ) |  | 0.039  |
| Working hours per week        |      |                 |  |        |
| <40                           | 1.15 | ( 0.92 - 1.45 ) |  | 0.23   |
| 40-50                         | 1.00 |                 |  |        |
| 50-60                         | 1.05 | ( 0.76 - 1.44 ) |  | 0.78   |
| >60                           | 1.48 | ( 1.04 - 2.11 ) |  | 0.031  |
| Type of employment            |      |                 |  |        |
| Permanent                     | 1.00 |                 |  |        |
| Precarious                    | 1.52 | ( 1.22 - 1.90 ) |  | 0.0002 |
| Self-employed                 | 1.11 | ( 0.80 - 1.54 ) |  | 0.53   |

---

Dummy variables were used for missing data, with creation of a categorical indicator for missing responses (missing category) in the analysis.

**Appendix Table2. Association between poor self-rated oral health (SROH) and self-reported number of removed tooth**

|                               |                   | Number of removed tooth |            |           |           |           |             | <i>p-value</i> <sup>b</sup> |
|-------------------------------|-------------------|-------------------------|------------|-----------|-----------|-----------|-------------|-----------------------------|
|                               |                   | 0                       | 1          | 2         | 3         | 4         | More than 4 |                             |
| <b>Poor SROH</b> <sup>a</sup> | <b>Number (%)</b> | 300 (17.2)              | 112 (30.0) | 94 (34.7) | 67 (45.0) | 52 (48.6) | 135 (58.4)  | <.0001                      |
| <b>Total</b>                  |                   | 1740                    | 373        | 271       | 149       | 107       | 231         |                             |

a. SROH was assessed by the following question. “Overall, how would you rate the health of your teeth and gums?” Potential responses ranged from “1.excellent, 2.good, 3.fair, 4.not so good or 5.poor”. In the analysis, the outcome was dichotomized:”1.excellent and 2.good, 3.fair” as “Good SROH”, and “4.not so good and 5.poor” as “Poor SROH”.

b. The chi-square test was performed to calculate the p-value.

STROBE 2007 (v4) Statement—Checklist of items that should be included in reports of *cross-sectional studies*

| Section/Topic                | Item # | Recommendation                                                                                                                                                                       | Reported on page # |
|------------------------------|--------|--------------------------------------------------------------------------------------------------------------------------------------------------------------------------------------|--------------------|
| Title and abstract           | 1      | (a) Indicate the study's design with a commonly used term in the title or the abstract                                                                                               | #1-2               |
|                              |        | (b) Provide in the abstract an informative and balanced summary of what was done and what was found                                                                                  | #2                 |
| <b>Introduction</b>          |        |                                                                                                                                                                                      |                    |
| Background/rationale         | 2      | Explain the scientific background and rationale for the investigation being reported                                                                                                 | #4-5               |
| Objectives                   | 3      | State specific objectives, including any prespecified hypotheses                                                                                                                     | #5                 |
| <b>Methods</b>               |        |                                                                                                                                                                                      |                    |
| Study design                 | 4      | Present key elements of study design early in the paper                                                                                                                              | #5                 |
| Setting                      | 5      | Describe the setting, locations, and relevant dates, including periods of recruitment, exposure, follow-up, and data collection                                                      | #5-6               |
| Participants                 | 6      | (a) Give the eligibility criteria, and the sources and methods of selection of participants                                                                                          | #5-6               |
| Variables                    | 7      | Clearly define all outcomes, exposures, predictors, potential confounders, and effect modifiers. Give diagnostic criteria, if applicable                                             | #6-9               |
| Data sources/<br>measurement | 8*     | For each variable of interest, give sources of data and details of methods of assessment (measurement). Describe comparability of assessment methods if there is more than one group | #6-9               |
| Bias                         | 9      | Describe any efforts to address potential sources of bias                                                                                                                            | #6                 |
| Study size                   | 10     | Explain how the study size was arrived at                                                                                                                                            | #6                 |
| Quantitative variables       | 11     | Explain how quantitative variables were handled in the analyses. If applicable, describe which groupings were chosen and why                                                         | #6-9               |
| Statistical methods          | 12     | (a) Describe all statistical methods, including those used to control for confounding                                                                                                | #8-9               |
|                              |        | (b) Describe any methods used to examine subgroups and interactions                                                                                                                  | #9                 |
|                              |        | (c) Explain how missing data were addressed                                                                                                                                          | #9                 |
|                              |        | (d) If applicable, describe analytical methods taking account of sampling strategy                                                                                                   | not applicable     |
|                              |        | (e) Describe any sensitivity analyses                                                                                                                                                | not applicable     |
| <b>Results</b>               |        |                                                                                                                                                                                      |                    |

|                          |     |                                                                                                                                                                                                              |                |
|--------------------------|-----|--------------------------------------------------------------------------------------------------------------------------------------------------------------------------------------------------------------|----------------|
| Participants             | 13* | (a) Report numbers of individuals at each stage of study—eg numbers potentially eligible, examined for eligibility, confirmed eligible, included in the study, completing follow-up, and analysed            | #9             |
|                          |     | (b) Give reasons for non-participation at each stage                                                                                                                                                         | #9             |
|                          |     | (c) Consider use of a flow diagram                                                                                                                                                                           | not applicable |
| Descriptive data         | 14* | (a) Give characteristics of study participants (eg demographic, clinical, social) and information on exposures and potential confounders                                                                     | #9             |
|                          |     | (b) Indicate number of participants with missing data for each variable of interest                                                                                                                          | #9             |
| Outcome data             | 15* | Report numbers of outcome events or summary measures                                                                                                                                                         | #9             |
| Main results             | 16  | (a) Give unadjusted estimates and, if applicable, confounder-adjusted estimates and their precision (eg, 95% confidence interval). Make clear which confounders were adjusted for and why they were included | #10            |
|                          |     | (b) Report category boundaries when continuous variables were categorized                                                                                                                                    | not applicable |
|                          |     | (c) If relevant, consider translating estimates of relative risk into absolute risk for a meaningful time period                                                                                             | not applicable |
| Other analyses           | 17  | Report other analyses done—eg analyses of subgroups and interactions, and sensitivity analyses                                                                                                               | #11            |
| <b>Discussion</b>        |     |                                                                                                                                                                                                              |                |
| Key results              | 18  | Summarise key results with reference to study objectives                                                                                                                                                     | #11            |
| Limitations              | 19  | Discuss limitations of the study, taking into account sources of potential bias or imprecision. Discuss both direction and magnitude of any potential bias                                                   | #14-15         |
| Interpretation           | 20  | Give a cautious overall interpretation of results considering objectives, limitations, multiplicity of analyses, results from similar studies, and other relevant evidence                                   | #14-15         |
| Generalisability         | 21  | Discuss the generalisability (external validity) of the study results                                                                                                                                        | #14-15         |
| <b>Other information</b> |     |                                                                                                                                                                                                              |                |
| Funding                  | 22  | Give the source of funding and the role of the funders for the present study and, if applicable, for the original study on which the present article is based                                                | #16            |

\*Give information separately for cases and controls in case-control studies and, if applicable, for exposed and unexposed groups in cohort and cross-sectional studies.

**Note:** An Explanation and Elaboration article discusses each checklist item and gives methodological background and published examples of transparent reporting. The STROBE checklist is best used in conjunction with this article (freely available on the Web sites of PLoS Medicine at <http://www.plosmedicine.org/>, Annals of Internal Medicine at <http://www.annals.org/>, and Epidemiology at <http://www.epidem.com/>). Information on the STROBE Initiative is available at [www.strobe-statement.org](http://www.strobe-statement.org).

# BMJ Open

## Early life-course socioeconomic position, adult work-related factors and oral health disparities: Cross-sectional analysis of the J-SHINE study.

|                                 |                                                                                                                                                                                                                                                                                                                                                                                                                                                                                                                   |
|---------------------------------|-------------------------------------------------------------------------------------------------------------------------------------------------------------------------------------------------------------------------------------------------------------------------------------------------------------------------------------------------------------------------------------------------------------------------------------------------------------------------------------------------------------------|
| Journal:                        | <i>BMJ Open</i>                                                                                                                                                                                                                                                                                                                                                                                                                                                                                                   |
| Manuscript ID:                  | bmjopen-2014-005701.R2                                                                                                                                                                                                                                                                                                                                                                                                                                                                                            |
| Article Type:                   | Research                                                                                                                                                                                                                                                                                                                                                                                                                                                                                                          |
| Date Submitted by the Author:   | 02-Sep-2014                                                                                                                                                                                                                                                                                                                                                                                                                                                                                                       |
| Complete List of Authors:       | Tsuboya, Toru; Harvard School of Public Health, Social and Behavioral Science; Tohoku university, School of Dentistry<br>Aida, Jun; Tohoku University Graduate School of Dentistry, Department of International and Community Oral Health<br>Kawachi, Ichiro; Harvard School of Public Health,<br>Katase, Kazuo; Tohoku Gakuin University, Department Human Science, Faculty of Liberal Arts<br>Osaka, Ken; Tohoku University Graduate School of Dentistry, Department of International and Community Oral Health |
| <b>Primary Subject Heading</b>: | Occupational and environmental medicine                                                                                                                                                                                                                                                                                                                                                                                                                                                                           |
| Secondary Subject Heading:      | Dentistry and oral medicine                                                                                                                                                                                                                                                                                                                                                                                                                                                                                       |
| Keywords:                       | OCCUPATIONAL & INDUSTRIAL MEDICINE, SOCIAL MEDICINE, PUBLIC HEALTH                                                                                                                                                                                                                                                                                                                                                                                                                                                |
|                                 |                                                                                                                                                                                                                                                                                                                                                                                                                                                                                                                   |

SCHOLARONE™  
Manuscripts

only

**Title:**

Early life-course socioeconomic position, adult work-related factors and oral health disparities: Cross-sectional analysis of the J-SHINE study.

**Corresponding author:**

Full name: Toru Tsuboya

Postal address: 75 Saint Alphonsus Street Apt. #311, Boston, MA, 02120

Email: tsubo828@gmail.com

Tel: +1-617-283-9677

**Authors:** Toru Tsuboya<sup>1,2</sup>, Jun Aida<sup>2</sup>, Ichiro Kawachi<sup>1</sup>, Kazuo Katase<sup>3</sup>, Ken Osaka<sup>2</sup>

1: Harvard School of Public Health, Department of Social and Behavioral Sciences, Boston, USA

2: Tohoku University Graduate School of Dentistry, Department of International and Community Oral Health, Sendai, Japan

3: Tohoku Gakuin University, Department Human Science, Sendai, Japan

1  
2  
3  
4  
5  
6  
7  
8  
9  
10  
11  
12  
13  
14  
15  
16  
17  
18  
19  
20  
21  
22  
23  
24  
25  
26  
27  
28  
29  
30  
31  
32  
33  
34  
35  
36  
37  
38  
39  
40  
41  
42  
43  
44  
45  
46  
47  
48  
49  
50  
51  
52  
53  
54  
55  
56  
57  
58  
59  
60

1 **Abstract**

2 Objectives: We investigated the association between socioeconomic position (SEP) and  
3 oral health, and examined the associations of economic difficulties in childhood and  
4 workplace-related factors on the association.

5 Design: Cross-sectional study

6 Participants: A total of 3,201 workers aged 25-50 years old, living in and around Tokyo,  
7 Japan, from the J-SHINE (Japanese study of Stratification, Health, Income, and  
8 Neighborhood) study. The response rate was 31.6%.

9 Outcome measures: Self-rated oral health (SROH). A logistic regression model was used  
10 to estimate odds ratios (ORs) for the association between poor SROH and each indicator  
11 of SEP (annual household income, wealth, educational attainment, occupation, and  
12 economic situation in childhood). Multiple imputation was used to address missing  
13 values.

14 Results: Each indicator of SEP, including childhood SEP, was significantly inversely  
15 associated with SROH, and all of the workplace-related factors (social support in the  
16 workplace, job stress, working hours, and type of employment) were also significantly  
17 associated with SROH. Compared with professionals, blue collar workers had  
18 significantly higher OR of poor SROH, and, the association was substantially explained  
19 by the workplace-related factors; ORs ranged from 1.44 in the age- and sex- adjusted  
20 model to 1.18 in the multivariate model. Poverty during childhood at age five and at age  
21 fifteen were associated with poorer SROH, and these two factors seemed to be  
22 independently associated with SROH

23 Conclusions: We found oral health disparity across SEP among workers in Japan.  
24 Approximately 60% of the association between occupation and SROH was explained by  
25 job-related factors. Economic difficulties during childhood appear to affect SROH in

1  
2  
3  
4  
5  
6  
7  
8  
9  
10  
11  
12  
13  
14  
15  
16  
17  
18  
19  
20  
21  
22  
23  
24  
25  
26  
27  
28  
29  
30  
31  
32  
33  
34  
35  
36  
37  
38  
39  
40  
41  
42  
43  
44  
45  
46  
47  
48  
49  
50  
51  
52  
53  
54  
55  
56  
57  
58  
59  
60

26 adulthood separately from sex, age, and the current workplace-related factors.

For peer review only



1  
2  
3  
4  
5  
6  
7  
8  
9  
10  
11  
12  
13  
14  
15  
16  
17  
18  
19  
20  
21  
22  
23  
24  
25  
26  
27 **Strengths and limitations of this study**

28 · Previous studies have shown an association between socioeconomic positions  
29 (SEP) in adulthood and oral health, however few have examined the relation between  
30 SEP in childhood and oral health in adulthood.

31 · Using cross-sectional data of 3,201 workers aged 25-50 years old in Japan, we  
32 found evidence that economic difficulties during childhood as well as SEP in adulthood  
33 independently appeared to affect self-rated oral health (SROH) in adulthood among  
34 working men and women.

35 · Workplace-related factors (social support in the workplace, job stress, working  
36 hours, and type of employment) substantially explained the association between  
37 occupation and SROH.

38 · The response rate was low, however, the obtained sample was properly  
39 equivalent with respect to age, sex, and education, compared with vital statistics in  
40 Census 2010 of the target population.

41  
42  
43

## 44 **Background**

45 Oral health problems, such as dental caries, periodontal disease, and  
46 edentulism, afflict more than half of the population of the planet (3.9 billion people) and  
47 untreated dental caries is the most prevalent condition (35% across all ages) among the  
48 291 conditions listed in the Global Burden of Disease 2010.<sup>1,2</sup> Using disability-adjusted  
49 life years (DALYs), which is an index of measuring disease burden in society, and is  
50 calculated as sum of years of life lost due to premature mortality and years lived with  
51 disability, Marcenes et al estimated that the global burden of oral conditions would  
52 increase by approximately 20% from 1990 to 2010.<sup>1,2</sup> In addition to their high  
53 prevalence, oral health conditions are a major contributor to socioeconomic disparities  
54 in health.<sup>3,4</sup>

55 Oral health reflects individuals' socioeconomic conditions as well as an  
56 important marker of future physical health conditions (e.g. cardiovascular disease).<sup>4-8</sup>  
57 The major indicators of socioeconomic positions (SEP) include income, wealth, education,  
58 and occupation.<sup>9</sup> SEP is associated not only with general health, but also with oral  
59 health. Some studies examined the associations between income/education and oral  
60 health; those who had higher income, or higher educational attainment had better oral  
61 health.<sup>10-14</sup> On the other hand, there are fewer studies on the association between  
62 occupational class and oral health. To our knowledge, only five previous studies  
63 examined the association between occupation and oral health.<sup>3, 15-18</sup> Poulton et al.  
64 examined the association of dental health (tooth cleanliness, gingival bleeding,  
65 periodontal disease and tooth decay) with combination of parental occupation in  
66 childhood with occupation in adulthood among 1,000 children in New Zealand; they  
67 reported significant social gradients among these oral conditions.<sup>3</sup> Sanders et al.  
68 examined data of 3,678 adults in Australia and reported that upper white collar

1  
2  
3  
4  
5  
6 69 workers reported less social impact, measured by the 14-item Oral Health Impact  
7  
8 70 Profile, than did workers in lower white-collar or blue-collar occupations.<sup>18</sup> Morita et al.  
9  
10 71 examined the association of occupations with oral conditions, based on approximately  
11  
12 72 16,000 Japanese workers; they reported that professionals had better oral conditions  
13  
14 73 than office workers and blue collar workers in Japan.<sup>15 16</sup> Tsakos et al. reported  
15  
16 74 significant social gradients in oral health, based on a sample of 6,600  
17  
18 75 community-dwelling English people aged 50 years and older.<sup>17</sup> However, none of these  
19  
20 76 considered workplace-related factors, such as social support, working hours, type of  
21  
22 77 employment or job stress, as potential mediators of the association between occupations  
23  
24 78 and oral health. Psychological stress is associated with the workplace-related factors as  
25  
26 79 well as occupations, and, on the other hand, oral diseases, such as periodontitis and  
27  
28 80 gingivitis, are also associated with psychological stress.<sup>19-22</sup> Therefore,  
29  
30 81 workplace-related factors may be candidates for mitigating oral health disparities. and,  
31  
32 82 we hypothesized that job stress (including work hours) – as well as stress-buffering  
33  
34 83 factors such as workplace social support – would mediate the association between  
35  
36 84 occupational class and oral health.

37  
38  
39 85 In this study, we first examined data of 3,201 workers aged 25-50 years old in  
40  
41 86 Japan to elucidate the associations between indicators of SEP (occupation, income  
42  
43 87 wealth, education and SEP in childhood) and oral health. We then examined the  
44  
45 88 mediation of socioeconomic disparities by workplace-related factors (social support in  
46  
47 89 workplace, job stress, working hours and type of employment).

50  
51

## 52 91 **METHODS**

### 53 92 **Participants**

54  
55  
56 93 We conducted the present study by using data from the J-SHINE (Japanese  
57  
58  
59  
60

1  
2  
3  
4  
5  
6 94 study of Stratification, Health, Income, and Neighborhood), the details of which have  
7  
8 95 been previously described.<sup>23</sup> In brief, between October 2010 and February 2011, 13,920  
9  
10 96 community-dwelling residents aged 25 to 50 years were probabilistically and randomly  
11  
12 97 selected from four municipalities in and around Tokyo, Japan, with using the Basic  
13  
14 98 Resident Registration System. Independent survey agencies were contracted to conduct  
15  
16 99 the surveys, and the professional surveyors who had more than three years of  
17  
18 100 experience in conducting interview-based social surveys made contacts with the eligible  
19  
20 101 individuals after attending training sessions to conduct the J-SHINE study. The main  
21  
22 102 reasons the surveyors were not able to receive responses from the eligible participants  
23  
24 103 were as follows: “inaccessible contact (n=4371)” and “refusal of invitation (n=3677)”. Of  
25  
26 104 those who were invited, 4,385 men and women responded (31.6%) to the invitation;  
27  
28 105 these individuals formed the baseline of the J-SHINE study. A questionnaire was  
29  
30 106 self-administered using a computer-assisted personal interview format, unless the  
31  
32 107 participants requested a face-to-face interview. We excluded participants who did not  
33  
34 108 answer the question about self-rated oral health, or who responded that they were not  
35  
36 109 active in the labor market (including homemakers and students); this result in 3,201  
37  
38 110 eligible participants.  
39  
40  
41  
42  
43

#### 44 112 Measurements

45  
46 113 All measures in this study were obtained by self-report. Basic demographic  
47  
48 114 variables included sex (men/women), age (categorized as 25-29, 30-34, 35-39, 40-44, and  
49  
50 115 45-50 years old), and marital status (categorized as married/not married). Self-rated  
51  
52 116 oral health (SROH) was used to evaluate oral conditions. SROH is a screening tool that  
53  
54 117 can evaluate needs of dental care among people, especially those who do not usually  
55  
56 118 visit dentists, and its validity and high internal consistency have been confirmed.<sup>24 25</sup>  
57  
58  
59  
60

1  
2  
3  
4  
5  
6 119 SROH was assessed by the following question. *“Overall, how would you rate the health*  
7  
8 *of your teeth and gums?”* Potential responses ranged from *“1.excellent, 2.good, 3.fair,*  
9  
10 *4.not so good or 5.poor”*. In the analysis, the outcome was dichotomized:”1.excellent and  
11  
12 122 2.good, 3.fair” as “Good SROH”, and “4.not so good and 5.poor” as “Poor SROH”.

13  
14 As indicators of SEP, we used annual household income, wealth, educational  
15  
16 124 attainment, occupation, and economic situations during childhood. Annual household  
17  
18 125 income was divided into tertiles; less than JPY 5 million (Approximately GBP 29,400),  
19  
20 126 JPY 5 to 7.5 million (GBP 29,400-44,100), or more than JPY 7.5 million (GBP 44,100).  
21  
22 127 Wealth was based on household financial and other assets (e.g. stock, bond, and so on)  
23  
24 128 and was divided into tertiles; less than JPY 3 million (GBP 17,600), JPY 3 to 5 million  
25  
26 129 (GBP 17,600-29,400), or more than JPY 5 million (GBP 29,400). Educational attainment  
27  
28 130 was divided into three categories; high school or less, vocational/junior college, and  
29  
30 131 university or more. Occupational class was divided into three categories; professionals,  
31  
32 132 office workers or blue collar workers. Occupations were self-reported, but, in addition, a  
33  
34 133 sociologist on the team (K.K.) examined each response to determine the correct  
35  
36 134 classification based on the detailed job description provided by the participants. Our  
37  
38 135 method of occupational classification was previously used in “The national survey of  
39  
40 136 Social Stratification and social Mobility”, which has been conducted in Japan every ten  
41  
42 137 years since 1955 and is regarded as the most valid classification of occupations in  
43  
44 138 Japan.<sup>26</sup> Economic conditions in childhood were evaluated through the following  
45  
46 139 questions. *“How would you rate the economic conditions in your household at age five?”*  
47  
48 140 and *“How would you rate the economic conditions in your household at age fifteen?”*The  
49  
50 141 answers were selected from *“1.very difficult, 2. difficult, 3.normal, 4. well off 5. very well*  
51  
52 142 *off”*. In the analysis, the answers were divided into three groups: “1.very difficult, 2.  
53  
54 143 difficult”, “3.normal” and “4. well off 5. very well off”. This question was derived from  
55  
56  
57  
58  
59  
60

1  
2  
3  
4  
5  
6 144 the Comprehensive Survey of Living Conditions, which is annually conducted by the  
7  
8 145 Ministry of Health, Labour, and Welfare, and is regarded as a standard way to evaluate  
9  
10 146 subjective economic situation in Japan.

11  
12  
13 147 With regard to workplace-related factors, job stress, social support in  
14  
15 148 workplace, working hours, and type of employment were used. Job stress was evaluated  
16  
17 149 by seven questions, which were taken from the Brief Job Stress Questionnaire (BJSQ).  
18  
19 150 BJSQ has been validated for use with Japanese workers, and consists of lists the 84  
20  
21 151 questions which assesses job stress, social support in workplace and subjective  
22  
23 152 physical/mental symptoms.<sup>27</sup> BJSQ has been used in workplaces in Japan and was used  
24  
25 153 in previous research in Japan.<sup>27 28</sup> One example of the seven questions on the job stress  
26  
27 154 was *"I have to deal with a lot of tasks"*, and the answer was chosen from *"1.yes, 2.rather*  
28  
29 155 *yes 3.rather no, 4.no"*. Aggregated scores for the seven questions were divided into  
30  
31 156 tertiles. Social support in workplace consisted of six questions, which were also taken  
32  
33 157 from BJSQ. One example of six questions was *"How reliable is your boss when you are*  
34  
35 158 *in trouble?"*, and the answer was chosen from *"1.very, 2.fairly 3.to some extent, 4.not"*.  
36  
37 159 Aggregated scores for the six questions were divided into tertiles. Working hours were  
38  
39 160 divided into four groups: less than 40 hours per week, 40 to 50 hours per week, 50 to 60  
40  
41 161 hours per week, or more than 60 hours per week. Type of employment was divided into  
42  
43 162 three groups: permanent, precarious or self-employment.  
44  
45  
46  
47

48 164 Statistical analysis

49  
50 165 Differences in background characteristics according to SROH (good or poor)  
51  
52 166 were compared using the chi-square test (Table1). We estimated logistic regression  
53  
54 167 models for the association between poor SROH and SEP. We computed sex- and age-  
55  
56 168 adjusted odds ratio (OR) and 95% confidence intervals (C.I.) for poor SROH among office  
57  
58  
59  
60

1  
2  
3  
4  
5  
6 169 workers and blue collar workers, compared with professionals. We also calculated the  
7  
8 170 ORs between each SEP and SROH (Table2), and the ORs between work-related factors  
9  
10 171 and SROH (Table3). Additionally, we estimated the multivariate ORs for the association  
11  
12 172 between occupations and SROH, adjusting for work-related factors, such as job stress  
13  
14 173 social support in workplace, working hours, and type of employment (Table4). With  
15  
16 174 regard to missing data on explanatory variables, we carried out 2 separate analyses. In  
17  
18 175 the first analysis, dummy variables were used for missing data, with creation of a  
19  
20 176 categorical indicator for missing responses (missing category) (Appendix Table1). In the  
21  
22 177 second analysis, we conducted multiple imputations for the missing data, included all  
23  
24 178 variables shown in Table1. Interactions between sex and the other variables  
25  
26 179 (age/marital status/job stress/social support in the workplace/working hour/type of  
27  
28 180 employment) were tested by entering multiplicative interaction terms into the  
29  
30 181 multivariate adjusted model, because employment situation in Japan is highly different  
31  
32 182 in men and women. SAS 9.3 (SAS Institute, Cary, NC) was used for all statistical  
33  
34 183 analyses, and “Proc MI” and “Proc MIANALYZE” were used for the multiple  
35  
36 184 imputations  
37  
38  
39

40 185

## 41 186 Ethics

42  
43 187 The study of J-SHINE was approved by the ethics committee of the Graduate School of  
44  
45 188 Medicine and Faculty of Medicine, The University of Tokyo. The data analyzed in this  
46  
47 189 study are de-identified data made available to researchers who are registered as  
48  
49 190 members of the J-SHINE research team  
50

51 191

## 52 192 Results

53  
54  
55  
56 193 The distribution of answers for the SROH was as follows; 1.excellent (N of 407),  
57  
58  
59  
60

1  
2  
3  
4  
5  
6 194 2.good (N of 772), 3.fair (N of 1155), 4.not so good (N of 738) and 5.poor (N of 129). Table  
7  
8 195 1 describes the basic characteristics of the study participants according to level of SROH.  
9  
10 196 All of the characteristics except marital status were significantly associated with SROH.  
11  
12 197 Poor SROH was more prevalent in men, older age-groups, blue collar workers,  
13  
14 198 precarious workers, as well as those with lower income, lower wealth, lower educational  
15  
16 199 attainment, higher childhood poverty, lower social support, higher stress and longer  
17  
18 200 working hours.

20 201 Table 2 shows the sex- and age- adjusted odds ratios and 95% CI for the  
21  
22 202 associations between various indicators of SEP (occupation, income, wealth, education,  
23  
24 203 and two indicators of childhood SEP) and poor SROH. All indicators of SEP were  
25  
26 204 inversely associated with SROH. The association with SROH was significant only for  
27  
28 205 the lowest levels in occupation, income and childhood SEP, while the association was  
29  
30 206 comparatively larger in magnitude and significant for the intermediate levels as well as  
31  
32 207 for the lowest levels in education and wealth. Blue collar workers had significantly  
33  
34 208 higher OR of poor SROH (1.44, 95% CI: 1.07-1.95). Educational attainment, current  
35  
36 209 income, wealth and SEP during childhood were also associated with poor SROH.

37  
38 210 Table 3 describes crude ORs and 95% CI for associations between  
39  
40 211 workplace-related factors (job stress, social support in workplace, working hour and  
41  
42 212 type of employment) and poor SROH. All of the factors were associated with poor SROH.  
43  
44 213 Workers with the most stress as well as low social support had higher odds of poor  
45  
46 214 SROH compared with those with less job stress or more social support. Those who  
47  
48 215 reported working more than 60 hours per week had poorer SROH than those who  
49  
50 216 worked 40-50 hours per week (OR: 1.69, 95%CI 1.20-2.39). Precarious workers had  
51  
52 217 higher OR for poor oral health (1.32, 95% CI: 1.11-1.57), compared with permanent  
53  
54 218 workers.



1  
2  
3  
4  
5  
6 219 Table 4 shows the multivariate ORs and 95% CI for poor SROH from the  
7  
8 220 multiple imputation models. The associations between occupational class and poor  
9  
10 221 SROH were substantially attenuated by work-related factors. Approximately 60% of the  
11  
12 222 association between occupations and poor SROH was explained by the work-related  
13  
14 223 factors.<sup>28</sup> In the multivariate model, all of the workplace-related factors (social support,  
15  
16 224 job stress, type of employment and working hours) were significantly associated with  
17  
18 225 poor SROH. Compared with the analysis that employed dummy categories for missing  
19  
20 226 values (Appendix Table1), we found similar results after accounting for missing values  
21  
22 227 using multiple imputations. None of the interactions were significant; occupation  
23  
24 228 (p=0.19), age (p=0.74), marital status (p=0.44), job stress (p=0.25), job support (p=0.50),  
25  
26 229 working hours (p=0.83), and type and employment (p=0.73).

27  
28  
29 230

### 30 31 231 **Discussion**

32  
33 232 In the present study, we found oral health disparity across various indicators of  
34  
35 233 SEP as well as childhood SEP among workers in Japan. Moreover, the association  
36  
37 234 between occupations and SROH was substantially explained by job-related factors. Our  
38  
39 235 finding is notable for demonstrating oral health disparities even in Japan. The  
40  
41 236 Japanese universal health coverage includes most of dental service as well as medical  
42  
43 237 services, and the citizens, including children and older adults, have access to dental  
44  
45 238 services with relatively low out-of-pocket cost. For most of adult patients, 70 % of dental  
46  
47 239 care payments are covered by the universal health care insurance. For people with 70 or  
48  
49 240 older, 80% of the payments are covered.<sup>29</sup> Besides, the copayments among children are  
50  
51 241 reimbursed in more than half of local governments, depending on their policies. Our  
52  
53 242 findings are consistent with a previous study by Morita et al., which reported that there  
54  
55 243 were significant oral health disparities across occupations.<sup>16</sup> We found oral health

1  
2  
3  
4  
5  
6 244 disparities across occupations as well as other indicators of SEP, including income,  
7  
8 245 wealth, and childhood SEP. Tsakos, et al. reported social gradients across occupation,  
9  
10 246 income, wealth and parental occupation, among older individuals in England.<sup>17</sup>  
11

12 247 One reason why people with higher SEP had better SROH may be related to  
13  
14 248 preventive practices – e.g. dental flossing or use of interdental brush (interproximal  
15  
16 249 brush). Neamatol et al. reported that students with doctorate or masters degrees flossed  
17  
18 250 more than those with bachelor degree or less<sup>30</sup>, while Tseveenjav et al. reported that  
19  
20 251 people with higher educational attainment performed cleaning more than the others.<sup>31</sup>  
21  
22 252 Another reason people in higher SEP had better SROH might be utilization of  
23  
24 253 preventive dentistry. People with lower incomes tend to use preventive dental service  
25  
26 254 less frequently<sup>32 33</sup>, and the difference of use in preventive service might explain the  
27  
28 255 social gradient of SROH. In fact, in the present study, approximately one in three  
29  
30 256 participants (32.3%) among the richest group made a preventive dental clinic visit in  
31  
32 257 the past year, whereas only one in four participants (24.7%) among the poorest group  
33  
34 258 did so. On the other hand, we did not observe a big difference among rich and poor  
35  
36 259 participants in the use of dental services for treatment; 42.3% for the richest group  
37  
38 260 versus 41.4% for the poorest group. Thus, the pathway from lower household income to  
39  
40 261 poor SROH might be through preventive dental service utilization.  
41  
42  
43

44 262 Another explanation for the relationship between SEP and SROH might be  
45  
46 263 through psychosocial factors. Baker et al reported that greater sense of coherence and  
47  
48 264 higher self-esteem were linked to better oral health perceptions.<sup>34</sup> Therefore, these  
49  
50 265 factors might be mediators between SEP and SROH because those who are in higher  
51  
52 266 SEP, including occupations, have, in general, higher self-esteem and sense of coherence.  
53

54 267 Our findings add to the previous literature by suggesting that occupational  
55  
56 268 inequalities in oral health can be substantially explained by work-based factors, such as,  
57  
58  
59  
60

1  
2  
3  
4  
5  
6 269 social support in the workplace, job stress, working hours, and type of employment  
7  
8 270 (precarious vs. permanent). These workplace-related factors might be targets for  
9  
10 271 interventions to mitigate oral health disparities, i.e. in addition to intervening to  
11  
12 272 improve socioeconomic conditions, it may be possible focus on working conditions to  
13  
14 273 reduce oral health disparities.

15  
16 274 Social support has been reported to have a “stress-buffering effect” on  
17  
18 275 cardiovascular diseases.<sup>35-37</sup> Stress has been reported as one of the exacerbating factors  
19  
20 276 for periodontitis or gingivitis. Hugo FN et al. reported that stress was a significant risk  
21  
22 277 factor for gingivitis<sup>21</sup>, and Krejci CB, et al. suggested that stress may hasten the  
23  
24 278 development and progression of periodontitis through the suppression of T-cell activity  
25  
26 279 or a reduction in salivary IgA.<sup>19 20</sup> Precarious employment was also significantly  
27  
28 280 associated with poor SROH in the multivariate model. Previous studies on precarious  
29  
30 281 employment showed that this form of work is associated with job insecurity and  
31  
32 282 psychological distress<sup>38 39</sup>, and, therefore, being in a precarious employment might also  
33  
34 283 a risk factor of developing periodontitis or gingivitis via stress. The number of  
35  
36 284 precarious employees has been increasing all over the world as well as in Japan. In  
37  
38 285 Japan 35.2% of total workers in 2012 were precarious workers, while only 16.4% were in  
39  
40 286 1985.<sup>40</sup>

41  
42  
43 287 Previous studies have suggested a consistent link between early life-course  
44  
45 288 socioeconomic circumstances and health status in adulthood.<sup>3 5 41 42</sup> Our study is  
46  
47 289 consistent with previous research in showing an association between childhood SEP and  
48  
49 290 oral health. Poulton R et al. examined 1,000 children in New Zealand and found that  
50  
51 291 there was a significant social gradient of dental health (tooth cleanliness, gingival  
52  
53 292 bleeding, periodontal disease, and tooth decay) across childhood SEP.<sup>3</sup> Thomson et al.  
54  
55 293 examined 789 individuals and revealed that those who were in low socioeconomic status  
56  
57  
58  
59  
60

1  
2  
3  
4  
5  
6 294 at age 5 years were more likely to have lost a tooth in adulthood because of caries and  
7  
8 295 had greater prevalence and extent of periodontitis.<sup>5</sup> In our study, when poverty during  
9  
10 296 the childhood at age five or fifteen was added to the multivariate model, both poverty  
11  
12 297 during childhood at age five and at age fifteen were associated with poorer SROH (OR:  
13  
14 298 1.60, 95%CI: 1.23-2.08 at age five, and OR: 1.47, 95%CI: 1.15-1.87 at age fifteen,  
15  
16 299 respectively, not shown in tables). These two factors seemed to be independently  
17  
18 300 associated with SROH, because coefficients of the other covariates in the multivariate  
19  
20 301 model hardly changed before and after adding the childhood poverty variables to the  
21  
22 302 multivariate model. Therefore, poverty during childhood appears to affect SROH in  
23  
24 303 adulthood separately from sex, age, and the current workplace-related factors. In Japan,  
25  
26 304 school children do receive oral checkups for free, however, they do not receive free dental  
27  
28 305 care. Therefore, economic difficulties during childhood might result in oral health  
29  
30 306 disparities during childhood, leading to oral health disparities during adults.  
31  
32  
33  
34

### 308 · Limitations

309 There are some limitations in this study. First, SROH is a subjective  
310 measurement. Some might argue that this type of measurement might be invalid,  
311 however, self-rated oral health has been examined and reported to be a well-validated  
312 and reliable index.<sup>24 25</sup> Jones JA et al. validated the association between a single-item  
313 self-report question and oral clinical examination among two hundred thirty-two  
314 community-dwelling participants. The question was “*How would you describe the*  
315 *health of your teeth and gums? Would you say it is excellent, very good, good, fair or*  
316 *poor?*” They reported that the single-item self-reported question had a sensitivity of 0.75  
317 and a specificity of 0.67 in identifying persons with severe need for denture care,  
318 compared with the clinical examination.<sup>24</sup> The validation studies were conducted in

1  
2  
3  
4  
5  
6 319 English, and the present study was conducted in Japanese. As far as we know, no  
7  
8 320 previous studies have validated the scale in Japanese yet. However, we have confirmed  
9  
10 321 that poor SROH was significantly associated with number of removed tooth in the  
11  
12 322 sample (Appendix Table2). Ando et al confirmed the validity of self-reported number of  
13  
14 323 remaining teeth and clinical examination in Japanese.<sup>43</sup> Therefore, this might support  
15  
16 324 that the scale in Japanese is also valid. Future studies are needed to clarify the validity  
17  
18 325 of the scale in Japanese. Secondly, the response rate was low. However, Takada et. al.  
19  
20 326 compared the collected sample with the vital statistics in Census 2010 of the target  
21  
22 327 population and reported that the obtained sample was properly equivalent with respect  
23  
24 328 to age, sex, and education.<sup>23</sup> Therefore, it is likely that the selection bias does not matter  
25  
26 329 in terms of age, sex and education. We are not able to discuss selection bias precisely  
27  
28 330 because we do not have other information among non-responders, such as smoking  
29  
30 331 habit, income and so on. Thirdly, the data used in this study was cross-sectional, not  
31  
32 332 longitudinal, therefore, we cannot infer causality. Thus, low SEP could cause worse oral  
33  
34 333 health; but the reverse is also possible, i.e. it is well described that poor dental status  
35  
36 334 can lead to social stigma and adversely impact people's chances of employment and  
37  
38 335 success in life.<sup>44</sup> Attention should be given to the positive association between current  
39  
40 336 poor SROH and economic disadvantage in childhood, because the assessments of  
41  
42 337 economic disadvantage in childhood were based on the participants' recall (recall bias).  
43  
44 338 Fourth, we did not gather data on brushing frequency or use of interdental brush/dental  
45  
46 339 flossing<sup>31</sup>, and we could not include these factors in the analysis. Some studies reported  
47  
48 340 that people with lower educational attainment or low income use interdental  
49  
50 341 brush/dental flossing less, and this might explain the association between SEPs and  
51  
52 342 poorer SROH. Finally, the 7 items for job stress and the 6 items for social support at  
53  
54 343 workplace were not validated. However, both have been used in practice in Japan, and  
55  
56  
57  
58  
59  
60

1  
2  
3  
4  
5  
6 344 the internal consistency of the scale in the present participants was acceptably high:  
7  
8 345 Cronbach's alpha coefficient was 0.90 for the 7 items for job stress, and 0.91 for the 6  
9  
10 346 items for social support. Future studies should employ well-validated questions on job  
11  
12 347 stress and social support.  
13

348

### 349 **Conclusion**

18 350 We found oral health disparities across various SEPs, and that work-related  
19  
20 351 factors could account for more than half the association between occupation and SROH .  
21  
22 352 Improving workplace environments may present a viable solution to reduce oral health  
23  
24 353 disparities. Future studies on the effect of workplace-related factors on oral health  
25  
26 354 should use longitudinal data to elucidate the causal association between the  
27  
28 355 workplace-related factors and oral health.  
29

30 356

31 357

32 358

33 359

34 360

35 361

36 362

37 363

38 364

39 365

40 366

41 367

42 368

1  
2  
3  
4  
5  
6 369

7  
8 370 **Acknowledgments**

9  
10 371 The authors thank Prof. Hideki Hashimoto, Prof. Norito Kawakami and their  
11  
12 372 team for providing us with data from the Japanese Study of Stratification, Health,  
13  
14 373 Income, and Neighborhood (J-SHINE). The authors also thank Dr. Akiomi Inoue and Dr.  
15  
16 374 Hiroshi Kanbayashi for his valuable advice.  
17

18 375

19  
20 376

21  
22 377 **Contributors:** TT, JA, IK, KK, and KO made substantial contribution to the concept and  
23  
24 378 design of the study. TT drafted the manuscript and JA, IK, KK, and KO revised it  
25  
26 379 critically for important intellectual content. TT, JA, IK, KK, and KO approved the final  
27  
28 380 version of the manuscript.  
29

30 381

31  
32  
33 382 **Competing interest:** None declared.  
34

35 383

36  
37 384 **Funding:** This work was supported by a Grant-in-Aid for Scientific Research on  
38  
39 385 Innovative Areas 2009-2013 (No. 21119002, No. 21119001 and 21119007) from the  
40  
41 386 Ministry of Education, Culture, Sports, Science and Technology, Japan. T Tsuboya is  
42  
43 387 supported by Grant-in-Aid for Epidemiological Research (St. Luke's Life Science  
44  
45 388 Institute). These sponsors were not involved in study design and the collection, analysis,  
46  
47 389 and interpretation of data and the writing of the article and the decision to submit it for  
48  
49 390 publication.  
50

51 391

52  
53  
54 392 **Data sharing:** No additional data are available.  
55

56 393  
57  
58  
59  
60

394

395

396 **REFERENCES**

- 397 1. Murray CJ, Vos T, Lozano R, et al. Disability-adjusted life years (DALYs) for 291 diseases  
398 and injuries in 21 regions, 1990-2010: a systematic analysis for the Global Burden of  
399 Disease Study 2010. *Lancet* 2012;**380**(9859):2197-223.
- 400 2. Marcenes W, Kassebaum NJ, Bernabe E, et al. Global burden of oral conditions in  
401 1990-2010: a systematic analysis. *Journal of dental research* 2013;**92**(7):592-7.
- 402 3. Poulton R, Caspi A, Milne BJ, et al. Association between children's experience of  
403 socioeconomic disadvantage and adult health: a life-course study. *Lancet*  
404 2002;**360**(9346):1640-5.
- 405 4. Sabbah W, Watt RG, Sheiham A, et al. Effects of allostatic load on the social gradient in  
406 ischaemic heart disease and periodontal disease: evidence from the Third National  
407 Health and Nutrition Examination Survey. *Journal of epidemiology and community*  
408 *health* 2008;**62**(5):415-20.
- 409 5. Thomson WM, Poulton R, Milne BJ, et al. Socioeconomic inequalities in oral health in  
410 childhood and adulthood in a birth cohort. *Community dentistry and oral*  
411 *epidemiology* 2004;**32**(5):345-53.
- 412 6. Sabbah W, Tsakos G, Sheiham A, et al. The role of health-related behaviors in the  
413 socioeconomic disparities in oral health. *Social science & medicine*  
414 2009;**68**(2):298-303.
- 415 7. Aida J, Kondo K, Yamamoto T, et al. Oral health and cancer, cardiovascular, and  
416 respiratory mortality of Japanese. *Journal of dental research* 2011;**90**(9):1129-35.
- 417 8. Polzer I, Schwahn C, Volzke H, et al. The association of tooth loss with all-cause and  
418 circulatory mortality. Is there a benefit of replaced teeth? A systematic review and



- 1  
2  
3  
4  
5  
6 419 meta-analysis. *Clinical oral investigations* 2012;**16**(2):333-51.
- 7  
8 420 9. Kawachi I, Berkman L. *Social Epidemiology*. 1st edition: Oxford University Press, USA,  
9  
10 421 2000.
- 11  
12 422 10. Drury TF, Garcia I, Adesanya M. Socioeconomic disparities in adult oral health in the  
13  
14 423 United States. *Annals of the New York Academy of Sciences* 1999;**896**:322-4.
- 15  
16 424 11. Astrom AN, Haugejorden O, Skaret E, et al. Oral Impacts on Daily Performance in  
17  
18 425 Norwegian adults: the influence of age, number of missing teeth, and  
19  
20 426 socio-demographic factors. *European journal of oral sciences* 2006;**114**(2):115-21.
- 21  
22 427 12. Lopez R, Fernandez O, Baelum V. Social gradients in periodontal diseases among  
23  
24 428 adolescents. *Community dentistry and oral epidemiology* 2006;**34**(3):184-96.
- 25  
26  
27 429 13. Sabbah W, Tsakos G, Chandola T, et al. Social gradients in oral and general health.  
28  
29 430 *Journal of dental research* 2007;**86**(10):992-6.
- 30  
31 431 14. Tsakos G, Sheiham A, Iliffe S, et al. The impact of educational level on oral  
32  
33 432 health-related quality of life in older people in London. *European journal of oral*  
34  
35 433 *sciences* 2009;**117**(3):286-92.
- 36  
37 434 15. Morita I, Nakagaki H, Yoshii S, et al. Gradients in periodontal status in Japanese  
38  
39 435 employed males. *Journal of clinical periodontology* 2007;**34**(11):952-6.
- 40  
41 436 16. Morita I, Nakagaki H, Yoshii S, et al. Is there a gradient by job classification in dental  
42  
43 437 status in Japanese men? *European journal of oral sciences* 2007;**115**(4):275-9.
- 44  
45 438 17. Tsakos G, Demakakos P, Breeze E, et al. Social gradients in oral health in older adults:  
46  
47 439 findings from the English longitudinal survey of aging. *American journal of public*  
48  
49 440 *health* 2011;**101**(10):1892-9.
- 50  
51  
52 441 18. Sanders AE, Spencer AJ. Social inequality in perceived oral health among adults in  
53  
54 442 Australia. *Australian and New Zealand journal of public health* 2004;**28**(2):159-66.
- 55  
56 443 19. Seymour GJ. Importance of the host response in the periodontium. *Journal of clinical*  
57  
58  
59  
60

- 1  
2  
3  
4  
5  
6 444 periodontology 1991;**18**(6):421-6.  
7  
8 445 20. Krejci CB, Bissada NF. Periodontitis--the risks for its development. General dentistry  
9  
10 446 2000;**48**(4):430-6; quiz 37-8.  
11  
12 447 21. Hugo FN, Hilgert JB, Bozzetti MC, et al. Chronic stress, depression, and cortisol levels  
13  
14 448 as risk indicators of elevated plaque and gingivitis levels in individuals aged 50  
15  
16 449 years and older. Journal of periodontology 2006;**77**(6):1008-14.  
17  
18 450 22. Doyle CJ, Bartold PM. How does stress influence periodontitis? Journal of the  
19  
20 451 International Academy of Periodontology 2012;**14**(2):42-9.  
21  
22 452 23. Takada M, Kondo N, Hashimoto H. Japanese study on stratification, health, income, and  
23  
24 453 neighborhood: study protocol and profiles of participants. Journal of epidemiology /  
25  
26 454 Japan Epidemiological Association 2014;**24**(4):334-44.  
27  
28 455 24. Jones JA, Spiro A, 3rd, Miller DR, et al. Need for dental care in older veterans:  
29  
30 456 assessment of patient-based measures. Journal of the American Geriatrics Society  
31  
32 457 2002;**50**(1):163-8.  
33  
34 458 25. Jones JA, Kressin NR, Miller DR, et al. Comparison of patient-based oral health outcome  
35  
36 459 measures. Quality of life research : an international journal of quality of life aspects  
37  
38 460 of treatment, care and rehabilitation 2004;**13**(5):975-85.  
39  
40 461 26. Grusky DB, Sato Y, Jan O, et al, Social Mobility in Japan: A New Approach to Modeling  
41  
42 462 Trend in Mobility 2008.  
43  
44 463 [http://www.stanford.edu/group/scspi/grusky/article\\_files/social\\_mobility\\_japan.pdf](http://www.stanford.edu/group/scspi/grusky/article_files/social_mobility_japan.pdf).  
45  
46 464 Accessed Apr. 15<sup>th</sup> 2014.  
47  
48 465 27. Inoue A, Kawakami N, Shimomitsu T, et al. Development of a short questionnaire to  
49  
50 466 measure an extended set of job demands, job resources, and positive health  
51  
52 467 outcomes: the new brief job stress questionnaire. Industrial health  
53  
54 468 2014;**52**(3):175-89.  
55  
56  
57  
58  
59  
60

- 1  
2  
3  
4  
5  
6 469 28. Kato S, Doi Y, Tsutsui S, et al. [Job stress among Japan Overseas Cooperation  
7  
8 470 volunteers--using the Brief Job Stress Questionnaire]. *Sangyo eiseigaku zasshi =*  
9  
10 471 *Journal of occupational health* 2004;**46**(6):191-200.
- 11  
12 472 29. Ikegami N, Yoo BK, Hashimoto H, et al. Japanese universal health coverage: evolution,  
13  
14 473 achievements, and challenges. *Lancet* 2011;**378**(9796):1106-15.
- 15  
16 474 30. Neamatollahi H, Ebrahimi M. Oral health behavior and its determinants in a group of  
17  
18 475 Iranian students. *Indian journal of dental research : official publication of Indian*  
19  
20 476 *Society for Dental Research* 2010;**21**(1):84-8.
- 21  
22 477 31. Tseveenjav B, Suominen-Taipale L, Varsio S, et al. Patterns of oral cleaning habits and  
23  
24 478 use of fluoride among dentate adults in Finland. *Oral health & preventive dentistry*  
25  
26 479 2010;**8**(3):287-94.
- 27  
28  
29 480 32. Pizarro V, Ferrer M, Domingo-Salvany A, et al. The utilization of dental care services  
30  
31 481 according to health insurance coverage in Catalonia (Spain). *Community dentistry*  
32  
33 482 *and oral epidemiology* 2009;**37**(1):78-84.
- 34  
35 483 33. Chi DL, Rossitch KC, Beeles EM. Developmental delays and dental caries in low-income  
36  
37 484 preschoolers in the USA: a pilot cross-sectional study and preliminary explanatory  
38  
39 485 model. *BMC oral health* 2013;**13**:53.
- 40  
41 486 34. Baker SR, Mat A, Robinson PG. What psychosocial factors influence adolescents' oral  
42  
43 487 health? *Journal of dental research* 2010;**89**(11):1230-5.
- 44  
45 488 35. Gerin W, Milner D, Chawla S, et al. Social support as a moderator of cardiovascular  
46  
47 489 reactivity in women: a test of the direct effects and buffering hypotheses.  
48  
49 490 *Psychosomatic medicine* 1995;**57**(1):16-22.
- 50  
51 491 36. Uchino BN, Cacioppo JT, Kiecolt-Glaser JK. The relationship between social support and  
52  
53 492 physiological processes: a review with emphasis on underlying mechanisms and  
54  
55 493 implications for health. *Psychological bulletin* 1996;**119**(3):488-531.

- 1  
2  
3  
4  
5  
6 494 37. Uchino BN. Social support and health: a review of physiological processes potentially  
7  
8 495 underlying links to disease outcomes. *Journal of behavioral medicine*  
9  
10 496 2006;**29**(4):377-87.
- 11  
12 497 38. Tsurugano S, Inoue M, Yano E. Precarious employment and health: analysis of the  
13  
14 498 Comprehensive National Survey in Japan. *Industrial health* 2012;**50**(3):223-35.
- 15  
16 499 39. Vives A, Amable M, Ferrer M, et al. Employment precariousness and poor mental health:  
17  
18 500 evidence from Spain on a new social determinant of health. *Journal of*  
19  
20 501 *environmental and public health* 2013;**2013**:978656.
- 21  
22 502 40. Ministry of Health , Labour and Welware. Current situation on precarious workers (in  
23  
24 503 Japanese).  
25  
26  
27 504 [http://www.mhlw.go.jp/seisakunitsuite/bunya/koyou\\_roudou/part\\_haken/genjou/](http://www.mhlw.go.jp/seisakunitsuite/bunya/koyou_roudou/part_haken/genjou/)  
28  
29 505 Accessed Apr. 15<sup>th</sup> 2014.
- 30  
31 506 41. Lynch JW, Kaplan GA, Cohen RD, et al. Childhood and adult socioeconomic status as  
32  
33 507 predictors of mortality in Finland. *Lancet* 1994;**343**(8896):524-7.
- 34  
35 508 42. Black RE, Victora CG, Walker SP, et al. Maternal and child undernutrition and  
36  
37 509 overweight in low-income and middle-income countries. *Lancet*  
38  
39 510 2013;**382**(9890):427-51.
- 40  
41 511 43. Ando Y, Ikeda S, Yoshihara A. The reliability of self-assessment of number of remaining  
42  
43 512 teeth using questionnaires. *Journal of Dental Health* 1997(47):657-62.
- 44  
45 513 44. Horton S, Barker JC. Stigmatized biologies: Examining the cumulative effects of oral  
46  
47 514 health disparities for Mexican American farmworker children. *Medical anthropology*  
48  
49 515 *quarterly* 2010;**24**(2):199-219.
- 50  
51  
52 516  
53  
54 517  
55  
56 518  
57  
58  
59  
60

1  
2  
3  
4  
5  
6 519  
7  
8 520  
9  
10  
11  
12  
13  
14  
15  
16  
17  
18  
19  
20  
21  
22  
23  
24  
25  
26  
27  
28  
29  
30  
31  
32  
33  
34  
35  
36  
37  
38  
39  
40  
41  
42  
43  
44  
45  
46  
47  
48  
49  
50  
51  
52  
53  
54  
55  
56  
57  
58  
59  
60

For peer review only

Table 1. Characteristics of participants by status of self-rated oral health (SROH) among 3,201 men and women aged 25-50 years old in Japan during 2010-2011

| Characteristic                                                     | Poor SROH <sup>a</sup> |        | <i>p-value</i> <sup>b</sup> |
|--------------------------------------------------------------------|------------------------|--------|-----------------------------|
|                                                                    | n                      | (%)    |                             |
| Sex                                                                |                        |        |                             |
| Men                                                                | 529                    | (29.7) | 0.0002                      |
| Women                                                              | 334                    | (23.8) |                             |
| Age                                                                |                        |        |                             |
| 25-29                                                              | 132                    | (22.5) | 0.0001                      |
| 30-34                                                              | 138                    | (25.0) |                             |
| 35-39                                                              | 173                    | (27.2) |                             |
| 40-44                                                              | 175                    | (25.8) |                             |
| 45-50                                                              | 225                    | (33.8) |                             |
| Marital status                                                     |                        |        |                             |
| Married                                                            | 597                    | (27.9) | 0.14                        |
| Not married <sup>c</sup>                                           | 269                    | (25.5) |                             |
| Occupations                                                        |                        |        |                             |
| Specialists                                                        | 83                     | (28.0) | 0.0009                      |
| White collar workers                                               | 497                    | (24.9) |                             |
| Blue collar workers                                                | 287                    | (31.5) |                             |
| Annual household income                                            |                        |        |                             |
| Less than 5 million JPY (Approximately GBP 29,400) <sup>d</sup>    | 226                    | (32.3) | 0.0012                      |
| 5-7.5 million JPY (Approximately GBP 29,400-44,100) <sup>d</sup>   | 179                    | (26.6) |                             |
| More than 7.5 mil JPY (Approximately GBP 44,100) <sup>d</sup>      | 250                    | (24.3) |                             |
| Wealth (Household financial and other assets)                      |                        |        |                             |
| Less than 3 million JPY (Approximately GBP 17,600) <sup>d</sup>    | 201                    | (34.7) | <.0001                      |
| 3-5 million JPY (Approximately GBP 17,600-29,400) <sup>d</sup>     | 169                    | (30.2) |                             |
| More than 5 million JPY (Approximately GBP 29,400) <sup>d</sup>    | 173                    | (22.9) |                             |
| Education                                                          |                        |        |                             |
| High school or less                                                | 263                    | (36.3) | <.0001                      |
| Vocational/junior college                                          | 262                    | (26.9) |                             |
| University or more                                                 | 333                    | (22.7) |                             |
| Economic situation at home when respondents were five years old    |                        |        |                             |
| Poor, very poor                                                    | 226                    | (34.8) | <.0001                      |
| Normal                                                             | 502                    | (25.7) |                             |
| Well-off, very well-off                                            | 133                    | (23.5) |                             |
| Economic situation at home when respondents were fifteen years old |                        |        |                             |
| Poor, very poor                                                    | 216                    | (35.9) | <.0001                      |
| Normal                                                             | 467                    | (24.8) |                             |
| Well-off, very well-off                                            | 180                    | (25.9) |                             |

|    |                               |     |        |        |
|----|-------------------------------|-----|--------|--------|
| 1  | Job stress                    |     |        |        |
| 2  | 1st tertile(least stressful)  | 289 | (25.2) |        |
| 3  | 2nd tertile                   | 272 | (25.2) | 0.0017 |
| 4  | 3rd tertile(most stressful)   | 300 | (31.3) |        |
| 5  | Social support in workplace   |     |        |        |
| 6  | 1st tertile(most supportive)  | 266 | (23.4) |        |
| 7  | 2nd tertile                   | 278 | (29.1) | 0.0014 |
| 8  | 3rd tertile(least supportive) | 295 | (29.8) |        |
| 9  | Working hours per week        |     |        |        |
| 10 | <40                           | 360 | (26.7) |        |
| 11 | 40-50                         | 162 | (23.5) |        |
| 12 | 50-60                         | 81  | (26.3) | 0.027  |
| 13 | >60                           | 67  | (34.2) |        |
| 14 | Type of employment            |     |        |        |
| 15 | Permanent                     | 526 | (25.3) |        |
| 16 | Precarious                    | 272 | (30.9) | 0.0083 |
| 17 | Self-employed                 | 66  | (27.3) |        |

<sup>a</sup> The status of SROH was determined by the question: "Overall, how would you rate the health of your teeth and gums?". "Poor SROH" includes respondents of "not so good" and "poor", and "Good SROH" includes respondents of "excellent", "good" and "fair"

<sup>b</sup> P-value was calculated by chi-squared test.

<sup>c</sup> Divorced/separated and widow people were classified into "not married".

<sup>d</sup> Income and wealth were converted at 170 JPY (Japanese Yen) to 1 GBP (Great Britain Pound).

Table 2. Age- and sex- adjusted odds ratios and 95% confidence intervals for associations between socioeconomic positions and poor self-rated oral health among 3,201 men and women aged 25-50 years old in Japan during 2010-2011.

| Independent variable                                                      | odds ratio | 95% confidence interval | <i>p</i> -value |
|---------------------------------------------------------------------------|------------|-------------------------|-----------------|
| <b>Occupations</b>                                                        |            |                         |                 |
| Professionals                                                             | 1.00       |                         |                 |
| Office workers                                                            | 1.05       | ( 0.79 - 1.39 )         | 0.75            |
| Blue collar workers                                                       | 1.44       | ( 1.07 - 1.95 )         | 0.017           |
| <b>Household income</b>                                                   |            |                         |                 |
| Lowest tertile                                                            | 1.72       | ( 1.38 - 2.16 )         | <.0001          |
| Second tertile                                                            | 1.18       | ( 0.94 - 1.48 )         | 0.15            |
| Highest tertile (richest)                                                 | 1.00       |                         |                 |
| <b>Wealth (Household financial and other assets)</b>                      |            |                         |                 |
| Lowest tertile                                                            | 1.93       | ( 1.51 - 2.46 )         | <.0001          |
| Second tertile                                                            | 1.55       | ( 1.20 - 1.99 )         | 0.0007          |
| Highest tertile (richest)                                                 | 1.00       |                         |                 |
| <b>Educational attainment</b>                                             |            |                         |                 |
| High school or less                                                       | 1.98       | ( 1.63 - 2.42 )         | <.0001          |
| Vocational/junior college                                                 | 1.38       | ( 1.14 - 1.68 )         | 0.0012          |
| University or more                                                        | 1.00       |                         |                 |
| <b>Economic situation at home when respondents were five years old</b>    |            |                         |                 |
| Poor, very poor                                                           | 1.61       | ( 1.25 - 2.08 )         | 0.0003          |
| Normal                                                                    | 1.07       | ( 0.86 - 1.34 )         | 0.55            |
| Well-off, very well-off                                                   | 1.00       |                         |                 |
| <b>Economic situation at home when respondents were fifteen years old</b> |            |                         |                 |
| Poor, very poor                                                           | 1.53       | ( 1.20 - 1.95 )         | 0.0006          |
| Normal                                                                    | 0.91       | ( 0.74 - 1.11 )         | 0.33            |
| Well-off, very well-off                                                   | 1.00       |                         |                 |

SROH was assessed by the following question. "Overall, how would you rate the health of your teeth and gums?" Potential responses ranged from "1.excellent, 2.good, 3.fair, 4.not so good or 5.poor". In the analysis, the outcome was dichotomized: "1.excellent and 2.good, 3.fair" as "Good SROH", and "4.not so good and 5.poor" as "Poor SROH".



Table 3. Crude odds ratios and 95% confidence intervals for associations between workplace-related factors and poor self-rated oral health among 3,201 men and women aged 25-50 years old in Japan during 2010-2011.

| Independent variable          | odds ratio | 95% confidence interval | <i>p</i> -value |
|-------------------------------|------------|-------------------------|-----------------|
| Job stress                    |            |                         |                 |
| 1st tertile(least stressful)  | 1.00       |                         |                 |
| 2nd tertile                   | 1.00       | ( 0.83 - 1.21 )         | 0.99            |
| 3rd tertile(most stressful)   | 1.36       | ( 1.12 - 1.64 )         | 0.0018          |
| Social support in workplace   |            |                         |                 |
| 1st tertile(most supportive)  | 1.00       |                         |                 |
| 2nd tertile                   | 1.34       | ( 1.10 - 1.63 )         | 0.0033          |
| 3rd tertile(least supportive) | 1.39       | ( 1.14 - 1.68 )         | 0.001           |
| Working hours per week        |            |                         |                 |
| <40                           | 1.19       | ( 0.96 - 1.47 )         | 0.12            |
| 40-50                         | 1.00       |                         |                 |
| 50-60                         | 1.16       | ( 0.85 - 1.58 )         | 0.34            |
| >60                           | 1.69       | ( 1.20 - 2.39 )         | 0.0027          |
| Type of employment            |            |                         |                 |
| Permanent                     | 1.00       |                         |                 |
| Precarious                    | 1.32       | ( 1.11 - 1.57 )         | 0.002           |
| Self-employed                 | 1.10       | ( 0.82 - 1.49 )         | 0.52            |

SROH was assessed by the following question. "Overall, how would you rate the health of your teeth and gums?" Potential responses ranged from "1.excellent, 2.good, 3.fair, 4.not so good or 5.poor". In the analysis, the outcome was dichotomized:"1.excellent and 2.good, 3.fair" as "Good SROH", and "4.not so good and 5.poor" as "Poor SROH".

Table 4. Multivariate odds ratios and 95% confidence intervals from multiple imputation analysis for associations with poor self-rated oral health among 3,201 men and women aged 25-50 years old in Japan during 2010-2011

| Independent variable               | odds ratio | 95% confidence interval | <i>p</i> -value |
|------------------------------------|------------|-------------------------|-----------------|
| <b>Occupations</b>                 |            |                         |                 |
| Professionals                      | 1.00       |                         |                 |
| Office workers                     | 0.97       | ( 0.73 - 1.29 )         | 0.82            |
| Blue collar workers                | 1.18       | ( 0.86 - 1.61 )         | 0.29            |
| <b>Sex</b>                         |            |                         |                 |
| Men                                | 1.61       | ( 1.33 - 1.96 )         | <.0001          |
| Women                              | 1.00       |                         |                 |
| <b>Age</b>                         |            |                         |                 |
| 25-29                              | 0.88       | ( 0.66 - 1.16 )         | 0.36            |
| 30-34                              | 1.00       |                         |                 |
| 35-39                              | 1.10       | ( 0.85 - 1.44 )         | 0.45            |
| 40-44                              | 0.99       | ( 0.76 - 1.30 )         | 0.96            |
| 45-50                              | 1.49       | ( 1.14 - 1.93 )         | 0.0033          |
| <b>Marital status</b>              |            |                         |                 |
| Married                            | 1.00       |                         |                 |
| Not married <sup>b</sup>           | 1.01       | ( 0.84 - 1.22 )         | 0.89            |
| <b>Job stress</b>                  |            |                         |                 |
| 1st tertile(least stressful)       | 1.00       |                         |                 |
| 2nd tertile                        | 0.96       | ( 0.79 - 1.17 )         | 0.71            |
| 3rd tertile(most stressful)        | 1.26       | ( 1.03 - 1.54 )         | 0.025           |
| <b>Social support in workplace</b> |            |                         |                 |
| 1st tertile(most supportive)       | 1.00       |                         |                 |
| 2nd tertile                        | 1.25       | ( 1.02 - 1.52 )         | 0.029           |
| 3rd tertile(least supportive)      | 1.23       | ( 1.01 - 1.5 )          | 0.042           |
| <b>Working hours per week</b>      |            |                         |                 |
| <40                                | 1.12       | ( 0.88 - 1.43 )         | 0.35            |
| 40-50                              | 1.00       |                         |                 |
| 50-60                              | 1.06       | ( 0.72 - 1.57 )         | 0.75            |
| >60                                | 1.41       | ( 0.99 - 2.01 )         | 0.06            |
| <b>Type of employment</b>          |            |                         |                 |
| Permanent                          | 1.00       |                         |                 |
| Precarious                         | 1.57       | ( 1.26 - 1.96 )         | <.0001          |
| Self-employed                      | 1.12       | ( 0.82 - 1.53 )         | 0.49            |

1  
2  
3  
4  
5 a. SROH was assessed by the following question. "Overall, how would you rate the health of your  
6 teeth and gums?" Potential responses ranged from "1.excellent, 2.good, 3.fair, 4.not so good or  
7 5.poor". In the analysis, the outcome was dichotomized:"1.excellent and 2.good, 3.fair" as "Good  
8 SROH", and "4.not so good and 5.poor" as "Poor SROH".  
9

10  
11  
12 b. Divorced/separated and widow people were classified into "not married".  
13  
14  
15  
16  
17  
18  
19  
20  
21  
22  
23  
24  
25  
26  
27  
28  
29  
30  
31  
32  
33  
34  
35  
36  
37  
38  
39  
40  
41  
42  
43  
44  
45  
46  
47  
48  
49  
50  
51  
52  
53  
54  
55  
56  
57  
58  
59  
60

For peer review only

1  
2  
3  
4  
5  
6  
7  
8  
9  
10  
11  
12  
13  
14  
15  
16  
17  
18  
19  
20  
21  
22  
23  
24  
25  
26  
27  
28  
29  
30  
31  
32  
33  
34  
35  
36  
37  
38  
39  
40  
41  
42  
43  
44  
45  
46  
47  
48  
49  
50  
51  
52  
53  
54  
55  
56  
57  
58  
59  
60

For peer review only

**Title:**

Early life-course socioeconomic position, adult work-related factors and oral health disparities: Cross-sectional analysis of the J-SHINE study.

**Corresponding author:**

Full name: Toru Tsuboya

Postal address: 75 Saint Alphonsus Street Apt. #311, Boston, MA, 02120

Email: tsubo828@gmail.com

Tel: +1-617-283-9677

**Authors:** Toru Tsuboya<sup>1,2</sup>, Jun Aida<sup>2</sup>, Ichiro Kawachi<sup>1</sup>, Kazuo Katase<sup>3</sup>, Ken Osaka<sup>2</sup>

1: Harvard School of Public Health, Department of Social and Behavioral Sciences, Boston, USA

2: Tohoku University Graduate School of Dentistry, Department of International and Community Oral Health, Sendai, Japan

3: Tohoku Gakuin University, Department Human Science, Sendai, Japan

1  
2  
3  
4  
5  
6  
7  
8  
9  
10  
11  
12  
13  
14  
15  
16  
17  
18  
19  
20  
21  
22  
23  
24  
25  
26  
27  
28  
29  
30  
31  
32  
33  
34  
35  
36  
37  
38  
39  
40  
41  
42  
43  
44  
45  
46  
47  
48  
49  
50  
51  
52  
53  
54  
55  
56  
57  
58  
59  
60

1   **Abstract**

2   Objectives: We investigated the association between socioeconomic position (SEP) and  
3   oral health, and examined the associations of economic difficulties in childhood and  
4   workplace-related factors on the association.

5   Design: Cross-sectional study

6   Participants: A total of 3,201 workers aged 25-50 years old, living in and around Tokyo,  
7   Japan, from the J-SHINE (Japanese study of Stratification, Health, Income, and  
8   Neighborhood) study. The response rate was 31.6%.

9   Outcome measures: Self-rated oral health (SROH). A logistic regression model was used  
10   to estimate odds ratios (ORs) for the association between poor SROH and each indicator  
11   of SEP (annual household income, wealth, educational attainment, occupation, and  
12   economic situation in childhood). Multiple imputation was used to address missing  
13   values.

14   Results: Each indicator of SEP, including childhood SEP, was significantly inversely  
15   associated with SROH, and all of the workplace-related factors (social support in the  
16   workplace, job stress, working hours, and type of employment) were also significantly  
17   associated with SROH. Compared with professionals, blue collar workers had  
18   significantly higher OR of poor SROH, and, the association was substantially explained  
19   by the workplace-related factors; ORs ranged from 1.44 in the age- and sex- adjusted  
20   model to 1.18 in the multivariate model. Poverty during childhood at age five and at age  
21   fifteen were associated with poorer SROH, and these two factors seemed to be  
22   independently associated with SROH

23   Conclusions: We found oral health disparity across SEP among workers in Japan.  
24   Approximately 60% of the association between occupation and SROH was explained by  
25   job-related factors. Economic difficulties during childhood appear to affect SROH in

1  
2  
3  
4  
5  
6 26 adulthood separately from sex, age, and the current workplace-related factors.  
7  
8  
9  
10  
11  
12  
13  
14  
15  
16  
17  
18  
19  
20  
21  
22  
23  
24  
25  
26  
27  
28  
29  
30  
31  
32  
33  
34  
35  
36  
37  
38  
39  
40  
41  
42  
43  
44  
45  
46  
47  
48  
49  
50  
51  
52  
53  
54  
55  
56  
57  
58  
59  
60

For peer review only

1  
2  
3  
4  
5  
6 27 **Strengths and limitations of this study**  
7

8 · Previous studies have shown an association between socioeconomic positions  
9  
10 (SEP) in adulthood and oral health, however few have examined the relation between  
11  
12 SEP in childhood and oral health in adulthood.  
13

14 · Using cross-sectional data of 3,201 workers aged 25-50 years old in Japan, we  
15  
16 found evidence that economic difficulties during childhood as well as SEP in adulthood  
17  
18 independently appeared to affect self-rated oral health (SROH) in adulthood among  
19  
20 working men and women.  
21

22 · Workplace-related factors (social support in the workplace, job stress, working  
23  
24 hours, and type of employment) substantially explained the association between  
25  
26 occupation and SROH.  
27

28 · The response rate was low, however, the obtained sample was properly  
29  
30 equivalent with respect to age, sex, and education, compared with vital statistics in  
31  
32 Census 2010 of the target population.  
33  
34

35 41  
36  
37 42  
38  
39 43  
40  
41  
42  
43  
44  
45  
46  
47  
48  
49  
50  
51  
52  
53  
54  
55  
56  
57  
58  
59  
60



## 44 **Background**

45 Oral health problems, such as dental caries, periodontal disease, and  
46 edentulism, afflict more than half of the population of the planet (3.9 billion people) and  
47 untreated dental caries is the most prevalent condition (35% across all ages) among the  
48 291 conditions listed in the Global Burden of Disease 2010.<sup>1,2</sup> Using disability-adjusted  
49 life years (DALYs), which is an index of measuring disease burden in society, and is  
50 calculated as sum of years of life lost due to premature mortality and years lived with  
51 disability, Marcenes et al estimated that the global burden of oral conditions would  
52 increase by approximately 20% from 1990 to 2010.<sup>1,2</sup> In addition to their high  
53 prevalence, oral health conditions are a major contributor to socioeconomic disparities  
54 in health.<sup>3,4</sup>

55 Oral health reflects individuals' socioeconomic conditions as well as an  
56 important marker of future physical health conditions (e.g. cardiovascular disease).<sup>4-8</sup>  
57 The major indicators of socioeconomic positions (SEP) include income, wealth, education,  
58 and occupation.<sup>9</sup> SEP is associated not only with general health, but also with oral  
59 health. Some studies examined the associations between income/education and oral  
60 health; those who had higher income, or higher educational attainment had better oral  
61 health.<sup>10-14</sup> On the other hand, there are fewer studies on the association between  
62 occupational class and oral health. To our knowledge, only five previous studies  
63 examined the association between occupation and oral health.<sup>3, 15-18</sup> Poulton et al.  
64 examined the association of dental health (tooth cleanliness, gingival bleeding,  
65 periodontal disease and tooth decay) with combination of parental occupation in  
66 childhood with occupation in adulthood among 1,000 children in New Zealand; they  
67 reported significant social gradients among these oral conditions.<sup>3</sup> Sanders et al.  
68 examined data of 3,678 adults in Australia and reported that upper white collar

1  
2  
3  
4  
5  
6 69 workers reported less social impact, measured by the 14-item Oral Health Impact  
7  
8 70 Profile, than did workers in lower white-collar or blue-collar occupations.<sup>18</sup> Morita et al.  
9  
10 71 examined the association of occupations with oral conditions, based on approximately  
11  
12 72 16,000 Japanese workers; they reported that professionals had better oral conditions  
13  
14 73 than office workers and blue collar workers in Japan.<sup>15 16</sup> Tsakos et al. reported  
15  
16 74 significant social gradients in oral health, based on a sample of 6,600  
17  
18 75 community-dwelling English people aged 50 years and older.<sup>17</sup> However, none of these  
19  
20 76 considered workplace-related factors, such as social support, working hours, type of  
21  
22 77 employment or job stress, as potential mediators of the association between occupations  
23  
24 78 and oral health. Psychological stress is associated with the workplace-related factors as  
25  
26 79 well as occupations, and, on the other hand, oral diseases, such as periodontitis and  
27  
28 80 gingivitis, are also associated with psychological stress.<sup>19-22</sup> Therefore,  
29  
30 81 workplace-related factors may be candidates for mitigating oral health disparities. and,  
31  
32 82 we hypothesized that job stress (including work hours) – as well as stress-buffering  
33  
34 83 factors such as workplace social support – would mediate the association between  
35  
36 84 occupational class and oral health.

37  
38  
39 85 In this study, we first examined data of 3,201 workers aged 25-50 years old in  
40  
41 86 Japan to elucidate the associations between indicators of SEP (occupation, income  
42  
43 87 wealth, education and SEP in childhood) and oral health. We then examined the  
44  
45 88 mediation of socioeconomic disparities by workplace-related factors (social support in  
46  
47 89 workplace, job stress, working hours and type of employment).

50  
51

## 52 91 **METHODS**

### 53 92 **Participants**

54  
55  
56 93 We conducted the present study by using data from the J-SHINE (Japanese  
57  
58  
59  
60

1  
2  
3  
4  
5  
6 94 study of Stratification, Health, Income, and Neighborhood), the details of which have  
7  
8 95 been previously described.<sup>23</sup> In brief, between October 2010 and February 2011, 13,920  
9  
10 96 community-dwelling residents aged 25 to 50 years were probabilistically and randomly  
11  
12 97 selected from four municipalities in and around Tokyo, Japan, with using the Basic  
13  
14 98 Resident Registration System. Independent survey agencies were contracted to conduct  
15  
16 99 the surveys, and the professional surveyors who had more than three years of  
17  
18 100 experience in conducting interview-based social surveys made contacts with the eligible  
19  
20 101 individuals after attending training sessions to conduct the J-SHINE study. The main  
21  
22 102 reasons the surveyors were not able to receive responses from the eligible participants  
23  
24 103 were as follows: “inaccessible contact (n=4371)” and “refusal of invitation (n=3677)”. Of  
25  
26 104 those who were invited, 4,385 men and women responded (31.6%) to the invitation;  
27  
28 105 these individuals formed the baseline of the J-SHINE study. A questionnaire was  
29  
30 106 self-administered using a computer-assisted personal interview format, unless the  
31  
32 107 participants requested a face-to-face interview. We excluded participants who did not  
33  
34 108 answer the question about self-rated oral health, or who responded that they were not  
35  
36 109 active in the labor market (including homemakers and students); this result in 3,201  
37  
38 110 eligible participants.  
39  
40  
41  
42  
43

#### 44 112 Measurements

45  
46 113 All measures in this study were obtained by self-report. Basic demographic  
47  
48 114 variables included sex (men/women), age (categorized as 25-29, 30-34, 35-39, 40-44, and  
49  
50 115 45-50 years old), and marital status (categorized as married/not married). Self-rated  
51  
52 116 oral health (SROH) was used to evaluate oral conditions. SROH is a screening tool that  
53  
54 117 can evaluate needs of dental care among people, especially those who do not usually  
55  
56 118 visit dentists, and its validity and high internal consistency have been confirmed.<sup>24 25</sup>  
57  
58  
59  
60

1  
2  
3  
4  
5  
6 119 SROH was assessed by the following question. *“Overall, how would you rate the health*  
7  
8 120 *of your teeth and gums?”* Potential responses ranged from *“1.excellent, 2.good, 3.fair,*  
9  
10 121 *4.not so good or 5.poor”*. In the analysis, the outcome was dichotomized:”1.excellent and  
11  
12 122 2.good, 3.fair” as “Good SROH”, and “4.not so good and 5.poor” as “Poor SROH”.

13  
14 123 As indicators of SEP, we used annual household income, wealth, educational  
15  
16 124 attainment, occupation, and economic situations during childhood. Annual household  
17  
18 125 income was divided into tertiles; less than JPY 5 million (Approximately GBP 29,400),  
19  
20 126 JPY 5 to 7.5 million (GBP 29,400-44,100), or more than JPY 7.5 million (GBP 44,100).  
21  
22 127 Wealth was based on household financial and other assets (e.g. stock, bond, and so on)  
23  
24 128 and was divided into tertiles; less than JPY 3 million (GBP 17,600), JPY 3 to 5 million  
25  
26 129 (GBP 17,600-29,400), or more than JPY 5 million (GBP 29,400). Educational attainment  
27  
28 130 was divided into three categories; high school or less, vocational/junior college, and  
29  
30 131 university or more. Occupational class was divided into three categories; professionals,  
31  
32 132 office workers or blue collar workers. Occupations were self-reported, but, in addition, a  
33  
34 133 sociologist on the team (K.K.) examined each response to determine the correct  
35  
36 134 classification based on the detailed job description provided by the participants. Our  
37  
38 135 method of occupational classification was previously used in “The national survey of  
39  
40 136 Social Stratification and social Mobility”, which has been conducted in Japan every ten  
41  
42 137 years since 1955 and is regarded as the most valid classification of occupations in  
43  
44 138 Japan.<sup>26</sup> Economic conditions in childhood were evaluated through the following  
45  
46 139 questions. *“How would you rate the economic conditions in your household at age five?”*  
47  
48 140 and *“How would you rate the economic conditions in your household at age fifteen?”*”The  
49  
50 141 answers were selected from *“1.very difficult, 2. difficult, 3.normal, 4. well off 5. very well*  
51  
52 142 *off”*. In the analysis, the answers were divided into three groups: “1.very difficult, 2.  
53  
54 143 difficult”, “3.normal” and “4. well off 5. very well off”. This question was derived from  
55  
56  
57  
58  
59  
60

1  
2  
3  
4  
5  
6 144 the Comprehensive Survey of Living Conditions, which is annually conducted by the  
7  
8 145 Ministry of Health, Labour, and Welfare, and is regarded as a standard way to evaluate  
9  
10 146 subjective economic situation in Japan.

11  
12  
13 147 With regard to workplace-related factors, job stress, social support in  
14  
15 148 workplace, working hours, and type of employment were used. Job stress was evaluated  
16  
17 149 by seven questions, which were taken from the Brief Job Stress Questionnaire (BJSQ).  
18  
19 150 BJSQ has been validated for use with Japanese workers, and consists of lists the 84  
20  
21 151 questions which assesses job stress, social support in workplace and subjective  
22  
23 152 physical/mental symptoms.<sup>27</sup> BJSQ has been used in workplaces in Japan and was used  
24  
25 153 in previous research in Japan.<sup>27</sup><sup>28</sup> One example of the seven questions on the job stress  
26  
27 154 was *"I have to deal with a lot of tasks"*, and the answer was chosen from *"1.yes, 2.rather*  
28  
29 155 *yes 3.rather no, 4.no"*. Aggregated scores for the seven questions were divided into  
30  
31 156 tertiles. Social support in workplace consisted of six questions, which were also taken  
32  
33 157 from BJSQ. One example of six questions was *"How reliable is your boss when you are*  
34  
35 158 *in trouble?"*, and the answer was chosen from *"1.very, 2.fairly 3.to some extent, 4.not"*.  
36  
37 159 Aggregated scores for the six questions were divided into tertiles. Working hours were  
38  
39 160 divided into four groups: less than 40 hours per week, 40 to 50 hours per week, 50 to 60  
40  
41 161 hours per week, or more than 60 hours per week. Type of employment was divided into  
42  
43 162 three groups: permanent, precarious or self-employment.  
44  
45  
46  
47

48 164 Statistical analysis

49  
50 165 Differences in background characteristics according to SROH (good or poor)  
51  
52 166 were compared using the chi-square test (Table1). We estimated logistic regression  
53  
54 167 models for the association between poor SROH and SEP. We computed sex- and age-  
55  
56 168 adjusted odds ratio (OR) and 95% confidence intervals (C.I.) for poor SROH among office  
57  
58  
59  
60

1  
2  
3  
4  
5  
6 169 workers and blue collar workers, compared with professionals. We also calculated the  
7  
8 170 ORs between each SEP and SROH (Table2), and the ORs between work-related factors  
9  
10 171 and SROH (Table3). Additionally, we estimated the multivariate ORs for the association  
11  
12 172 between occupations and SROH, adjusting for work-related factors, such as job stress  
13  
14 173 social support in workplace, working hours, and type of employment (Table4). With  
15  
16 174 regard to missing data on explanatory variables, we carried out 2 separate analyses. In  
17  
18 175 the first analysis, dummy variables were used for missing data, with creation of a  
19  
20 176 categorical indicator for missing responses (missing category) (Appendix Table1). In the  
21  
22 177 second analysis, we conducted multiple imputations for the missing data, included all  
23  
24 178 variables shown in Table1. Interactions between sex and the other variables  
25  
26 179 (age/marital status/job stress/social support in the workplace/working hour/type of  
27  
28 180 employment) were tested by entering multiplicative interaction terms into the  
29  
30 181 multivariate adjusted model, because employment situation in Japan is highly different  
31  
32 182 in men and women. SAS 9.3 (SAS Institute, Cary, NC) was used for all statistical  
33  
34 183 analyses, and “Proc MI” and “Proc MIANALYZE” were used for the multiple  
35  
36 184 imputations  
37  
38  
39  
40  
41

## 42 Ethics

43  
44 187 The study of J-SHINE was approved by the ethics committee of the Graduate School of  
45  
46 188 Medicine and Faculty of Medicine, The University of Tokyo. The data analyzed in this  
47  
48 189 study are de-identified data made available to researchers who are registered as  
49  
50 190 members of the J-SHINE research team  
51

52  
53  
54

## 55 Results

56  
57 193 The distribution of answers for the SROH was as follows; 1.excellent (N of 407),  
58  
59  
60

1  
2  
3  
4  
5  
6 194 2.good (N of 772), 3.fair (N of 1155), 4.not so good (N of 738) and 5.poor (N of 129). Table  
7  
8 195 1 describes the basic characteristics of the study participants according to level of SROH.  
9  
10 196 All of the characteristics except marital status were significantly associated with SROH.  
11  
12 197 Poor SROH was more prevalent in men, older age-groups, blue collar workers,  
13  
14 198 precarious workers, as well as those with lower income, lower wealth, lower educational  
15  
16 199 attainment, higher childhood poverty, lower social support, higher stress and longer  
17  
18 200 working hours.

20 201 Table 2 shows the sex- and age- adjusted odds ratios and 95% CI for the  
21  
22 202 associations between various indicators of SEP (occupation, income, wealth, education,  
23  
24 203 and two indicators of childhood SEP) and poor SROH. All indicators of SEP were  
25  
26 204 inversely associated with SROH. The association with SROH was significant only for  
27  
28 205 the lowest levels in occupation, income and childhood SEP, while the association was  
29  
30 206 comparatively larger in magnitude and significant for the intermediate levels as well as  
31  
32 207 for the lowest levels in education and wealth. Blue collar workers had significantly  
33  
34 208 higher OR of poor SROH (1.44, 95% CI: 1.07-1.95). Educational attainment, current  
35  
36 209 income, wealth and SEP during childhood were also associated with poor SROH.

37  
38 210 Table 3 describes crude ORs and 95% CI for associations between  
39  
40 211 workplace-related factors (job stress, social support in workplace, working hour and  
41  
42 212 type of employment) and poor SROH. All of the factors were associated with poor SROH.  
43  
44 213 Workers with the most stress as well as low social support had higher odds of poor  
45  
46 214 SROH compared with those with less job stress or more social support. Those who  
47  
48 215 reported working more than 60 hours per week had poorer SROH than those who  
49  
50 216 worked 40-50 hours per week (OR: 1.69, 95%CI 1.20-2.39). Precarious workers had  
51  
52 217 higher OR for poor oral health (1.32, 95% CI: 1.11-1.57), compared with permanent  
53  
54 218 workers.

1  
2  
3  
4  
5  
6 219 Table 4 shows the multivariate ORs and 95% CI for poor SROH from the  
7  
8 220 multiple imputation models. The associations between occupational class and poor  
9  
10 221 SROH were substantially attenuated by work-related factors. Approximately 60% of the  
11  
12 222 association between occupations and poor SROH was explained by the work-related  
13  
14 223 factors.<sup>28</sup> In the multivariate model, all of the workplace-related factors (social support,  
15  
16 224 job stress, type of employment and working hours) were significantly associated with  
17  
18 225 poor SROH. Compared with the analysis that employed dummy categories for missing  
19  
20 226 values (Appendix Table1), we found similar results after accounting for missing values  
21  
22 227 using multiple imputations. None of the interactions were significant; occupation  
23  
24 228 (p=0.19), age (p=0.74), marital status (p=0.44), job stress (p=0.25), job support (p=0.50),  
25  
26 229 working hours (p=0.83), and type and employment (p=0.73).

230

## 231 Discussion

232 In the present study, we found oral health disparity across various indicators of  
233 SEP as well as childhood SEP among workers in Japan. Moreover, the association  
234 between occupations and SROH was substantially explained by job-related factors. Our  
235 finding is notable for demonstrating oral health disparities even in Japan. The  
236 Japanese universal health coverage includes most of dental service as well as medical  
237 services, and the citizens, including children and older adults, have access to dental  
238 services with relatively low out-of-pocket cost. For most of adult patients, 70 % of dental  
239 care payments are covered by the universal health care insurance. For people with 70 or  
240 older, 80% of the payments are covered.<sup>29</sup> Besides, the copayments among children are  
241 reimbursed in more than half of local governments, depending on their policies. Our  
242 findings are consistent with a previous study by Morita et al., which reported that there  
243 were significant oral health disparities across occupations.<sup>16</sup> We found oral health



1  
2  
3  
4  
5  
6 244 disparities across occupations as well as other indicators of SEP, including income,  
7  
8 245 wealth, and childhood SEP. Tsakos, et al. reported social gradients across occupation,  
9  
10 246 income, wealth and parental occupation, among older individuals in England.<sup>17</sup>  
11

12 247 One reason why people with higher SEP had better SROH may be related to  
13  
14 248 preventive practices – e.g. dental flossing or use of interdental brush (interproximal  
15  
16 249 brush). Neamatol et al. reported that students with doctorate or masters degrees flossed  
17  
18 250 more than those with bachelor degree or less<sup>30</sup>, while Tseveenjav et al. reported that  
19  
20 251 people with higher educational attainment performed cleaning more than the others.<sup>31</sup>  
21  
22 252 Another reason people in higher SEP had better SROH might be utilization of  
23  
24 253 preventive dentistry. People with lower incomes tend to use preventive dental service  
25  
26 254 less frequently<sup>32 33</sup>, and the difference of use in preventive service might explain the  
27  
28 255 social gradient of SROH. In fact, in the present study, approximately one in three  
29  
30 256 participants (32.3%) among the richest group made a preventive dental clinic visit in  
31  
32 257 the past year, whereas only one in four participants (24.7%) among the poorest group  
33  
34 258 did so. On the other hand, we did not observe a big difference among rich and poor  
35  
36 259 participants in the use of dental services for treatment; 42.3% for the richest group  
37  
38 260 versus 41.4% for the poorest group. Thus, the pathway from lower household income to  
39  
40 261 poor SROH might be through preventive dental service utilization.  
41  
42  
43

44 262 Another explanation for the relationship between SEP and SROH might be  
45  
46 263 through psychosocial factors. Baker et al reported that greater sense of coherence and  
47  
48 264 higher self-esteem were linked to better oral health perceptions.<sup>34</sup> Therefore, these  
49  
50 265 factors might be mediators between SEP and SROH because those who are in higher  
51  
52 266 SEP, including occupations, have, in general, higher self-esteem and sense of coherence.  
53

54 267 Our findings add to the previous literature by suggesting that occupational  
55  
56 268 inequalities in oral health can be substantially explained by work-based factors, such as,  
57  
58  
59  
60

1  
2  
3  
4  
5  
6 269 social support in the workplace, job stress, working hours, and type of employment  
7  
8 270 (precarious vs. permanent). These workplace-related factors might be targets for  
9  
10 271 interventions to mitigate oral health disparities, i.e. in addition to intervening to  
11  
12 272 improve socioeconomic conditions, it may be possible focus on working conditions to  
13  
14 273 reduce oral health disparities.

15  
16 274 Social support has been reported to have a “stress-buffering effect” on  
17  
18 275 cardiovascular diseases.<sup>35-37</sup> Stress has been reported as one of the exacerbating factors  
19  
20 276 for periodontitis or gingivitis. Hugo FN et al. reported that stress was a significant risk  
21  
22 277 factor for gingivitis<sup>21</sup>, and Krejci CB, et al. suggested that stress may hasten the  
23  
24 278 development and progression of periodontitis through the suppression of T-cell activity  
25  
26 279 or a reduction in salivary IgA.<sup>19 20</sup> Precarious employment was also significantly  
27  
28 280 associated with poor SROH in the multivariate model. Previous studies on precarious  
29  
30 281 employment showed that this form of work is associated with job insecurity and  
31  
32 282 psychological distress<sup>38 39</sup>, and, therefore, being in a precarious employment might also  
33  
34 283 a risk factor of developing periodontitis or gingivitis via stress. The number of  
35  
36 284 precarious employees has been increasing all over the world as well as in Japan. In  
37  
38 285 Japan 35.2% of total workers in 2012 were precarious workers, while only 16.4% were in  
39  
40 286 1985.<sup>40</sup>

41  
42  
43 287 Previous studies have suggested a consistent link between early life-course  
44  
45 288 socioeconomic circumstances and health status in adulthood.<sup>3 5 41 42</sup> Our study is  
46  
47 289 consistent with previous research in showing an association between childhood SEP and  
48  
49 290 oral health. Poulton R et al. examined 1,000 children in New Zealand and found that  
50  
51 291 there was a significant social gradient of dental health (tooth cleanliness, gingival  
52  
53 292 bleeding, periodontal disease, and tooth decay) across childhood SEP.<sup>3</sup> Thomson et al.  
54  
55 293 examined 789 individuals and revealed that those who were in low socioeconomic status  
56  
57  
58  
59  
60

1  
2  
3  
4  
5  
6 294 at age 5 years were more likely to have lost a tooth in adulthood because of caries and  
7  
8 295 had greater prevalence and extent of periodontitis.<sup>5</sup> In our study, when poverty during  
9  
10 296 the childhood at age five or fifteen was added to the multivariate model, both poverty  
11  
12 297 during childhood at age five and at age fifteen were associated with poorer SROH (OR:  
13  
14 298 1.60, 95%CI: 1.23-2.08 at age five, and OR: 1.47, 95%CI: 1.15-1.87 at age fifteen,  
15  
16 299 respectively, not shown in tables). These two factors seemed to be independently  
17  
18 300 associated with SROH, because coefficients of the other covariates in the multivariate  
19  
20 301 model hardly changed before and after adding the childhood poverty variables to the  
21  
22 302 multivariate model. Therefore, poverty during childhood appears to affect SROH in  
23  
24 303 adulthood separately from sex, age, and the current workplace-related factors. In Japan,  
25  
26 school children do receive oral checkups for free, however, they do not receive free dental  
27  
28 care. Therefore, economic difficulties during childhood might result in oral health  
29  
30 disparities during childhood, leading to oral health disparities during adults.  
31  
32

33  
34 307

35 308 · Limitations

36  
37 309 There are some limitations in this study. First, SROH is a subjective  
38  
39 310 measurement. Some might argue that this type of measurement might be invalid,  
40  
41 311 however, self-rated oral health has been examined and reported to be a well-validated  
42  
43 312 and reliable index.<sup>24 25</sup> Jones JA et al. validated the association between a single-item  
44  
45 313 self-report question and oral clinical examination among two hundred thirty-two  
46  
47 314 community-dwelling participants. The question was “How would you describe the  
48  
49 315 health of your teeth and gums? Would you say it is excellent, very good, good, fair or  
50  
51 316 poor?” They reported that the single-item self-reported question had a sensitivity of 0.75  
52  
53 317 and a specificity of 0.67 in identifying persons with severe need for denture care,  
54  
55 318 compared with the clinical examination.<sup>24</sup> The validation studies were conducted in  
56  
57  
58  
59  
60

1  
2  
3  
4  
5  
6 319 English, and the present study was conducted in Japanese. As far as we know, no  
7  
8 320 previous studies have validated the scale in Japanese yet. However, we have confirmed  
9  
10 321 that poor SROH was significantly associated with number of removed tooth in the  
11  
12 322 sample (Appendix Table2). Ando et al confirmed the validity of self-reported number of  
13  
14 323 remaining teeth and clinical examination in Japanese.<sup>43</sup> Therefore, this might support  
15  
16 324 that the scale in Japanese is also valid. Future studies are needed to clarify the validity  
17  
18 325 of the scale in Japanese. Secondly, the response rate was low. However, Takada et. al.  
19  
20 326 compared the collected sample with the vital statistics in Census 2010 of the target  
21  
22 327 population and reported that the obtained sample was properly equivalent with respect  
23  
24 328 to age, sex, and education.<sup>23</sup> Therefore, it is likely that the selection bias does not matter  
25  
26 329 in terms of age, sex and education. We are not able to discuss selection bias precisely  
27  
28 330 because we do not have other information among non-responders, such as smoking  
29  
30 331 habit, income and so on. Thirdly, the data used in this study was cross-sectional, not  
31  
32 332 longitudinal, therefore, we cannot infer causality. Thus, low SEP could cause worse oral  
33  
34 333 health; but the reverse is also possible, i.e. it is well described that poor dental status  
35  
36 334 can lead to social stigma and adversely impact people's chances of employment and  
37  
38 335 success in life.<sup>44</sup> Attention should be given to the positive association between current  
39  
40 336 poor SROH and economic disadvantage in childhood, because the assessments of  
41  
42 337 economic disadvantage in childhood were based on the participants' recall (recall bias).  
43  
44 338 Fourth, we did not gather data on brushing frequency or use of interdental brush/dental  
45  
46 339 flossing<sup>31</sup>, and we could not include these factors in the analysis. Some studies reported  
47  
48 340 that people with lower educational attainment or low income use interdental  
49  
50 341 brush/dental flossing less, and this might explain the association between SEPs and  
51  
52 342 poorer SROH. Finally, the 7 items for job stress and the 6 items for social support at  
53  
54 343 workplace were not validated. However, both have been used in practice in Japan, and  
55  
56  
57  
58  
59  
60

1  
2  
3  
4  
5  
6 344 the internal consistency of the scale in the present participants was acceptably high:  
7  
8 345 Cronbach's alpha coefficient was 0.90 for the 7 items for job stress, and 0.91 for the 6  
9  
10 346 items for social support. Future studies should employ well-validated questions on job  
11  
12 347 stress and social support.  
13

14  
15  
16

### 17 349 **Conclusion**

18  
19 350 We found oral health disparities across various SEPs, and that work-related  
20  
21 351 factors could account for more than half the association between occupation and SROH .  
22  
23 352 Improving workplace environments may present a viable solution to reduce oral health  
24  
25 353 disparities. Future studies on the effect of workplace-related factors on oral health  
26  
27 354 should use longitudinal data to elucidate the causal association between the  
28  
29 355 workplace-related factors and oral health.  
30

31 356

32  
33 357

### 34 358 **Acknowledgments**

35  
36  
37 359 The authors thank Prof. Hideki Hashimoto, Prof. Norito Kawakami and their  
38  
39 360 team for providing us with data from the Japanese Study of Stratification, Health,  
40  
41 361 Income, and Neighborhood (J-SHINE). The authors also thank Dr. Akiomi Inoue and Dr.  
42  
43 362 Hiroshi Kanbayashi for his valuable advice.  
44

45 363

46  
47  
48 364

49  
50 365 **Contributors:** TT, JA, IK, KK, and KO made substantial contribution to the concept and  
51  
52 366 design of the study. TT drafted the manuscript and JA, IK, KK, and KO revised it  
53  
54 367 critically for important intellectual content. TT, JA, IK, KK, and KO approved the final  
55  
56 368 version of the manuscript.  
57  
58  
59  
60

1  
2  
3  
4  
5  
6 369

7  
8 370 **Competing interest:** None declared.

9  
10 371

11 372 **Funding:** This work was supported by a Grant-in-Aid for Scientific Research on  
12  
13 Innovative Areas 2009-2013 (No. 21119002, No. 21119001 and 21119007) from the  
14 373 Ministry of Education, Culture, Sports, Science and Technology, Japan. T Tsuboya is  
15  
16 374 supported by Grant-in-Aid for Epidemiological Research (St. Luke's Life Science  
17  
18 375 Institute). These sponsors were not involved in study design and the collection, analysis,  
19  
20 376 and interpretation of data and the writing of the article and the decision to submit it for  
21  
22 377 publication.  
23  
24 378  
25  
26  
27 379

28  
29 380 **Data sharing:** No additional data are available.  
30  
31 381

32  
33 382

34  
35 383 **REFERENCES**

36  
37 384 1. Murray CJ, Vos T, Lozano R, et al. Disability-adjusted life years (DALYs) for 291 diseases  
38  
39 385 and injuries in 21 regions, 1990-2010: a systematic analysis for the Global Burden of  
40  
41 386 Disease Study 2010. *Lancet* 2012;**380**(9859):2197-223.

42  
43 387 2. Marcenes W, Kassebaum NJ, Bernabe E, et al. Global burden of oral conditions in  
44  
45 388 1990-2010: a systematic analysis. *Journal of dental research* 2013;**92**(7):592-7.

46  
47 389 3. Poulton R, Caspi A, Milne BJ, et al. Association between children's experience of  
48  
49 390 socioeconomic disadvantage and adult health: a life-course study. *Lancet*  
50  
51 391 2002;**360**(9346):1640-5.

52  
53 392 4. Sabbah W, Watt RG, Sheiham A, et al. Effects of allostatic load on the social gradient in  
54  
55 393 ischaemic heart disease and periodontal disease: evidence from the Third National  
56  
57  
58  
59  
60

- 1  
2  
3  
4  
5  
6 394 Health and Nutrition Examination Survey. *Journal of epidemiology and community*  
7 395 *health* 2008;**62**(5):415-20.
- 8  
9  
10 396 5. Thomson WM, Poulton R, Milne BJ, et al. Socioeconomic inequalities in oral health in  
11 397 childhood and adulthood in a birth cohort. *Community dentistry and oral*  
12 398 *epidemiology* 2004;**32**(5):345-53.
- 13  
14  
15  
16 399 6. Sabbah W, Tsakos G, Sheiham A, et al. The role of health-related behaviors in the  
17 400 socioeconomic disparities in oral health. *Social science & medicine*  
18 401 2009;**68**(2):298-303.
- 19  
20  
21  
22 402 7. Aida J, Kondo K, Yamamoto T, et al. Oral health and cancer, cardiovascular, and  
23 403 respiratory mortality of Japanese. *Journal of dental research* 2011;**90**(9):1129-35.
- 24  
25  
26  
27 404 8. Polzer I, Schwahn C, Volzke H, et al. The association of tooth loss with all-cause and  
28 405 circulatory mortality. Is there a benefit of replaced teeth? A systematic review and  
29 406 meta-analysis. *Clinical oral investigations* 2012;**16**(2):333-51.
- 30  
31  
32  
33 407 9. Kawachi I, Berkman L. *Social Epidemiology*. 1st edition: Oxford University Press, USA,  
34 408 2000.
- 35  
36  
37  
38 409 10. Drury TF, Garcia I, Adesanya M. Socioeconomic disparities in adult oral health in the  
39 410 United States. *Annals of the New York Academy of Sciences* 1999;**896**:322-4.
- 41  
42 411 11. Astrom AN, Haugejorden O, Skaret E, et al. Oral Impacts on Daily Performance in  
43 412 Norwegian adults: the influence of age, number of missing teeth, and  
44 413 socio-demographic factors. *European journal of oral sciences* 2006;**114**(2):115-21.
- 45  
46  
47  
48 414 12. Lopez R, Fernandez O, Baelum V. Social gradients in periodontal diseases among  
49 415 adolescents. *Community dentistry and oral epidemiology* 2006;**34**(3):184-96.
- 50  
51  
52 416 13. Sabbah W, Tsakos G, Chandola T, et al. Social gradients in oral and general health.  
53 417 *Journal of dental research* 2007;**86**(10):992-6.
- 54  
55  
56 418 14. Tsakos G, Sheiham A, Iliffe S, et al. The impact of educational level on oral  
57  
58  
59  
60

- 1  
2  
3  
4  
5  
6 419 health-related quality of life in older people in London. *European journal of oral*  
7  
8 420 *sciences* 2009;**117**(3):286-92.
- 9  
10 421 15. Morita I, Nakagaki H, Yoshii S, et al. Gradients in periodontal status in Japanese  
11  
12 422 employed males. *Journal of clinical periodontology* 2007;**34**(11):952-6.
- 13  
14 423 16. Morita I, Nakagaki H, Yoshii S, et al. Is there a gradient by job classification in dental  
15  
16 424 status in Japanese men? *European journal of oral sciences* 2007;**115**(4):275-9.
- 17  
18 425 17. Tsakos G, Demakakos P, Breeze E, et al. Social gradients in oral health in older adults:  
19  
20 426 findings from the English longitudinal survey of aging. *American journal of public*  
21  
22 427 *health* 2011;**101**(10):1892-9.
- 23  
24 428 18. Sanders AE, Spencer AJ. Social inequality in perceived oral health among adults in  
25  
26 429 Australia. *Australian and New Zealand journal of public health* 2004;**28**(2):159-66.
- 27  
28  
29 430 19. Seymour GJ. Importance of the host response in the periodontium. *Journal of clinical*  
30  
31 431 *periodontology* 1991;**18**(6):421-6.
- 32  
33 432 20. Krejci CB, Bissada NF. Periodontitis--the risks for its development. *General dentistry*  
34  
35 433 2000;**48**(4):430-6; quiz 37-8.
- 36  
37 434 21. Hugo FN, Hilgert JB, Bozzetti MC, et al. Chronic stress, depression, and cortisol levels  
38  
39 435 as risk indicators of elevated plaque and gingivitis levels in individuals aged 50  
40  
41 436 years and older. *Journal of periodontology* 2006;**77**(6):1008-14.
- 42  
43 437 22. Doyle CJ, Bartold PM. How does stress influence periodontitis? *Journal of the*  
44  
45 438 *International Academy of Periodontology* 2012;**14**(2):42-9.
- 46  
47 439 23. Takada M, Kondo N, Hashimoto H. Japanese study on stratification, health, income, and  
48  
49 440 neighborhood: study protocol and profiles of participants. *Journal of epidemiology /*  
50  
51 441 *Japan Epidemiological Association* 2014;**24**(4):334-44.
- 52  
53  
54 442 24. Jones JA, Spiro A, 3rd, Miller DR, et al. Need for dental care in older veterans:  
55  
56 443 assessment of patient-based measures. *Journal of the American Geriatrics Society*  
57  
58  
59  
60



- 1  
2  
3  
4  
5  
6 444 2002;**50**(1):163-8.
- 7  
8 445 25. Jones JA, Kressin NR, Miller DR, et al. Comparison of patient-based oral health outcome  
9  
10 446 measures. *Quality of life research : an international journal of quality of life aspects*  
11  
12 447 of treatment, care and rehabilitation 2004;**13**(5):975-85.
- 13  
14 448 26. Grusky DB, Sato Y, Jan O, et al, Social Mobility in Japan: A New Approach to Modeling  
15  
16 449 Trend in Mobility 2008.  
17  
18 450 [http://www.stanford.edu/group/scspi/grusky/article\\_files/social\\_mobility\\_japan.pdf](http://www.stanford.edu/group/scspi/grusky/article_files/social_mobility_japan.pdf).  
19  
20 451 Accessed Apr. 15<sup>th</sup> 2014.
- 21  
22 452 27. Inoue A, Kawakami N, Shimomitsu T, et al. Development of a short questionnaire to  
23  
24 453 measure an extended set of job demands, job resources, and positive health  
25  
26 454 outcomes: the new brief job stress questionnaire. *Industrial health*  
27  
28 455 2014;**52**(3):175-89.
- 29  
30  
31 456 28. Kato S, Doi Y, Tsutsui S, et al. [Job stress among Japan Overseas Cooperation  
32  
33 457 volunteers--using the Brief Job Stress Questionnaire]. *Sangyo eiseigaku zasshi =*  
34  
35 458 *Journal of occupational health* 2004;**46**(6):191-200.
- 36  
37 459 29. Ikegami N, Yoo BK, Hashimoto H, et al. Japanese universal health coverage: evolution,  
38  
39 460 achievements, and challenges. *Lancet* 2011;**378**(9796):1106-15.
- 40  
41  
42 461 30. Neamatollahi H, Ebrahimi M. Oral health behavior and its determinants in a group of  
43  
44 462 Iranian students. *Indian journal of dental research : official publication of Indian*  
45  
46 463 *Society for Dental Research* 2010;**21**(1):84-8.
- 47  
48 464 31. Tseveenjav B, Suominen-Taipale L, Varsio S, et al. Patterns of oral cleaning habits and  
49  
50 465 use of fluoride among dentate adults in Finland. *Oral health & preventive dentistry*  
51  
52 466 2010;**8**(3):287-94.
- 53  
54 467 32. Pizarro V, Ferrer M, Domingo-Salvany A, et al. The utilization of dental care services  
55  
56 468 according to health insurance coverage in Catalonia (Spain). *Community dentistry*

- 1  
2  
3  
4  
5  
6 469 and oral epidemiology 2009;**37**(1):78-84.
- 7  
8 470 33. Chi DL, Rossitch KC, Beeles EM. Developmental delays and dental caries in low-income  
9  
10 471 preschoolers in the USA: a pilot cross-sectional study and preliminary explanatory  
11  
12 472 model. BMC oral health 2013;**13**:53.
- 13  
14 473 34. Baker SR, Mat A, Robinson PG. What psychosocial factors influence adolescents' oral  
15  
16 474 health? Journal of dental research 2010;**89**(11):1230-5.
- 17  
18 475 35. Gerin W, Milner D, Chawla S, et al. Social support as a moderator of cardiovascular  
19  
20 476 reactivity in women: a test of the direct effects and buffering hypotheses.  
21  
22 477 Psychosomatic medicine 1995;**57**(1):16-22.
- 23  
24 478 36. Uchino BN, Cacioppo JT, Kiecolt-Glaser JK. The relationship between social support and  
25  
26 479 physiological processes: a review with emphasis on underlying mechanisms and  
27  
28 480 implications for health. Psychological bulletin 1996;**119**(3):488-531.
- 29  
30 481 37. Uchino BN. Social support and health: a review of physiological processes potentially  
31  
32 482 underlying links to disease outcomes. Journal of behavioral medicine  
33  
34 483 2006;**29**(4):377-87.
- 35  
36 484 38. Tsurugano S, Inoue M, Yano E. Precarious employment and health: analysis of the  
37  
38 485 Comprehensive National Survey in Japan. Industrial health 2012;**50**(3):223-35.
- 39  
40 486 39. Vives A, Amable M, Ferrer M, et al. Employment precariousness and poor mental health:  
41  
42 487 evidence from Spain on a new social determinant of health. Journal of  
43  
44 488 environmental and public health 2013;**2013**:978656.
- 45  
46 489 40. Ministry of Health , Labour and Welware. Current situation on precarious workers (in  
47  
48 490 Japanese).  
49  
50 491 [http://www.mhlw.go.jp/seisakunitsuite/bunya/koyou\\_roudou/part\\_haken/genjou/](http://www.mhlw.go.jp/seisakunitsuite/bunya/koyou_roudou/part_haken/genjou/)  
51  
52 492 Accessed Apr. 15<sup>th</sup> 2014.
- 53  
54 493 41. Lynch JW, Kaplan GA, Cohen RD, et al. Childhood and adult socioeconomic status as  
55  
56  
57  
58  
59  
60

- 1  
2  
3  
4  
5  
6 494 predictors of mortality in Finland. *Lancet* 1994;**343**(8896):524-7.  
7  
8 495 42. Black RE, Victora CG, Walker SP, et al. Maternal and child undernutrition and  
9  
10 496 overweight in low-income and middle-income countries. *Lancet*  
11  
12 497 2013;**382**(9890):427-51.  
13  
14 498 43. Ando Y, Ikeda S, Yoshihara A. The reliability of self-assessment of number of remaining  
15  
16 499 teeth using questionnaires. *Journal of Dental Health* 1997(47):657-62.  
17  
18 500 44. Horton S, Barker JC. Stigmatized biologies: Examining the cumulative effects of oral  
19  
20 501 health disparities for Mexican American farmworker children. *Medical anthropology*  
21  
22 502 quarterly 2010;**24**(2):199-219.  
23  
24 503  
25  
26 504  
27  
28 505  
29  
30 506  
31  
32 507  
33  
34  
35  
36  
37  
38  
39  
40  
41  
42  
43  
44  
45  
46  
47  
48  
49  
50  
51  
52  
53  
54  
55  
56  
57  
58  
59  
60

Table 1. Characteristics of participants by status of self-rated oral health (SROH) among 3,201 men and women aged 25-50 years old in Japan during 2010-2011

| Characteristic                                                     | Poor SROH <sup>a</sup> |        | <i>p</i> -value <sup>b</sup> |
|--------------------------------------------------------------------|------------------------|--------|------------------------------|
|                                                                    | n                      | (%)    |                              |
| Sex                                                                |                        |        |                              |
| Men                                                                | 529                    | (29.7) | 0.0002                       |
| Women                                                              | 334                    | (23.8) |                              |
| Age                                                                |                        |        |                              |
| 25-29                                                              | 132                    | (22.5) | 0.0001                       |
| 30-34                                                              | 138                    | (25.0) |                              |
| 35-39                                                              | 173                    | (27.2) |                              |
| 40-44                                                              | 175                    | (25.8) |                              |
| 45-50                                                              | 225                    | (33.8) |                              |
| Marital status                                                     |                        |        |                              |
| Married                                                            | 597                    | (27.9) | 0.14                         |
| Not married <sup>c</sup>                                           | 269                    | (25.5) |                              |
| Occupations                                                        |                        |        |                              |
| Specialists                                                        | 83                     | (28.0) | 0.0009                       |
| White collar workers                                               | 497                    | (24.9) |                              |
| Blue collar workers                                                | 287                    | (31.5) |                              |
| Annual household income                                            |                        |        |                              |
| Less than 5 million JPY (Approximately GBP 29,400) <sup>d</sup>    | 226                    | (32.3) | 0.0012                       |
| 5-7.5 million JPY (Approximately GBP 29,400-44,100) <sup>d</sup>   | 179                    | (26.6) |                              |
| More than 7.5 mil JPY (Approximately GBP 44,100) <sup>d</sup>      | 250                    | (24.3) |                              |
| Wealth (Household financial and other assets)                      |                        |        |                              |
| Less than 3 million JPY (Approximately GBP 17,600) <sup>d</sup>    | 201                    | (34.7) | <.0001                       |
| 3-5 million JPY (Approximately GBP 17,600-29,400) <sup>d</sup>     | 169                    | (30.2) |                              |
| More than 5 million JPY (Approximately GBP 29,400) <sup>d</sup>    | 173                    | (22.9) |                              |
| Education                                                          |                        |        |                              |
| High school or less                                                | 263                    | (36.3) | <.0001                       |
| Vocational/junior college                                          | 262                    | (26.9) |                              |
| University or more                                                 | 333                    | (22.7) |                              |
| Economic situation at home when respondents were five years old    |                        |        |                              |
| Poor, very poor                                                    | 226                    | (34.8) | <.0001                       |
| Normal                                                             | 502                    | (25.7) |                              |
| Well-off, very well-off                                            | 133                    | (23.5) |                              |
| Economic situation at home when respondents were fifteen years old |                        |        |                              |
| Poor, very poor                                                    | 216                    | (35.9) | <.0001                       |
| Normal                                                             | 467                    | (24.8) |                              |
| Well-off, very well-off                                            | 180                    | (25.9) |                              |

|    |                               |     |        |        |
|----|-------------------------------|-----|--------|--------|
| 1  | Job stress                    |     |        |        |
| 2  | 1st tertile(least stressful)  | 289 | (25.2) |        |
| 3  | 2nd tertile                   | 272 | (25.2) | 0.0017 |
| 4  | 3rd tertile(most stressful)   | 300 | (31.3) |        |
| 5  | Social support in workplace   |     |        |        |
| 6  | 1st tertile(most supportive)  | 266 | (23.4) |        |
| 7  | 2nd tertile                   | 278 | (29.1) | 0.0014 |
| 8  | 3rd tertile(least supportive) | 295 | (29.8) |        |
| 9  | Working hours per week        |     |        |        |
| 10 | <40                           | 360 | (26.7) |        |
| 11 | 40-50                         | 162 | (23.5) |        |
| 12 | 50-60                         | 81  | (26.3) | 0.027  |
| 13 | >60                           | 67  | (34.2) |        |
| 14 | Type of employment            |     |        |        |
| 15 | Permanent                     | 526 | (25.3) |        |
| 16 | Precarious                    | 272 | (30.9) | 0.0083 |
| 17 | Self-employed                 | 66  | (27.3) |        |

<sup>a</sup> The status of SROH was determined by the question: "Overall, how would you rate the health of your teeth and gums?". "Poor SROH" includes respondents of "not so good" and "poor", and "Good SROH" includes respondents of "excellent", "good" and "fair"

<sup>b</sup> P-value was calculated by chi-squared test.

<sup>c</sup> Divorced/separated and widow people were classified into "not married".

<sup>d</sup> Income and wealth were converted at 170 JPY (Japanese Yen) to 1 GBP (Great Britain Pound).

Table 2. Age- and sex- adjusted odds ratios and 95% confidence intervals for associations between socioeconomic positions and poor self-rated oral health among 3,201 men and women aged 25-50 years old in Japan during 2010-2011.

| Independent variable                                                      | odds ratio | 95% confidence interval | <i>p</i> -value |
|---------------------------------------------------------------------------|------------|-------------------------|-----------------|
| <b>Occupations</b>                                                        |            |                         |                 |
| Professionals                                                             | 1.00       |                         |                 |
| Office workers                                                            | 1.05       | ( 0.79 - 1.39 )         | 0.75            |
| Blue collar workers                                                       | 1.44       | ( 1.07 - 1.95 )         | 0.017           |
| <b>Household income</b>                                                   |            |                         |                 |
| Lowest tertile                                                            | 1.72       | ( 1.38 - 2.16 )         | <.0001          |
| Second tertile                                                            | 1.18       | ( 0.94 - 1.48 )         | 0.15            |
| Highest tertile (richest)                                                 | 1.00       |                         |                 |
| <b>Wealth (Household financial and other assets)</b>                      |            |                         |                 |
| Lowest tertile                                                            | 1.93       | ( 1.51 - 2.46 )         | <.0001          |
| Second tertile                                                            | 1.55       | ( 1.20 - 1.99 )         | 0.0007          |
| Highest tertile (richest)                                                 | 1.00       |                         |                 |
| <b>Educational attainment</b>                                             |            |                         |                 |
| High school or less                                                       | 1.98       | ( 1.63 - 2.42 )         | <.0001          |
| Vocational/junior college                                                 | 1.38       | ( 1.14 - 1.68 )         | 0.0012          |
| University or more                                                        | 1.00       |                         |                 |
| <b>Economic situation at home when respondents were five years old</b>    |            |                         |                 |
| Poor, very poor                                                           | 1.61       | ( 1.25 - 2.08 )         | 0.0003          |
| Normal                                                                    | 1.07       | ( 0.86 - 1.34 )         | 0.55            |
| Well-off, very well-off                                                   | 1.00       |                         |                 |
| <b>Economic situation at home when respondents were fifteen years old</b> |            |                         |                 |
| Poor, very poor                                                           | 1.53       | ( 1.20 - 1.95 )         | 0.0006          |
| Normal                                                                    | 0.91       | ( 0.74 - 1.11 )         | 0.33            |
| Well-off, very well-off                                                   | 1.00       |                         |                 |

SROH was assessed by the following question. "Overall, how would you rate the health of your teeth and gums?" Potential responses ranged from "1.excellent, 2.good, 3.fair, 4.not so good or 5.poor". In the analysis, the outcome was dichotomized: "1.excellent and 2.good, 3.fair" as "Good SROH", and "4.not so good and 5.poor" as "Poor SROH".

Table 3. Crude odds ratios and 95% confidence intervals for associations between workplace-related factors and poor self-rated oral health among 3,201 men and women aged 25-50 years old in Japan during 2010-2011.

| Independent variable          | odds ratio | 95% confidence interval | <i>p</i> -value |
|-------------------------------|------------|-------------------------|-----------------|
| Job stress                    |            |                         |                 |
| 1st tertile(least stressful)  | 1.00       |                         |                 |
| 2nd tertile                   | 1.00       | ( 0.83 - 1.21 )         | 0.99            |
| 3rd tertile(most stressful)   | 1.36       | ( 1.12 - 1.64 )         | 0.0018          |
| Social support in workplace   |            |                         |                 |
| 1st tertile(most supportive)  | 1.00       |                         |                 |
| 2nd tertile                   | 1.34       | ( 1.10 - 1.63 )         | 0.0033          |
| 3rd tertile(least supportive) | 1.39       | ( 1.14 - 1.68 )         | 0.001           |
| Working hours per week        |            |                         |                 |
| <40                           | 1.19       | ( 0.96 - 1.47 )         | 0.12            |
| 40-50                         | 1.00       |                         |                 |
| 50-60                         | 1.16       | ( 0.85 - 1.58 )         | 0.34            |
| >60                           | 1.69       | ( 1.20 - 2.39 )         | 0.0027          |
| Type of employment            |            |                         |                 |
| Permanent                     | 1.00       |                         |                 |
| Precarious                    | 1.32       | ( 1.11 - 1.57 )         | 0.002           |
| Self-employed                 | 1.10       | ( 0.82 - 1.49 )         | 0.52            |

SROH was assessed by the following question. “Overall, how would you rate the health of your teeth and gums?” Potential responses ranged from “1.excellent, 2.good, 3.fair, 4.not so good or 5.poor”. In the analysis, the outcome was dichotomized: “1.excellent and 2.good, 3.fair” as “Good SROH”, and “4.not so good and 5.poor” as “Poor SROH”.

Table 4. Multivariate odds ratios and 95% confidence intervals from multiple imputation analysis for associations with poor self-rated oral health among 3,201 men and women aged 25-50 years old in Japan during 2010-2011

| Independent variable               | odds ratio | 95%<br>confidence<br>interval | <i>p</i> -value |
|------------------------------------|------------|-------------------------------|-----------------|
| <b>Occupations</b>                 |            |                               |                 |
| Professionals                      | 1.00       |                               |                 |
| Office workers                     | 0.97       | ( 0.73 - 1.29 )               | 0.82            |
| Blue collar workers                | 1.18       | ( 0.86 - 1.61 )               | 0.29            |
| <b>Sex</b>                         |            |                               |                 |
| Men                                | 1.61       | ( 1.33 - 1.96 )               | <.0001          |
| Women                              | 1.00       |                               |                 |
| <b>Age</b>                         |            |                               |                 |
| 25-29                              | 0.88       | ( 0.66 - 1.16 )               | 0.36            |
| 30-34                              | 1.00       |                               |                 |
| 35-39                              | 1.10       | ( 0.85 - 1.44 )               | 0.45            |
| 40-44                              | 0.99       | ( 0.76 - 1.30 )               | 0.96            |
| 45-50                              | 1.49       | ( 1.14 - 1.93 )               | 0.0033          |
| <b>Marital status</b>              |            |                               |                 |
| Married                            | 1.00       |                               |                 |
| Not married <sup>b</sup>           | 1.01       | ( 0.84 - 1.22 )               | 0.89            |
| <b>Job stress</b>                  |            |                               |                 |
| 1st tertile(least stressful)       | 1.00       |                               |                 |
| 2nd tertile                        | 0.96       | ( 0.79 - 1.17 )               | 0.71            |
| 3rd tertile(most stressful)        | 1.26       | ( 1.03 - 1.54 )               | 0.025           |
| <b>Social support in workplace</b> |            |                               |                 |
| 1st tertile(most supportive)       | 1.00       |                               |                 |
| 2nd tertile                        | 1.25       | ( 1.02 - 1.52 )               | 0.029           |
| 3rd tertile(least supportive)      | 1.23       | ( 1.01 - 1.5 )                | 0.042           |
| <b>Working hours per week</b>      |            |                               |                 |
| <40                                | 1.12       | ( 0.88 - 1.43 )               | 0.35            |
| 40-50                              | 1.00       |                               |                 |
| 50-60                              | 1.06       | ( 0.72 - 1.57 )               | 0.75            |
| >60                                | 1.41       | ( 0.99 - 2.01 )               | 0.06            |
| <b>Type of employment</b>          |            |                               |                 |
| Permanent                          | 1.00       |                               |                 |
| Precarious                         | 1.57       | ( 1.26 - 1.96 )               | <.0001          |
| Self-employed                      | 1.12       | ( 0.82 - 1.53 )               | 0.49            |



1  
2  
3  
4  
5 a. SROH was assessed by the following question. “Overall, how would you rate the health of your  
6 teeth and gums?” Potential responses ranged from “1.excellent, 2.good, 3.fair, 4.not so good or  
7 5.poor”. In the analysis, the outcome was dichotomized:”1.excellent and 2.good, 3.fair” as “Good  
8 SROH”, and “4.not so good and 5.poor” as “Poor SROH”.  
9

10  
11  
12 b. Divorced/separated and widow people were classified into “not married”.  
13  
14  
15  
16  
17  
18  
19  
20  
21  
22  
23  
24  
25  
26  
27  
28  
29  
30  
31  
32  
33  
34  
35  
36  
37  
38  
39  
40  
41  
42  
43  
44  
45  
46  
47  
48  
49  
50  
51  
52  
53  
54  
55  
56  
57  
58  
59  
60

For peer review only

1  
2  
3  
4  
5  
6  
7  
8  
9  
10  
11  
12  
13  
14  
15  
16  
17  
18  
19  
20  
21  
22  
23  
24  
25  
26  
27  
28  
29  
30  
31  
32  
33  
34  
35  
36  
37  
38  
39  
40  
41  
42  
43  
44  
45  
46  
47  
48  
49  
50  
51  
52  
53  
54  
55  
56  
57  
58  
59  
60

For peer review only

Appendix Table1. Multivariate odds ratios and 95% confidence intervals for associations with poor self-rated oral health among 3,201 men and women aged 25-50 years old in Japan during 2010-2011

| Independent variable  | odds ratio | 95% confidence interval | <i>p-value</i> |
|-----------------------|------------|-------------------------|----------------|
| <b>Occupations</b>    |            |                         |                |
| Professionals         | 1.00       |                         |                |
| Office workers        | 0.96       | ( 0.72 - 1.29 )         | 0.79           |
| Blue collar workers   | 1.18       | ( 0.86 - 1.61 )         | 0.31           |
| <b>Sex</b>            |            |                         |                |
| Men                   | 1.61       | ( 1.32 - 1.96 )         | <.0001         |
| Women                 | 1.00       |                         |                |
| <b>Age</b>            |            |                         |                |
| 25-29                 | 0.86       | ( 0.65 - 1.14 )         | 0.29           |
| 30-34                 | 1.00       |                         |                |
| 35-39                 | 1.10       | ( 0.85 - 1.44 )         | 0.46           |
| 40-44                 | 1.00       | ( 0.77 - 1.30 )         | 0.98           |
| 45-50                 | 1.52       | ( 1.17 - 1.98 )         | 0.0016         |
| <b>Marital status</b> |            |                         |                |
| Married               | 1.00       |                         |                |
| Not married           | 0.99       | ( 0.82 - 1.19 )         | 0.91           |

Job stress

|                              |      |                 |      |
|------------------------------|------|-----------------|------|
| 1st tertile(least stressful) | 1.00 |                 |      |
| 2nd tertile                  | 0.96 | ( 0.79 - 1.17 ) | 0.66 |
| 3rd tertile(most stressful)  | 1.25 | ( 1.02 - 1.54 ) | 0.03 |

Social support in workplace

|                               |      |                 |       |
|-------------------------------|------|-----------------|-------|
| 1st tertile(most supportive)  | 1.00 |                 |       |
| 2nd tertile                   | 1.25 | ( 1.02 - 1.52 ) | 0.031 |
| 3rd tertile(least supportive) | 1.24 | ( 1.01 - 1.51 ) | 0.039 |

Working hours per week

|       |      |                 |       |
|-------|------|-----------------|-------|
| <40   | 1.15 | ( 0.92 - 1.45 ) | 0.23  |
| 40-50 | 1.00 |                 |       |
| 50-60 | 1.05 | ( 0.76 - 1.44 ) | 0.78  |
| >60   | 1.48 | ( 1.04 - 2.11 ) | 0.031 |

Type of employment

|               |      |                 |        |
|---------------|------|-----------------|--------|
| Permanent     | 1.00 |                 |        |
| Precarious    | 1.52 | ( 1.22 - 1.90 ) | 0.0002 |
| Self-employed | 1.11 | ( 0.80 - 1.54 ) | 0.53   |

---

Dummy variables were used for missing data, with creation of a categorical indicator for missing responses (missing category) in the analysis.

**Appendix Table2. Association between poor self-rated oral health (SROH) and self-reported number of removed tooth**

|                               |                   | Number of removed tooth |            |           |           |           |             | <i>p-value</i> <sup>b</sup> |
|-------------------------------|-------------------|-------------------------|------------|-----------|-----------|-----------|-------------|-----------------------------|
|                               |                   | 0                       | 1          | 2         | 3         | 4         | More than 4 |                             |
| <b>Poor SROH</b> <sup>a</sup> | <b>Number (%)</b> | 300 (17.2)              | 112 (30.0) | 94 (34.7) | 67 (45.0) | 52 (48.6) | 135 (58.4)  | <.0001                      |
| <b>Total</b>                  |                   | 1740                    | 373        | 271       | 149       | 107       | 231         |                             |

a. SROH was assessed by the following question. “Overall, how would you rate the health of your teeth and gums?” Potential responses ranged from “1.excellent, 2.good, 3.fair, 4.not so good or 5.poor”. In the analysis, the outcome was dichotomized:”1.excellent and 2.good, 3.fair” as “Good SROH”, and “4.not so good and 5.poor” as “Poor SROH”.

b. The chi-square test was performed to calculate the p-value.

STROBE 2007 (v4) Statement—Checklist of items that should be included in reports of *cross-sectional studies*

| Section/Topic             | Item # | Recommendation                                                                                                                                                                       | Reported on page # |
|---------------------------|--------|--------------------------------------------------------------------------------------------------------------------------------------------------------------------------------------|--------------------|
| Title and abstract        | 1      | (a) Indicate the study’s design with a commonly used term in the title or the abstract                                                                                               | #1-2               |
|                           |        | (b) Provide in the abstract an informative and balanced summary of what was done and what was found                                                                                  | #2                 |
| <b>Introduction</b>       |        |                                                                                                                                                                                      |                    |
| Background/rationale      | 2      | Explain the scientific background and rationale for the investigation being reported                                                                                                 | #4-5               |
| Objectives                | 3      | State specific objectives, including any prespecified hypotheses                                                                                                                     | #5                 |
| <b>Methods</b>            |        |                                                                                                                                                                                      |                    |
| Study design              | 4      | Present key elements of study design early in the paper                                                                                                                              | #5                 |
| Setting                   | 5      | Describe the setting, locations, and relevant dates, including periods of recruitment, exposure, follow-up, and data collection                                                      | #5-6               |
| Participants              | 6      | (a) Give the eligibility criteria, and the sources and methods of selection of participants                                                                                          | #5-6               |
| Variables                 | 7      | Clearly define all outcomes, exposures, predictors, potential confounders, and effect modifiers. Give diagnostic criteria, if applicable                                             | #6-9               |
| Data sources/ measurement | 8*     | For each variable of interest, give sources of data and details of methods of assessment (measurement). Describe comparability of assessment methods if there is more than one group | #6-9               |
| Bias                      | 9      | Describe any efforts to address potential sources of bias                                                                                                                            | #6                 |
| Study size                | 10     | Explain how the study size was arrived at                                                                                                                                            | #6                 |
| Quantitative variables    | 11     | Explain how quantitative variables were handled in the analyses. If applicable, describe which groupings were chosen and why                                                         | #6-9               |
| Statistical methods       | 12     | (a) Describe all statistical methods, including those used to control for confounding                                                                                                | #8-9               |
|                           |        | (b) Describe any methods used to examine subgroups and interactions                                                                                                                  | #9                 |
|                           |        | (c) Explain how missing data were addressed                                                                                                                                          | #9                 |
|                           |        | (d) If applicable, describe analytical methods taking account of sampling strategy                                                                                                   | not applicable     |
|                           |        | (e) Describe any sensitivity analyses                                                                                                                                                | not applicable     |
| <b>Results</b>            |        |                                                                                                                                                                                      |                    |

1  
2  
3  
4  
5  
6  
7  
8  
9  
10  
11  
12  
13  
14  
15  
16  
17  
18  
19  
20  
21  
22  
23  
24  
25  
26  
27  
28  
29  
30  
31  
32  
33  
34  
35  
36  
37  
38  
39  
40  
41  
42  
43  
44  
45  
46  
47  
48  
49

|                          |     |                                                                                                                                                                                                              |                |
|--------------------------|-----|--------------------------------------------------------------------------------------------------------------------------------------------------------------------------------------------------------------|----------------|
| Participants             | 13* | (a) Report numbers of individuals at each stage of study—eg numbers potentially eligible, examined for eligibility, confirmed eligible, included in the study, completing follow-up, and analysed            | #9             |
|                          |     | (b) Give reasons for non-participation at each stage                                                                                                                                                         | #9             |
|                          |     | (c) Consider use of a flow diagram                                                                                                                                                                           | not applicable |
| Descriptive data         | 14* | (a) Give characteristics of study participants (eg demographic, clinical, social) and information on exposures and potential confounders                                                                     | #9             |
|                          |     | (b) Indicate number of participants with missing data for each variable of interest                                                                                                                          | #9             |
| Outcome data             | 15* | Report numbers of outcome events or summary measures                                                                                                                                                         | #9             |
| Main results             | 16  | (a) Give unadjusted estimates and, if applicable, confounder-adjusted estimates and their precision (eg, 95% confidence interval). Make clear which confounders were adjusted for and why they were included | #10            |
|                          |     | (b) Report category boundaries when continuous variables were categorized                                                                                                                                    | not applicable |
|                          |     | (c) If relevant, consider translating estimates of relative risk into absolute risk for a meaningful time period                                                                                             | not applicable |
| Other analyses           | 17  | Report other analyses done—eg analyses of subgroups and interactions, and sensitivity analyses                                                                                                               | #11            |
| <b>Discussion</b>        |     |                                                                                                                                                                                                              |                |
| Key results              | 18  | Summarise key results with reference to study objectives                                                                                                                                                     | #11            |
| Limitations              | 19  | Discuss limitations of the study, taking into account sources of potential bias or imprecision. Discuss both direction and magnitude of any potential bias                                                   | #14-15         |
| Interpretation           | 20  | Give a cautious overall interpretation of results considering objectives, limitations, multiplicity of analyses, results from similar studies, and other relevant evidence                                   | #14-15         |
| Generalisability         | 21  | Discuss the generalisability (external validity) of the study results                                                                                                                                        | #14-15         |
| <b>Other information</b> |     |                                                                                                                                                                                                              |                |
| Funding                  | 22  | Give the source of funding and the role of the funders for the present study and, if applicable, for the original study on which the present article is based                                                | #16            |

\*Give information separately for cases and controls in case-control studies and, if applicable, for exposed and unexposed groups in cohort and cross-sectional studies.

**Note:** An Explanation and Elaboration article discusses each checklist item and gives methodological background and published examples of transparent reporting. The STROBE checklist is best used in conjunction with this article (freely available on the Web sites of PLoS Medicine at <http://www.plosmedicine.org/>, Annals of Internal Medicine at <http://www.annals.org/>, and Epidemiology at <http://www.epidem.com/>). Information on the STROBE Initiative is available at [www.strobe-statement.org](http://www.strobe-statement.org).
